# Supplementary material for: The Effect of Heat Sterilization on Key Filtration Performance Parameters of a Commercial Polymeric (PVDF) Hollow-Fiber Ultrafiltration Membrane
Source: MDPI journal article supplement (doi:10.3390/membranes12080725), 2022-07-22
Supplement: s1 [file s1]

## Article

# The Effect of Heat Sterilization on Key Filtration Performance Parameters of a Commercial Polymeric (PVDF) Hollow-Fiber Ultrafiltration Membrane

Alexandra Nastouli <sup>1,2</sup>, Asimina Tsirigka <sup>1</sup>, Michael Harasek <sup>2</sup>, Anastasios J. Karabelas <sup>1</sup> and Sotiris I. Patsios <sup>1,\*</sup>

<sup>1</sup> Laboratory of Natural Resources and Renewable Energies, Chemical Process & Energy Resources Institute (CPERI), Centre for Research and Technology-Hellas (CERTH), GR 57001 Thessaloniki, Greece; a.nastouli@certh.gr (A.N.); tsirigka@certh.gr (A.T.); karabaj@certh.gr (A.J.K.)

<sup>2</sup> Institute of Chemical, Environmental and Bioscience Engineering, TU Wien, AU 1040 Vienna, Austria; michael.harasek@tuwien.ac.at

\* Correspondence: patsios@certh.gr; Tel.: +30 2310498183

**Citation:** Nastouli, A.; Tsirigka, A.; Harasek, M.; Karabelas, A.J.; Patsios, S.I. The Effect of Heat Sterilization on Key Filtration Performance Parameters of a Commercial Polymeric (PVDF) Hollow-Fiber Ultrafiltration Membrane. *Membranes* **2022**, *12*, x. <https://doi.org/10.3390/xxxxx>  
Academic Editor(s): Xuezhong He

Received: 30 June 2022

Accepted: 13 July 2022

Published: date

**Publisher's Note:** MDPI stays neutral with regard to jurisdictional claims in published maps and institutional affiliations.

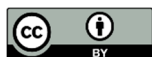

**Copyright:** © 2022 by the authors. Submitted for possible open access publication under the terms and conditions of the Creative Commons Attribution (CC BY) license (<https://creativecommons.org/licenses/by/4.0/>).

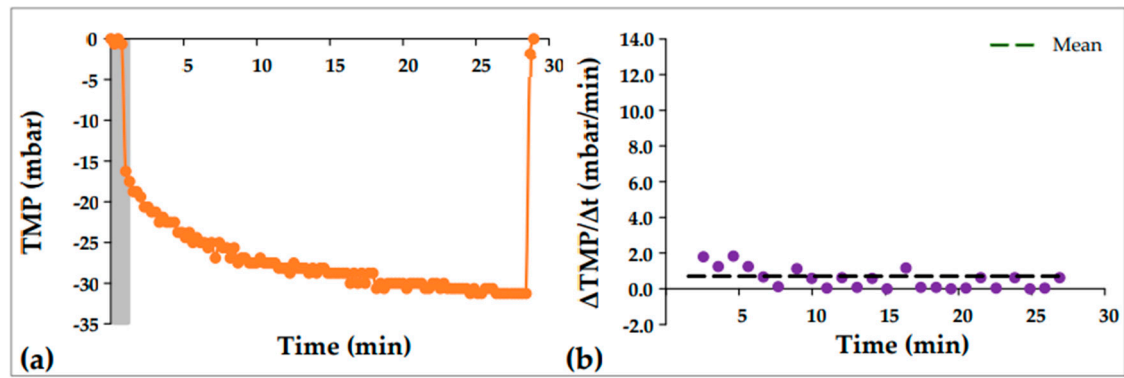

**Figure S1.** Representation of the RTMP calculation procedure: (a) Typical Trans-membrane Pressure (TMP) vs time profile (i.e. 2nd cycle of sterilization); (b) Calculated  $\Delta\text{TMP}/\Delta t$  vs time profile with the mean  $\Delta\text{TMP}/\Delta t$  value

| (a)   |            | (b)            |                                  |                                    |
|-------|------------|----------------|----------------------------------|------------------------------------|
| Time  | $\Delta P$ | Time           | $\Delta TMP/\Delta t$ (mbar/min) | $ \Delta TMP/\Delta t $ (mbar/min) |
| (min) | (mbar)     | (min)          |                                  |                                    |
| 0.00  | 0          | 1.53           | -4.012                           | 4.012                              |
| 0.25  | -1         | 2.55           | -1.798                           | 1.798                              |
| 0.50  | 0          | 3.57           | -1.251                           | 1.251                              |
| 0.77  | -1         | 4.60           | -1.837                           | 1.837                              |
| 1.02  | -16        | 5.62           | -1.251                           | 1.251                              |
| 1.28  | -18        | 6.65           | -0.664                           | 0.664                              |
| 1.53  | -19        | 7.67           | 0.117                            | -0.117                             |
| 1.78  | -19        | 8.95           | -1.133                           | 1.133                              |
| 2.03  | -19        | 9.97           | -0.586                           | 0.586                              |
| 2.30  | -21        | 11.00          | -0.039                           | 0.039                              |
| 2.55  | -21        | 12.02          | -0.625                           | 0.625                              |
| 2.80  | -21        | 13.05          | -0.078                           | 0.078                              |
| 3.07  | -21        | 14.08          | -0.586                           | 0.586                              |
| 3.32  | -23        | 15.10          | 0.000                            | 0.000                              |
| 3.57  | -22        | 16.40          | -1.172                           | 1.172                              |
| 3.83  | -23        | 17.42          | -0.078                           | 0.078                              |
| 4.08  | -23        | 18.47          | -0.074                           | 0.074                              |
| 4.35  | -23        | 19.48          | 0.000                            | 0.000                              |
| 4.60  | -24        | 20.50          | 0.039                            | -0.039                             |
| 4.87  | -24        | 21.52          | -0.625                           | 0.625                              |
| 5.12  | -24        | 22.55          | 0.039                            | -0.039                             |
| 5.37  | -24        | 23.83          | -0.625                           | 0.625                              |
| 5.62  | -25        | 24.87          | 0.000                            | 0.000                              |
| 5.88  | -24        | 25.88          | -0.039                           | 0.039                              |
| 6.13  | -25        | 26.90          | -0.625                           | 0.625                              |
| 6.40  | -25        | <b>Average</b> |                                  | 0.7                                |
| 6.65  | -26        |                |                                  |                                    |
| 6.90  | -25        |                |                                  |                                    |
| 7.17  | -27        |                |                                  |                                    |
| 7.42  | -25        |                |                                  |                                    |
| 7.67  | -26        |                |                                  |                                    |
| 7.93  | -26        |                |                                  |                                    |
| 8.18  | -27        |                |                                  |                                    |
| 8.43  | -26        |                |                                  |                                    |
| 8.70  | -28        |                |                                  |                                    |
| 8.95  | -27        |                |                                  |                                    |
| 9.20  | -27        |                |                                  |                                    |
| 9.47  | -28        |                |                                  |                                    |
| 9.72  | -28        |                |                                  |                                    |
| 9.97  | -28        |                |                                  |                                    |

|       |     |
|-------|-----|
| 10.23 | -27 |
| 10.48 | -28 |
| 10.73 | -28 |
| 11.00 | -28 |
| 11.25 | -28 |
| 11.50 | -28 |
| 11.77 | -28 |
| 12.02 | -28 |
| 12.27 | -29 |
| 12.53 | -28 |
| 12.78 | -28 |
| 13.05 | -28 |
| 13.32 | -28 |
| 13.57 | -29 |
| 13.82 | -28 |
| 14.08 | -29 |
| 14.33 | -28 |
| 14.60 | -28 |
| 14.85 | -29 |
| 15.10 | -29 |
| 15.37 | -29 |
| 15.62 | -29 |
| 15.88 | -29 |
| 16.13 | -29 |
| 16.40 | -30 |
| 16.65 | -29 |
| 16.90 | -30 |
| 17.17 | -29 |
| 17.42 | -30 |
| 17.67 | -29 |
| 17.93 | -29 |
| 18.18 | -31 |
| 18.47 | -30 |
| 18.72 | -31 |
| 18.97 | -30 |
| 19.22 | -30 |
| 19.48 | -30 |
| 19.73 | -30 |
| 19.98 | -30 |
| 20.25 | -31 |
| 20.50 | -30 |
| 20.75 | -30 |
| 21.02 | -30 |

|       |     |
|-------|-----|
| 21.27 | -30 |
| 21.52 | -31 |
| 21.78 | -31 |
| 22.03 | -30 |
| 22.28 | -30 |
| 22.55 | -31 |
| 22.80 | -30 |
| 23.05 | -31 |
| 23.32 | -31 |
| 23.57 | -31 |
| 23.83 | -31 |
| 24.08 | -31 |
| 24.33 | -31 |
| 24.60 | -31 |
| 24.87 | -31 |
| 25.12 | -31 |
| 25.37 | -31 |
| 25.63 | -31 |
| 25.88 | -31 |
| 26.13 | -31 |
| 26.38 | -31 |
| 26.65 | -31 |
| 26.90 | -31 |
| 27.15 | -31 |
| 27.42 | -31 |
| 27.67 | -31 |
| 27.92 | -31 |
| 28.17 | -31 |
| 28.43 | -31 |
| 28.70 | -2  |
| 28.95 | 0   |

**Table S2. Experimental data for Figure S1.**

| (a)        |      |                |      | (b)        |      |                |      |
|------------|------|----------------|------|------------|------|----------------|------|
| Flux (LMH) | STDV | Pressure (bar) | STDV | Flux (LMH) | STDV | Pressure (bar) | STDV |
| 49.91      | 0.07 | 0.00           | 0.14 | 49.98      | 1.23 | 0.057          | 0.04 |
| 41.04      | 0.06 | 0.02           | 0.83 | 40.00      | 0.08 | 0.046          | 0.00 |
| 31.35      | 0.05 | 0.00           | 0.03 | 30.03      | 0.03 | 0.033          | 0.00 |
| 18.86      | 0.03 | 0.00           | 0.06 | 18.72      | 0.02 | 0.021          | 0.01 |
| 10.10      | 0.02 | 0.00           | 0.03 | 10.03      | 0.14 | 0.011          | 0.08 |

  

| (c)        |      |                |      | (d)        |      |                |      |
|------------|------|----------------|------|------------|------|----------------|------|
| Flux (LMH) | STDV | Pressure (bar) | STDV | Flux (LMH) | STDV | Pressure (bar) | STDV |
| 47.34      | 0.00 | 0.048          | 0.00 | 51.61      | 0.05 | 0.052          | 0.01 |
| 39.62      | 0.00 | 0.041          | 0.00 | 40.28      | 0.04 | 0.040          | 0.00 |
| 32.40      | 0.00 | 0.034          | 0.00 | 29.72      | 0.03 | 0.029          | 0.00 |
| 19.74      | 0.00 | 0.021          | 0.00 | 18.16      | 0.02 | 0.017          | 0.01 |
| 10.35      | 0.00 | 0.012          | 0.00 | 9.78       | 0.01 | 0.009          | 0.01 |

Table S3. Experimental data for Figure 2.

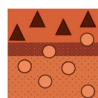

| (a)        |           |            |           | (b)   |           | (c)      |        |
|------------|-----------|------------|-----------|-------|-----------|----------|--------|
| FEED       |           | PERMEATE   |           | Time  | Rejection | MW (kDa) | t      |
| Time (min) | Intensity | Time (min) | Intensity | (min) |           |          | (min)  |
| 0.00       | 647       | 0.00       | 393       | 22.00 | 0.10      | 22.8     | 27.102 |
| 0.01       | 647       | 0.01       | 393       | 22.01 | 0.11      | 47.3     | 26.035 |
| 0.02       | 58        | 0.02       | 255       | 22.02 | 0.11      | 112      | 24.771 |
| 0.03       | -691      | 0.03       | -754      | 22.03 | 0.12      | 212      | 23.848 |
| 0.03       | -691      | 0.03       | -753      | 22.03 | 0.12      | 404      | 22.894 |
| 0.04       | -691      | 0.04       | -752      | 22.04 | 0.13      |          |        |
| 0.05       | -691      | 0.05       | -752      | 22.05 | 0.13      |          |        |
| 0.06       | -691      | 0.06       | -752      | 22.06 | 0.14      |          |        |
| 0.07       | -691      | 0.07       | -752      | 22.07 | 0.14      |          |        |
| 0.08       | -690      | 0.08       | -752      | 22.08 | 0.15      |          |        |
| 0.08       | -690      | 0.08       | -751      | 22.08 | 0.14      |          |        |
| 0.09       | -690      | 0.09       | -750      | 22.09 | 0.15      |          |        |
| 0.10       | -690      | 0.10       | -750      | 22.10 | 0.15      |          |        |
| 0.11       | -689      | 0.11       | -749      | 22.11 | 0.15      |          |        |
| 0.12       | -689      | 0.12       | -749      | 22.12 | 0.16      |          |        |
| 0.13       | -689      | 0.13       | -749      | 22.13 | 0.16      |          |        |
| 0.13       | -689      | 0.13       | -748      | 22.13 | 0.16      |          |        |
| 0.14       | -690      | 0.14       | -748      | 22.14 | 0.16      |          |        |
| 0.15       | -690      | 0.15       | -748      | 22.15 | 0.17      |          |        |
| 0.16       | -690      | 0.16       | -747      | 22.16 | 0.17      |          |        |
| 0.17       | -689      | 0.17       | -747      | 22.17 | 0.17      |          |        |
| 0.18       | -689      | 0.18       | -747      | 22.18 | 0.18      |          |        |
| 0.18       | -689      | 0.18       | -746      | 22.18 | 0.18      |          |        |
| 0.19       | -688      | 0.19       | -746      | 22.19 | 0.19      |          |        |
| 0.20       | -688      | 0.20       | -746      | 22.20 | 0.19      |          |        |
| 0.21       | -687      | 0.21       | -746      | 22.21 | 0.20      |          |        |
| 0.22       | -686      | 0.22       | -746      | 22.22 | 0.20      |          |        |
| 0.23       | -686      | 0.23       | -745      | 22.23 | 0.21      |          |        |
| 0.23       | -686      | 0.23       | -745      | 22.23 | 0.21      |          |        |
| 0.24       | -685      | 0.24       | -744      | 22.24 | 0.21      |          |        |
| 0.25       | -685      | 0.25       | -744      | 22.25 | 0.22      |          |        |
| 0.26       | -685      | 0.26       | -743      | 22.26 | 0.21      |          |        |
| 0.27       | -685      | 0.27       | -743      | 22.27 | 0.21      |          |        |
| 0.28       | -685      | 0.28       | -743      | 22.28 | 0.22      |          |        |
| 0.28       | -685      | 0.28       | -743      | 22.28 | 0.22      |          |        |
| 0.28       | -685      | 0.28       | -744      | 22.29 | 0.23      |          |        |
| 0.29       | -685      | 0.29       | -743      | 22.30 | 0.23      |          |        |

|      |      |      |      |       |      |
|------|------|------|------|-------|------|
| 0.30 | -684 | 0.30 | -742 | 22.31 | 0.24 |
| 0.31 | -683 | 0.31 | -742 | 22.32 | 0.25 |
| 0.32 | -683 | 0.32 | -741 | 22.33 | 0.25 |
| 0.33 | -682 | 0.33 | -741 | 22.33 | 0.26 |
| 0.33 | -682 | 0.33 | -741 | 22.34 | 0.26 |
| 0.34 | -682 | 0.34 | -741 | 22.35 | 0.27 |
| 0.35 | -682 | 0.35 | -740 | 22.36 | 0.27 |
| 0.36 | -682 | 0.36 | -740 | 22.37 | 0.27 |
| 0.37 | -681 | 0.37 | -740 | 22.38 | 0.27 |
| 0.38 | -680 | 0.38 | -740 | 22.38 | 0.27 |
| 0.38 | -679 | 0.38 | -739 | 22.39 | 0.28 |
| 0.39 | -679 | 0.39 | -740 | 22.40 | 0.28 |
| 0.40 | -679 | 0.40 | -739 | 22.41 | 0.29 |
| 0.41 | -678 | 0.41 | -739 | 22.42 | 0.29 |
| 0.42 | -678 | 0.42 | -738 | 22.43 | 0.29 |
| 0.43 | -677 | 0.43 | -738 | 22.43 | 0.29 |
| 0.43 | -676 | 0.43 | -738 | 22.44 | 0.30 |
| 0.44 | -676 | 0.44 | -738 | 22.45 | 0.30 |
| 0.45 | -677 | 0.45 | -738 | 22.46 | 0.31 |
| 0.46 | -677 | 0.46 | -738 | 22.47 | 0.32 |
| 0.47 | -678 | 0.47 | -738 | 22.48 | 0.32 |
| 0.48 | -678 | 0.48 | -738 | 22.48 | 0.33 |
| 0.48 | -678 | 0.48 | -738 | 22.49 | 0.32 |
| 0.49 | -677 | 0.49 | -738 | 22.50 | 0.33 |
| 0.50 | -677 | 0.50 | -737 | 22.51 | 0.33 |
| 0.51 | -676 | 0.51 | -736 | 22.52 | 0.33 |
| 0.52 | -676 | 0.52 | -735 | 22.53 | 0.33 |
| 0.53 | -676 | 0.53 | -735 | 22.53 | 0.34 |
| 0.53 | -675 | 0.53 | -735 | 22.54 | 0.34 |
| 0.54 | -675 | 0.54 | -735 | 22.55 | 0.34 |
| 0.55 | -675 | 0.55 | -735 | 22.56 | 0.34 |
| 0.56 | -675 | 0.56 | -735 | 22.57 | 0.35 |
| 0.57 | -675 | 0.57 | -734 | 22.58 | 0.35 |
| 0.58 | -674 | 0.58 | -734 | 22.58 | 0.36 |
| 0.58 | -674 | 0.58 | -733 | 22.59 | 0.36 |
| 0.59 | -674 | 0.59 | -733 | 22.60 | 0.36 |
| 0.60 | -673 | 0.60 | -732 | 22.61 | 0.37 |
| 0.61 | -673 | 0.61 | -731 | 22.62 | 0.37 |
| 0.62 | -672 | 0.62 | -731 | 22.63 | 0.37 |
| 0.63 | -672 | 0.63 | -730 | 22.63 | 0.38 |
| 0.63 | -671 | 0.63 | -730 | 22.64 | 0.38 |
| 0.64 | -671 | 0.64 | -730 | 22.65 | 0.38 |
| 0.65 | -671 | 0.65 | -729 | 22.66 | 0.39 |



|      |      |      |      |       |      |
|------|------|------|------|-------|------|
| 0.66 | -671 | 0.66 | -728 | 22.67 | 0.39 |
| 0.67 | -671 | 0.67 | -728 | 22.68 | 0.39 |
| 0.68 | -671 | 0.68 | -728 | 22.68 | 0.39 |
| 0.68 | -671 | 0.68 | -728 | 22.69 | 0.40 |
| 0.69 | -671 | 0.69 | -728 | 22.70 | 0.40 |
| 0.70 | -671 | 0.70 | -728 | 22.71 | 0.40 |
| 0.71 | -671 | 0.71 | -728 | 22.72 | 0.41 |
| 0.72 | -671 | 0.72 | -729 | 22.73 | 0.41 |
| 0.73 | -671 | 0.73 | -729 | 22.73 | 0.41 |
| 0.73 | -671 | 0.73 | -728 | 22.74 | 0.42 |
| 0.74 | -670 | 0.74 | -727 | 22.75 | 0.42 |
| 0.75 | -670 | 0.75 | -727 | 22.76 | 0.42 |
| 0.76 | -670 | 0.76 | -727 | 22.77 | 0.42 |
| 0.77 | -669 | 0.77 | -727 | 22.78 | 0.42 |
| 0.78 | -668 | 0.78 | -727 | 22.78 | 0.43 |
| 0.78 | -668 | 0.78 | -726 | 22.79 | 0.43 |
| 0.79 | -668 | 0.79 | -726 | 22.80 | 0.43 |
| 0.80 | -668 | 0.80 | -727 | 22.81 | 0.43 |
| 0.81 | -668 | 0.81 | -727 | 22.82 | 0.44 |
| 0.82 | -668 | 0.82 | -727 | 22.83 | 0.44 |
| 0.83 | -668 | 0.83 | -728 | 22.83 | 0.44 |
| 0.83 | -668 | 0.83 | -728 | 22.84 | 0.44 |
| 0.84 | -668 | 0.84 | -728 | 22.85 | 0.45 |
| 0.85 | -667 | 0.85 | -728 | 22.86 | 0.45 |
| 0.86 | -667 | 0.86 | -727 | 22.87 | 0.45 |
| 0.87 | -667 | 0.87 | -727 | 22.88 | 0.46 |
| 0.88 | -666 | 0.88 | -726 | 22.88 | 0.46 |
| 0.88 | -666 | 0.88 | -726 | 22.89 | 0.46 |
| 0.89 | -666 | 0.89 | -725 | 22.90 | 0.46 |
| 0.90 | -666 | 0.90 | -725 | 22.91 | 0.47 |
| 0.91 | -667 | 0.91 | -724 | 22.92 | 0.47 |
| 0.92 | -667 | 0.92 | -723 | 22.93 | 0.47 |
| 0.93 | -667 | 0.93 | -723 | 22.93 | 0.48 |
| 0.93 | -667 | 0.93 | -723 | 22.94 | 0.48 |
| 0.94 | -667 | 0.94 | -723 | 22.95 | 0.48 |
| 0.95 | -668 | 0.95 | -723 | 22.96 | 0.49 |
| 0.96 | -668 | 0.96 | -723 | 22.97 | 0.49 |
| 0.97 | -669 | 0.97 | -722 | 22.98 | 0.49 |
| 0.98 | -668 | 0.98 | -721 | 22.98 | 0.50 |
| 0.98 | -668 | 0.98 | -720 | 22.99 | 0.49 |
| 0.99 | -668 | 0.99 | -719 | 23.00 | 0.49 |
| 1.00 | -667 | 1.00 | -718 | 23.01 | 0.50 |
| 1.01 | -666 | 1.01 | -718 | 23.02 | 0.50 |

|      |      |      |      |       |      |
|------|------|------|------|-------|------|
| 1.02 | -665 | 1.02 | -718 | 23.03 | 0.50 |
| 1.03 | -665 | 1.03 | -718 | 23.03 | 0.50 |
| 1.03 | -664 | 1.03 | -717 | 23.04 | 0.50 |
| 1.04 | -664 | 1.04 | -716 | 23.05 | 0.51 |
| 1.05 | -664 | 1.05 | -715 | 23.06 | 0.51 |
| 1.06 | -664 | 1.06 | -715 | 23.07 | 0.52 |
| 1.07 | -663 | 1.07 | -715 | 23.08 | 0.52 |
| 1.08 | -662 | 1.08 | -715 | 23.08 | 0.52 |
| 1.08 | -661 | 1.08 | -716 | 23.09 | 0.52 |
| 1.09 | -660 | 1.09 | -716 | 23.10 | 0.53 |
| 1.10 | -660 | 1.10 | -716 | 23.11 | 0.53 |
| 1.11 | -659 | 1.11 | -715 | 23.12 | 0.53 |
| 1.12 | -659 | 1.12 | -715 | 23.13 | 0.53 |
| 1.13 | -658 | 1.13 | -715 | 23.13 | 0.53 |
| 1.13 | -658 | 1.13 | -716 | 23.14 | 0.53 |
| 1.14 | -657 | 1.14 | -716 | 23.15 | 0.54 |
| 1.15 | -657 | 1.15 | -715 | 23.16 | 0.54 |
| 1.16 | -658 | 1.16 | -715 | 23.17 | 0.54 |
| 1.17 | -658 | 1.17 | -714 | 23.18 | 0.54 |
| 1.18 | -658 | 1.18 | -714 | 23.18 | 0.55 |
| 1.18 | -657 | 1.18 | -713 | 23.19 | 0.55 |
| 1.19 | -656 | 1.19 | -713 | 23.20 | 0.55 |
| 1.20 | -656 | 1.20 | -712 | 23.21 | 0.55 |
| 1.21 | -656 | 1.21 | -711 | 23.22 | 0.56 |
| 1.22 | -656 | 1.22 | -711 | 23.23 | 0.56 |
| 1.23 | -656 | 1.23 | -710 | 23.23 | 0.56 |
| 1.23 | -655 | 1.23 | -711 | 23.24 | 0.56 |
| 1.24 | -655 | 1.24 | -711 | 23.25 | 0.56 |
| 1.25 | -655 | 1.25 | -711 | 23.26 | 0.56 |
| 1.26 | -654 | 1.26 | -711 | 23.27 | 0.57 |
| 1.27 | -654 | 1.27 | -710 | 23.28 | 0.57 |
| 1.28 | -654 | 1.28 | -710 | 23.28 | 0.57 |
| 1.28 | -653 | 1.28 | -709 | 23.29 | 0.57 |
| 1.29 | -653 | 1.29 | -709 | 23.30 | 0.57 |
| 1.30 | -653 | 1.30 | -709 | 23.31 | 0.58 |
| 1.31 | -653 | 1.31 | -709 | 23.32 | 0.58 |
| 1.32 | -653 | 1.32 | -709 | 23.33 | 0.58 |
| 1.33 | -654 | 1.33 | -709 | 23.33 | 0.58 |
| 1.33 | -654 | 1.33 | -710 | 23.34 | 0.58 |
| 1.34 | -654 | 1.34 | -711 | 23.35 | 0.58 |
| 1.35 | -653 | 1.35 | -712 | 23.36 | 0.58 |
| 1.36 | -653 | 1.36 | -713 | 23.37 | 0.58 |
| 1.37 | -653 | 1.37 | -713 | 23.38 | 0.58 |

|      |      |      |      |       |      |
|------|------|------|------|-------|------|
| 1.38 | -652 | 1.38 | -713 | 23.38 | 0.58 |
| 1.38 | -652 | 1.38 | -713 | 23.39 | 0.59 |
| 1.39 | -652 | 1.39 | -713 | 23.40 | 0.59 |
| 1.40 | -652 | 1.40 | -713 | 23.41 | 0.59 |
| 1.41 | -652 | 1.41 | -712 | 23.42 | 0.59 |
| 1.42 | -652 | 1.42 | -712 | 23.43 | 0.59 |
| 1.43 | -651 | 1.43 | -710 | 23.43 | 0.59 |
| 1.43 | -651 | 1.43 | -709 | 23.44 | 0.59 |
| 1.44 | -650 | 1.44 | -709 | 23.45 | 0.59 |
| 1.45 | -650 | 1.45 | -708 | 23.46 | 0.60 |
| 1.46 | -650 | 1.46 | -707 | 23.47 | 0.60 |
| 1.47 | -649 | 1.47 | -707 | 23.48 | 0.60 |
| 1.48 | -648 | 1.48 | -707 | 23.48 | 0.60 |
| 1.48 | -648 | 1.48 | -708 | 23.49 | 0.60 |
| 1.49 | -647 | 1.49 | -708 | 23.50 | 0.61 |
| 1.50 | -646 | 1.50 | -709 | 23.51 | 0.61 |
| 1.51 | -646 | 1.51 | -709 | 23.52 | 0.61 |
| 1.52 | -645 | 1.52 | -708 | 23.53 | 0.61 |
| 1.53 | -645 | 1.53 | -708 | 23.53 | 0.61 |
| 1.53 | -644 | 1.53 | -708 | 23.54 | 0.61 |
| 1.54 | -644 | 1.54 | -708 | 23.55 | 0.62 |
| 1.55 | -644 | 1.55 | -707 | 23.56 | 0.62 |
| 1.56 | -644 | 1.56 | -707 | 23.57 | 0.62 |
| 1.57 | -644 | 1.57 | -707 | 23.58 | 0.62 |
| 1.58 | -644 | 1.58 | -706 | 23.58 | 0.62 |
| 1.58 | -644 | 1.58 | -706 | 23.59 | 0.62 |
| 1.59 | -644 | 1.59 | -706 | 23.60 | 0.61 |
| 1.60 | -644 | 1.60 | -706 | 23.61 | 0.62 |
| 1.61 | -644 | 1.61 | -706 | 23.62 | 0.62 |
| 1.62 | -644 | 1.62 | -705 | 23.63 | 0.62 |
| 1.63 | -644 | 1.63 | -705 | 23.63 | 0.62 |
| 1.63 | -644 | 1.63 | -705 | 23.64 | 0.62 |
| 1.64 | -643 | 1.64 | -704 | 23.65 | 0.62 |
| 1.65 | -643 | 1.65 | -703 | 23.66 | 0.62 |
| 1.66 | -642 | 1.66 | -703 | 23.67 | 0.62 |
| 1.67 | -642 | 1.67 | -703 | 23.68 | 0.62 |
| 1.68 | -642 | 1.68 | -703 | 23.68 | 0.63 |
| 1.68 | -641 | 1.68 | -702 | 23.69 | 0.63 |
| 1.69 | -641 | 1.69 | -702 | 23.70 | 0.63 |
| 1.70 | -640 | 1.70 | -701 | 23.71 | 0.63 |
| 1.71 | -640 | 1.71 | -700 | 23.72 | 0.63 |
| 1.72 | -640 | 1.72 | -700 | 23.73 | 0.63 |
| 1.73 | -641 | 1.73 | -699 | 23.73 | 0.64 |

|      |      |      |      |       |      |
|------|------|------|------|-------|------|
| 1.73 | -641 | 1.73 | -698 | 23.74 | 0.64 |
| 1.74 | -641 | 1.74 | -698 | 23.75 | 0.64 |
| 1.75 | -641 | 1.75 | -697 | 23.76 | 0.64 |
| 1.76 | -641 | 1.76 | -697 | 23.77 | 0.64 |
| 1.77 | -640 | 1.77 | -697 | 23.78 | 0.64 |
| 1.78 | -640 | 1.78 | -697 | 23.78 | 0.64 |
| 1.78 | -641 | 1.78 | -698 | 23.79 | 0.65 |
| 1.79 | -640 | 1.79 | -698 | 23.80 | 0.65 |
| 1.80 | -639 | 1.80 | -697 | 23.81 | 0.65 |
| 1.81 | -638 | 1.81 | -697 | 23.82 | 0.65 |
| 1.82 | -638 | 1.82 | -698 | 23.83 | 0.65 |
| 1.83 | -637 | 1.83 | -698 | 23.83 | 0.65 |
| 1.83 | -637 | 1.83 | -698 | 23.84 | 0.66 |
| 1.84 | -637 | 1.84 | -697 | 23.85 | 0.66 |
| 1.85 | -637 | 1.85 | -697 | 23.86 | 0.66 |
| 1.86 | -636 | 1.86 | -697 | 23.87 | 0.66 |
| 1.87 | -636 | 1.87 | -697 | 23.88 | 0.66 |
| 1.88 | -636 | 1.88 | -697 | 23.88 | 0.66 |
| 1.88 | -635 | 1.88 | -696 | 23.89 | 0.66 |
| 1.89 | -635 | 1.89 | -696 | 23.90 | 0.67 |
| 1.90 | -635 | 1.90 | -695 | 23.91 | 0.67 |
| 1.91 | -635 | 1.91 | -694 | 23.92 | 0.67 |
| 1.92 | -634 | 1.92 | -694 | 23.93 | 0.67 |
| 1.93 | -633 | 1.93 | -693 | 23.93 | 0.67 |
| 1.93 | -633 | 1.93 | -693 | 23.94 | 0.67 |
| 1.94 | -632 | 1.94 | -692 | 23.95 | 0.68 |
| 1.95 | -631 | 1.95 | -692 | 23.96 | 0.68 |
| 1.96 | -631 | 1.96 | -691 | 23.97 | 0.68 |
| 1.97 | -630 | 1.97 | -691 | 23.98 | 0.68 |
| 1.98 | -630 | 1.98 | -692 | 23.98 | 0.68 |
| 1.98 | -630 | 1.98 | -692 | 23.99 | 0.68 |
| 1.99 | -630 | 1.99 | -692 | 24.00 | 0.68 |
| 2.00 | -630 | 2.00 | -692 | 24.01 | 0.68 |
| 2.01 | -629 | 2.01 | -692 | 24.02 | 0.69 |
| 2.02 | -629 | 2.02 | -691 | 24.03 | 0.69 |
| 2.03 | -629 | 2.03 | -691 | 24.03 | 0.69 |
| 2.03 | -629 | 2.03 | -690 | 24.04 | 0.69 |
| 2.04 | -629 | 2.04 | -690 | 24.05 | 0.69 |
| 2.05 | -629 | 2.05 | -690 | 24.06 | 0.69 |
| 2.06 | -629 | 2.06 | -691 | 24.07 | 0.69 |
| 2.07 | -629 | 2.07 | -691 | 24.08 | 0.69 |
| 2.08 | -629 | 2.08 | -691 | 24.08 | 0.70 |
| 2.08 | -629 | 2.08 | -691 | 24.09 | 0.70 |

|      |      |      |      |       |      |
|------|------|------|------|-------|------|
| 2.09 | -629 | 2.09 | -691 | 24.10 | 0.70 |
| 2.10 | -628 | 2.10 | -691 | 24.11 | 0.70 |
| 2.11 | -628 | 2.11 | -690 | 24.12 | 0.70 |
| 2.12 | -628 | 2.12 | -689 | 24.13 | 0.70 |
| 2.13 | -628 | 2.13 | -689 | 24.13 | 0.70 |
| 2.13 | -628 | 2.13 | -690 | 24.14 | 0.70 |
| 2.14 | -627 | 2.14 | -690 | 24.15 | 0.71 |
| 2.15 | -626 | 2.15 | -689 | 24.16 | 0.71 |
| 2.16 | -626 | 2.16 | -689 | 24.17 | 0.71 |
| 2.17 | -625 | 2.17 | -688 | 24.18 | 0.71 |
| 2.18 | -625 | 2.18 | -687 | 24.18 | 0.71 |
| 2.18 | -624 | 2.18 | -687 | 24.19 | 0.71 |
| 2.19 | -624 | 2.19 | -687 | 24.20 | 0.71 |
| 2.20 | -624 | 2.20 | -687 | 24.21 | 0.71 |
| 2.21 | -624 | 2.21 | -687 | 24.22 | 0.71 |
| 2.22 | -623 | 2.22 | -687 | 24.23 | 0.71 |
| 2.23 | -624 | 2.23 | -688 | 24.23 | 0.71 |
| 2.23 | -624 | 2.23 | -688 | 24.24 | 0.71 |
| 2.24 | -624 | 2.24 | -688 | 24.25 | 0.71 |
| 2.25 | -624 | 2.25 | -687 | 24.26 | 0.72 |
| 2.26 | -624 | 2.26 | -687 | 24.27 | 0.72 |
| 2.27 | -624 | 2.27 | -686 | 24.28 | 0.72 |
| 2.28 | -623 | 2.28 | -686 | 24.28 | 0.72 |
| 2.28 | -623 | 2.28 | -685 | 24.29 | 0.72 |
| 2.29 | -623 | 2.29 | -685 | 24.30 | 0.72 |
| 2.30 | -623 | 2.30 | -685 | 24.31 | 0.72 |
| 2.31 | -622 | 2.31 | -684 | 24.32 | 0.72 |
| 2.32 | -623 | 2.32 | -684 | 24.33 | 0.72 |
| 2.33 | -623 | 2.33 | -683 | 24.33 | 0.72 |
| 2.33 | -622 | 2.33 | -683 | 24.34 | 0.72 |
| 2.34 | -621 | 2.34 | -683 | 24.35 | 0.72 |
| 2.35 | -620 | 2.35 | -683 | 24.36 | 0.73 |
| 2.36 | -620 | 2.36 | -683 | 24.37 | 0.73 |
| 2.37 | -619 | 2.37 | -681 | 24.38 | 0.73 |
| 2.38 | -618 | 2.38 | -681 | 24.38 | 0.73 |
| 2.38 | -618 | 2.38 | -680 | 24.39 | 0.73 |
| 2.39 | -619 | 2.39 | -680 | 24.40 | 0.73 |
| 2.40 | -619 | 2.40 | -679 | 24.41 | 0.73 |
| 2.41 | -619 | 2.41 | -678 | 24.42 | 0.73 |
| 2.42 | -619 | 2.42 | -678 | 24.43 | 0.73 |
| 2.43 | -618 | 2.43 | -677 | 24.43 | 0.73 |
| 2.43 | -618 | 2.43 | -677 | 24.44 | 0.73 |
| 2.44 | -618 | 2.44 | -677 | 24.45 | 0.74 |

|      |      |      |      |       |      |
|------|------|------|------|-------|------|
| 2.45 | -618 | 2.45 | -677 | 24.46 | 0.73 |
| 2.46 | -617 | 2.46 | -677 | 24.47 | 0.74 |
| 2.47 | -617 | 2.47 | -677 | 24.48 | 0.74 |
| 2.48 | -616 | 2.48 | -677 | 24.48 | 0.74 |
| 2.48 | -615 | 2.48 | -676 | 24.49 | 0.74 |
| 2.49 | -615 | 2.49 | -677 | 24.50 | 0.74 |
| 2.50 | -614 | 2.50 | -677 | 24.51 | 0.74 |
| 2.51 | -614 | 2.51 | -676 | 24.52 | 0.74 |
| 2.52 | -614 | 2.52 | -676 | 24.53 | 0.74 |
| 2.53 | -613 | 2.53 | -675 | 24.53 | 0.74 |
| 2.53 | -612 | 2.53 | -675 | 24.54 | 0.75 |
| 2.54 | -612 | 2.54 | -674 | 24.55 | 0.75 |
| 2.55 | -612 | 2.55 | -674 | 24.56 | 0.75 |
| 2.56 | -612 | 2.56 | -673 | 24.57 | 0.75 |
| 2.57 | -612 | 2.57 | -673 | 24.58 | 0.75 |
| 2.58 | -612 | 2.58 | -673 | 24.58 | 0.76 |
| 2.58 | -612 | 2.58 | -672 | 24.59 | 0.75 |
| 2.59 | -612 | 2.59 | -672 | 24.60 | 0.76 |
| 2.60 | -612 | 2.60 | -672 | 24.61 | 0.76 |
| 2.61 | -612 | 2.61 | -671 | 24.62 | 0.76 |
| 2.62 | -612 | 2.62 | -671 | 24.63 | 0.76 |
| 2.63 | -611 | 2.63 | -671 | 24.63 | 0.76 |
| 2.63 | -611 | 2.63 | -671 | 24.64 | 0.76 |
| 2.64 | -610 | 2.64 | -672 | 24.65 | 0.76 |
| 2.65 | -610 | 2.65 | -672 | 24.66 | 0.76 |
| 2.66 | -610 | 2.66 | -672 | 24.67 | 0.76 |
| 2.67 | -610 | 2.67 | -672 | 24.68 | 0.76 |
| 2.68 | -609 | 2.68 | -672 | 24.68 | 0.76 |
| 2.68 | -609 | 2.68 | -671 | 24.69 | 0.76 |
| 2.69 | -608 | 2.69 | -670 | 24.70 | 0.76 |
| 2.70 | -608 | 2.70 | -670 | 24.71 | 0.76 |
| 2.71 | -607 | 2.71 | -669 | 24.72 | 0.76 |
| 2.72 | -607 | 2.72 | -669 | 24.73 | 0.77 |
| 2.73 | -607 | 2.73 | -669 | 24.73 | 0.77 |
| 2.73 | -607 | 2.73 | -668 | 24.74 | 0.77 |
| 2.74 | -607 | 2.74 | -668 | 24.75 | 0.77 |
| 2.75 | -607 | 2.75 | -668 | 24.76 | 0.77 |
| 2.76 | -606 | 2.76 | -669 | 24.77 | 0.77 |
| 2.77 | -606 | 2.77 | -668 | 24.78 | 0.77 |
| 2.78 | -606 | 2.78 | -668 | 24.78 | 0.77 |
| 2.78 | -605 | 2.78 | -668 | 24.79 | 0.77 |
| 2.79 | -605 | 2.79 | -668 | 24.80 | 0.77 |
| 2.80 | -604 | 2.80 | -668 | 24.81 | 0.77 |

|      |      |      |      |       |      |
|------|------|------|------|-------|------|
| 2.81 | -604 | 2.81 | -667 | 24.82 | 0.77 |
| 2.82 | -604 | 2.82 | -668 | 24.83 | 0.77 |
| 2.83 | -604 | 2.83 | -667 | 24.83 | 0.78 |
| 2.83 | -604 | 2.83 | -667 | 24.84 | 0.78 |
| 2.84 | -604 | 2.84 | -667 | 24.85 | 0.78 |
| 2.85 | -604 | 2.85 | -666 | 24.86 | 0.78 |
| 2.86 | -604 | 2.86 | -666 | 24.87 | 0.78 |
| 2.87 | -604 | 2.87 | -665 | 24.88 | 0.78 |
| 2.88 | -604 | 2.88 | -665 | 24.88 | 0.78 |
| 2.88 | -604 | 2.88 | -664 | 24.89 | 0.78 |
| 2.89 | -603 | 2.89 | -664 | 24.90 | 0.78 |
| 2.90 | -602 | 2.90 | -664 | 24.91 | 0.79 |
| 2.91 | -601 | 2.91 | -664 | 24.92 | 0.79 |
| 2.92 | -601 | 2.92 | -664 | 24.93 | 0.79 |
| 2.93 | -600 | 2.93 | -664 | 24.93 | 0.79 |
| 2.93 | -600 | 2.93 | -664 | 24.94 | 0.79 |
| 2.94 | -600 | 2.94 | -664 | 24.95 | 0.79 |
| 2.95 | -599 | 2.95 | -663 | 24.96 | 0.79 |
| 2.96 | -599 | 2.96 | -663 | 24.97 | 0.79 |
| 2.97 | -599 | 2.97 | -662 | 24.98 | 0.79 |
| 2.98 | -598 | 2.98 | -662 | 24.98 | 0.79 |
| 2.98 | -598 | 2.98 | -662 | 24.99 | 0.79 |
| 2.99 | -597 | 2.99 | -661 | 25.00 | 0.80 |
| 3.00 | -597 | 3.00 | -661 | 25.01 | 0.80 |
| 3.01 | -597 | 3.01 | -660 | 25.02 | 0.80 |
| 3.02 | -598 | 3.02 | -659 | 25.03 | 0.80 |
| 3.03 | -598 | 3.03 | -659 | 25.03 | 0.80 |
| 3.03 | -598 | 3.03 | -659 | 25.04 | 0.80 |
| 3.04 | -598 | 3.04 | -659 | 25.05 | 0.80 |
| 3.05 | -598 | 3.05 | -659 | 25.06 | 0.80 |
| 3.06 | -598 | 3.06 | -659 | 25.07 | 0.80 |
| 3.07 | -598 | 3.07 | -660 | 25.08 | 0.80 |
| 3.08 | -597 | 3.08 | -660 | 25.08 | 0.80 |
| 3.08 | -597 | 3.08 | -661 | 25.09 | 0.80 |
| 3.09 | -597 | 3.09 | -660 | 25.10 | 0.81 |
| 3.10 | -597 | 3.10 | -659 | 25.11 | 0.81 |
| 3.11 | -596 | 3.11 | -659 | 25.12 | 0.81 |
| 3.12 | -595 | 3.12 | -659 | 25.13 | 0.81 |
| 3.13 | -595 | 3.13 | -659 | 25.13 | 0.81 |
| 3.13 | -595 | 3.13 | -659 | 25.14 | 0.81 |
| 3.14 | -595 | 3.14 | -659 | 25.15 | 0.81 |
| 3.15 | -595 | 3.15 | -658 | 25.16 | 0.81 |
| 3.16 | -594 | 3.16 | -658 | 25.17 | 0.81 |

|      |      |      |      |       |      |
|------|------|------|------|-------|------|
| 3.17 | -594 | 3.17 | -658 | 25.18 | 0.81 |
| 3.18 | -593 | 3.18 | -657 | 25.18 | 0.82 |
| 3.18 | -592 | 3.18 | -657 | 25.19 | 0.82 |
| 3.19 | -592 | 3.19 | -657 | 25.20 | 0.82 |
| 3.20 | -591 | 3.20 | -657 | 25.21 | 0.82 |
| 3.21 | -591 | 3.21 | -656 | 25.22 | 0.82 |
| 3.22 | -591 | 3.22 | -656 | 25.23 | 0.82 |
| 3.23 | -591 | 3.23 | -655 | 25.23 | 0.82 |
| 3.23 | -591 | 3.23 | -655 | 25.24 | 0.82 |
| 3.24 | -592 | 3.24 | -655 | 25.25 | 0.82 |
| 3.25 | -592 | 3.25 | -655 | 25.26 | 0.82 |
| 3.26 | -592 | 3.26 | -655 | 25.27 | 0.82 |
| 3.27 | -592 | 3.27 | -654 | 25.28 | 0.82 |
| 3.28 | -592 | 3.28 | -654 | 25.28 | 0.82 |
| 3.28 | -592 | 3.28 | -653 | 25.29 | 0.83 |
| 3.29 | -592 | 3.29 | -653 | 25.30 | 0.83 |
| 3.30 | -591 | 3.30 | -652 | 25.31 | 0.83 |
| 3.31 | -591 | 3.31 | -652 | 25.32 | 0.83 |
| 3.32 | -591 | 3.32 | -652 | 25.33 | 0.83 |
| 3.33 | -590 | 3.33 | -652 | 25.33 | 0.83 |
| 3.33 | -591 | 3.33 | -652 | 25.34 | 0.83 |
| 3.34 | -590 | 3.34 | -651 | 25.35 | 0.83 |
| 3.35 | -589 | 3.35 | -650 | 25.36 | 0.83 |
| 3.36 | -588 | 3.36 | -650 | 25.37 | 0.84 |
| 3.37 | -588 | 3.37 | -650 | 25.38 | 0.84 |
| 3.38 | -588 | 3.38 | -649 | 25.38 | 0.84 |
| 3.38 | -588 | 3.38 | -648 | 25.39 | 0.84 |
| 3.39 | -588 | 3.39 | -648 | 25.40 | 0.84 |
| 3.40 | -588 | 3.40 | -647 | 25.41 | 0.84 |
| 3.41 | -588 | 3.41 | -647 | 25.42 | 0.84 |
| 3.42 | -588 | 3.42 | -647 | 25.43 | 0.84 |
| 3.43 | -588 | 3.43 | -647 | 25.43 | 0.84 |
| 3.43 | -588 | 3.43 | -648 | 25.44 | 0.84 |
| 3.44 | -588 | 3.44 | -648 | 25.45 | 0.84 |
| 3.45 | -588 | 3.45 | -648 | 25.46 | 0.84 |
| 3.46 | -587 | 3.46 | -648 | 25.47 | 0.84 |
| 3.47 | -587 | 3.47 | -648 | 25.48 | 0.84 |
| 3.48 | -587 | 3.48 | -648 | 25.48 | 0.84 |
| 3.48 | -586 | 3.48 | -648 | 25.49 | 0.84 |
| 3.49 | -586 | 3.49 | -648 | 25.50 | 0.84 |
| 3.50 | -585 | 3.50 | -647 | 25.51 | 0.84 |
| 3.51 | -584 | 3.51 | -646 | 25.52 | 0.84 |
| 3.52 | -584 | 3.52 | -645 | 25.53 | 0.84 |



|      |      |      |      |       |      |
|------|------|------|------|-------|------|
| 3.53 | -584 | 3.53 | -645 | 25.53 | 0.84 |
| 3.53 | -584 | 3.53 | -645 | 25.54 | 0.84 |
| 3.54 | -583 | 3.54 | -645 | 25.55 | 0.84 |
| 3.55 | -583 | 3.55 | -646 | 25.56 | 0.84 |
| 3.56 | -582 | 3.56 | -646 | 25.57 | 0.84 |
| 3.57 | -581 | 3.57 | -646 | 25.58 | 0.84 |
| 3.58 | -581 | 3.58 | -646 | 25.58 | 0.84 |
| 3.58 | -581 | 3.58 | -645 | 25.59 | 0.84 |
| 3.59 | -580 | 3.59 | -645 | 25.60 | 0.84 |
| 3.60 | -580 | 3.60 | -645 | 25.61 | 0.84 |
| 3.61 | -580 | 3.61 | -646 | 25.62 | 0.85 |
| 3.62 | -579 | 3.62 | -646 | 25.63 | 0.85 |
| 3.63 | -579 | 3.63 | -645 | 25.63 | 0.85 |
| 3.63 | -579 | 3.63 | -645 | 25.64 | 0.85 |
| 3.64 | -579 | 3.64 | -645 | 25.65 | 0.85 |
| 3.65 | -578 | 3.65 | -644 | 25.66 | 0.85 |
| 3.66 | -579 | 3.66 | -644 | 25.67 | 0.85 |
| 3.67 | -579 | 3.67 | -644 | 25.68 | 0.85 |
| 3.68 | -580 | 3.68 | -644 | 25.68 | 0.85 |
| 3.68 | -580 | 3.68 | -643 | 25.69 | 0.85 |
| 3.69 | -580 | 3.69 | -643 | 25.70 | 0.85 |
| 3.70 | -579 | 3.70 | -644 | 25.71 | 0.85 |
| 3.71 | -579 | 3.71 | -644 | 25.72 | 0.85 |
| 3.72 | -578 | 3.72 | -644 | 25.73 | 0.85 |
| 3.73 | -577 | 3.73 | -644 | 25.73 | 0.85 |
| 3.73 | -577 | 3.73 | -645 | 25.74 | 0.85 |
| 3.74 | -577 | 3.74 | -646 | 25.75 | 0.85 |
| 3.75 | -577 | 3.75 | -646 | 25.76 | 0.86 |
| 3.76 | -576 | 3.76 | -646 | 25.77 | 0.85 |
| 3.77 | -576 | 3.77 | -646 | 25.78 | 0.85 |
| 3.78 | -575 | 3.78 | -646 | 25.78 | 0.85 |
| 3.78 | -575 | 3.78 | -645 | 25.79 | 0.86 |
| 3.79 | -574 | 3.79 | -644 | 25.80 | 0.86 |
| 3.80 | -574 | 3.80 | -644 | 25.81 | 0.86 |
| 3.81 | -575 | 3.81 | -643 | 25.82 | 0.86 |
| 3.82 | -574 | 3.82 | -643 | 25.83 | 0.86 |
| 3.83 | -574 | 3.83 | -644 | 25.83 | 0.86 |
| 3.83 | -573 | 3.83 | -644 | 25.84 | 0.86 |
| 3.84 | -572 | 3.84 | -644 | 25.85 | 0.86 |
| 3.85 | -573 | 3.85 | -644 | 25.86 | 0.87 |
| 3.86 | -573 | 3.86 | -644 | 25.87 | 0.87 |
| 3.87 | -573 | 3.87 | -643 | 25.88 | 0.87 |
| 3.88 | -573 | 3.88 | -644 | 25.88 | 0.87 |

|      |      |      |      |       |      |
|------|------|------|------|-------|------|
| 3.88 | -572 | 3.88 | -644 | 25.89 | 0.87 |
| 3.89 | -572 | 3.89 | -643 | 25.90 | 0.87 |
| 3.90 | -572 | 3.90 | -643 | 25.91 | 0.87 |
| 3.91 | -572 | 3.91 | -643 | 25.92 | 0.87 |
| 3.92 | -571 | 3.92 | -642 | 25.93 | 0.87 |
| 3.93 | -571 | 3.93 | -642 | 25.93 | 0.87 |
| 3.93 | -571 | 3.93 | -641 | 25.94 | 0.87 |
| 3.94 | -570 | 3.94 | -641 | 25.95 | 0.87 |
| 3.95 | -570 | 3.95 | -640 | 25.96 | 0.87 |
| 3.96 | -570 | 3.96 | -640 | 25.97 | 0.87 |
| 3.97 | -569 | 3.97 | -639 | 25.98 | 0.87 |
| 3.98 | -569 | 3.98 | -639 | 25.98 | 0.87 |
| 3.98 | -569 | 3.98 | -638 | 25.99 | 0.87 |
| 3.99 | -569 | 3.99 | -639 | 26.00 | 0.88 |
| 4.00 | -569 | 4.00 | -639 | 26.01 | 0.88 |
| 4.01 | -568 | 4.01 | -639 | 26.02 | 0.88 |
| 4.02 | -568 | 4.02 | -639 | 26.03 | 0.88 |
| 4.03 | -568 | 4.03 | -640 | 26.03 | 0.88 |
| 4.03 | -567 | 4.03 | -639 | 26.04 | 0.88 |
| 4.04 | -567 | 4.04 | -640 | 26.05 | 0.88 |
| 4.05 | -568 | 4.05 | -640 | 26.06 | 0.88 |
| 4.06 | -568 | 4.06 | -639 | 26.07 | 0.88 |
| 4.07 | -568 | 4.07 | -639 | 26.08 | 0.88 |
| 4.08 | -567 | 4.08 | -639 | 26.08 | 0.89 |
| 4.08 | -567 | 4.08 | -639 | 26.09 | 0.89 |
| 4.09 | -567 | 4.09 | -639 | 26.10 | 0.89 |
| 4.10 | -567 | 4.10 | -639 | 26.11 | 0.89 |
| 4.11 | -567 | 4.11 | -638 | 26.12 | 0.89 |
| 4.12 | -567 | 4.12 | -638 | 26.13 | 0.89 |
| 4.13 | -566 | 4.13 | -637 | 26.13 | 0.89 |
| 4.13 | -566 | 4.13 | -636 | 26.14 | 0.89 |
| 4.14 | -565 | 4.14 | -635 | 26.15 | 0.90 |
| 4.15 | -565 | 4.15 | -635 | 26.16 | 0.90 |
| 4.16 | -565 | 4.16 | -634 | 26.17 | 0.90 |
| 4.17 | -564 | 4.17 | -633 | 26.18 | 0.90 |
| 4.18 | -564 | 4.18 | -632 | 26.18 | 0.90 |
| 4.18 | -564 | 4.18 | -632 | 26.19 | 0.90 |
| 4.19 | -564 | 4.19 | -632 | 26.20 | 0.90 |
| 4.20 | -563 | 4.20 | -632 | 26.21 | 0.90 |
| 4.21 | -563 | 4.21 | -632 | 26.22 | 0.90 |
| 4.22 | -563 | 4.22 | -632 | 26.23 | 0.90 |
| 4.23 | -563 | 4.23 | -632 | 26.23 | 0.90 |
| 4.23 | -563 | 4.23 | -631 | 26.24 | 0.90 |

|      |      |      |      |       |      |
|------|------|------|------|-------|------|
| 4.24 | -563 | 4.24 | -631 | 26.25 | 0.90 |
| 4.25 | -563 | 4.25 | -631 | 26.26 | 0.90 |
| 4.26 | -563 | 4.26 | -632 | 26.27 | 0.90 |
| 4.27 | -562 | 4.27 | -632 | 26.28 | 0.90 |
| 4.28 | -561 | 4.28 | -632 | 26.28 | 0.90 |
| 4.28 | -561 | 4.28 | -632 | 26.29 | 0.91 |
| 4.29 | -561 | 4.29 | -633 | 26.30 | 0.91 |
| 4.30 | -561 | 4.30 | -632 | 26.31 | 0.91 |
| 4.31 | -562 | 4.31 | -632 | 26.32 | 0.91 |
| 4.32 | -561 | 4.32 | -632 | 26.33 | 0.91 |
| 4.33 | -561 | 4.33 | -631 | 26.33 | 0.91 |
| 4.33 | -560 | 4.33 | -631 | 26.34 | 0.91 |
| 4.34 | -560 | 4.34 | -630 | 26.35 | 0.91 |
| 4.35 | -560 | 4.35 | -629 | 26.36 | 0.91 |
| 4.36 | -559 | 4.36 | -629 | 26.37 | 0.91 |
| 4.37 | -559 | 4.37 | -629 | 26.38 | 0.92 |
| 4.38 | -558 | 4.38 | -628 | 26.38 | 0.92 |
| 4.38 | -558 | 4.38 | -628 | 26.39 | 0.92 |
| 4.39 | -558 | 4.39 | -628 | 26.40 | 0.92 |
| 4.40 | -558 | 4.40 | -628 | 26.41 | 0.92 |
| 4.41 | -557 | 4.41 | -628 | 26.42 | 0.92 |
| 4.42 | -557 | 4.42 | -627 | 26.43 | 0.92 |
| 4.43 | -557 | 4.43 | -626 | 26.43 | 0.92 |
| 4.43 | -558 | 4.43 | -626 | 26.44 | 0.92 |
| 4.44 | -558 | 4.44 | -626 | 26.45 | 0.92 |
| 4.45 | -558 | 4.45 | -626 | 26.46 | 0.92 |
| 4.46 | -557 | 4.46 | -626 | 26.47 | 0.92 |
| 4.47 | -557 | 4.47 | -626 | 26.48 | 0.92 |
| 4.48 | -557 | 4.48 | -625 | 26.48 | 0.93 |
| 4.48 | -557 | 4.48 | -624 | 26.49 | 0.93 |
| 4.49 | -557 | 4.49 | -623 | 26.50 | 0.93 |
| 4.50 | -557 | 4.50 | -622 | 26.51 | 0.93 |
| 4.51 | -557 | 4.51 | -623 | 26.52 | 0.93 |
| 4.52 | -556 | 4.52 | -623 | 26.53 | 0.93 |
| 4.53 | -557 | 4.53 | -623 | 26.53 | 0.93 |
| 4.53 | -556 | 4.53 | -623 | 26.54 | 0.93 |
| 4.54 | -556 | 4.54 | -623 | 26.55 | 0.93 |
| 4.55 | -556 | 4.55 | -623 | 26.56 | 0.93 |
| 4.56 | -556 | 4.56 | -623 | 26.57 | 0.93 |
| 4.57 | -556 | 4.57 | -623 | 26.58 | 0.93 |
| 4.58 | -556 | 4.58 | -622 | 26.58 | 0.93 |
| 4.58 | -555 | 4.58 | -621 | 26.59 | 0.93 |
| 4.59 | -555 | 4.59 | -621 | 26.60 | 0.93 |

|      |      |      |      |       |      |
|------|------|------|------|-------|------|
| 4.60 | -555 | 4.60 | -620 | 26.61 | 0.93 |
| 4.61 | -555 | 4.61 | -620 | 26.62 | 0.93 |
| 4.62 | -553 | 4.62 | -619 | 26.63 | 0.93 |
| 4.63 | -552 | 4.63 | -617 | 26.63 | 0.93 |
| 4.63 | -551 | 4.63 | -616 | 26.64 | 0.93 |
| 4.64 | -550 | 4.64 | -616 | 26.65 | 0.93 |
| 4.65 | -549 | 4.65 | -616 | 26.66 | 0.93 |
| 4.66 | -549 | 4.66 | -616 | 26.67 | 0.93 |
| 4.67 | -548 | 4.67 | -616 | 26.68 | 0.93 |
| 4.68 | -548 | 4.68 | -617 | 26.68 | 0.93 |
| 4.68 | -548 | 4.68 | -617 | 26.69 | 0.94 |
| 4.69 | -548 | 4.69 | -616 | 26.70 | 0.94 |
| 4.70 | -548 | 4.70 | -616 | 26.71 | 0.94 |
| 4.71 | -547 | 4.71 | -615 | 26.72 | 0.94 |
| 4.72 | -546 | 4.72 | -616 | 26.73 | 0.94 |
| 4.73 | -545 | 4.73 | -616 | 26.73 | 0.94 |
| 4.73 | -545 | 4.73 | -616 | 26.74 | 0.94 |
| 4.74 | -545 | 4.74 | -616 | 26.75 | 0.94 |
| 4.75 | -545 | 4.75 | -615 | 26.76 | 0.94 |
| 4.76 | -544 | 4.76 | -615 | 26.77 | 0.94 |
| 4.77 | -544 | 4.77 | -614 | 26.78 | 0.95 |
| 4.78 | -543 | 4.78 | -614 | 26.78 | 0.95 |
| 4.78 | -542 | 4.78 | -614 | 26.79 | 0.95 |
| 4.79 | -541 | 4.79 | -613 | 26.80 | 0.95 |
| 4.80 | -541 | 4.80 | -613 | 26.81 | 0.95 |
| 4.81 | -540 | 4.81 | -613 | 26.82 | 0.95 |
| 4.82 | -540 | 4.82 | -613 | 26.83 | 0.95 |
| 4.83 | -540 | 4.83 | -612 | 26.83 | 0.95 |
| 4.83 | -540 | 4.83 | -612 | 26.84 | 0.95 |
| 4.84 | -540 | 4.84 | -612 | 26.85 | 0.95 |
| 4.85 | -540 | 4.85 | -612 | 26.86 | 0.95 |
| 4.86 | -541 | 4.86 | -612 | 26.87 | 0.95 |
| 4.87 | -541 | 4.87 | -612 | 26.88 | 0.95 |
| 4.88 | -540 | 4.88 | -613 | 26.88 | 0.95 |
| 4.88 | -539 | 4.88 | -613 | 26.89 | 0.95 |
| 4.89 | -538 | 4.89 | -613 | 26.90 | 0.95 |
| 4.90 | -538 | 4.90 | -613 | 26.91 | 0.95 |
| 4.91 | -538 | 4.91 | -613 | 26.92 | 0.96 |
| 4.92 | -538 | 4.92 | -613 | 26.93 | 0.96 |
| 4.93 | -538 | 4.93 | -613 | 26.93 | 0.96 |
| 4.93 | -538 | 4.93 | -613 | 26.94 | 0.96 |
| 4.94 | -537 | 4.94 | -612 | 26.95 | 0.96 |
| 4.95 | -537 | 4.95 | -612 | 26.96 | 0.96 |

|      |      |      |      |       |      |
|------|------|------|------|-------|------|
| 4.96 | -536 | 4.96 | -612 | 26.97 | 0.96 |
| 4.97 | -536 | 4.97 | -612 | 26.98 | 0.96 |
| 4.98 | -536 | 4.98 | -612 | 26.98 | 0.96 |
| 4.98 | -535 | 4.98 | -612 | 26.99 | 0.96 |
| 4.99 | -535 | 4.99 | -612 | 27.00 | 0.96 |
| 5.00 | -535 | 5.00 | -612 | 27.01 | 0.96 |
| 5.01 | -535 | 5.01 | -611 | 27.02 | 0.96 |
| 5.02 | -534 | 5.02 | -611 | 27.03 | 0.97 |
| 5.03 | -534 | 5.03 | -610 | 27.03 | 0.97 |
| 5.03 | -534 | 5.03 | -610 | 27.04 | 0.97 |
| 5.04 | -534 | 5.04 | -610 | 27.05 | 0.97 |
| 5.05 | -534 | 5.05 | -609 | 27.06 | 0.97 |
| 5.06 | -533 | 5.06 | -609 | 27.07 | 0.97 |
| 5.07 | -533 | 5.07 | -608 | 27.08 | 0.97 |
| 5.08 | -533 | 5.08 | -607 | 27.08 | 0.97 |
| 5.08 | -532 | 5.08 | -607 | 27.09 | 0.97 |
| 5.09 | -532 | 5.09 | -607 | 27.10 | 0.97 |
| 5.10 | -531 | 5.10 | -607 | 27.11 | 0.97 |
| 5.11 | -531 | 5.11 | -607 | 27.12 | 0.97 |
| 5.12 | -530 | 5.12 | -607 | 27.13 | 0.97 |
| 5.13 | -530 | 5.13 | -607 | 27.13 | 0.97 |
| 5.13 | -530 | 5.13 | -607 | 27.14 | 0.97 |
| 5.14 | -531 | 5.14 | -606 | 27.15 | 0.97 |
| 5.15 | -530 | 5.15 | -606 | 27.16 | 0.97 |
| 5.16 | -530 | 5.16 | -606 | 27.17 | 0.97 |
| 5.17 | -529 | 5.17 | -605 | 27.18 | 0.97 |
| 5.18 | -528 | 5.18 | -605 | 27.18 | 0.97 |
| 5.18 | -527 | 5.18 | -604 | 27.19 | 0.97 |
| 5.19 | -526 | 5.19 | -604 | 27.20 | 0.98 |
| 5.20 | -526 | 5.20 | -603 | 27.21 | 0.98 |
| 5.21 | -526 | 5.21 | -603 | 27.22 | 0.98 |
| 5.22 | -526 | 5.22 | -603 | 27.23 | 0.98 |
| 5.23 | -526 | 5.23 | -602 | 27.23 | 0.98 |
| 5.23 | -526 | 5.23 | -603 | 27.24 | 0.98 |
| 5.24 | -527 | 5.24 | -603 | 27.25 | 0.98 |
| 5.25 | -527 | 5.25 | -603 | 27.26 | 0.98 |
| 5.26 | -527 | 5.26 | -602 | 27.27 | 0.98 |
| 5.27 | -527 | 5.27 | -601 | 27.28 | 0.98 |
| 5.28 | -527 | 5.28 | -601 | 27.28 | 0.98 |
| 5.28 | -527 | 5.28 | -601 | 27.29 | 0.98 |
| 5.29 | -526 | 5.29 | -600 | 27.30 | 0.98 |
| 5.30 | -526 | 5.30 | -600 | 27.31 | 0.98 |
| 5.31 | -526 | 5.31 | -600 | 27.32 | 0.99 |

|      |      |      |      |       |      |
|------|------|------|------|-------|------|
| 5.32 | -525 | 5.32 | -601 | 27.33 | 0.99 |
| 5.33 | -524 | 5.33 | -600 | 27.33 | 0.99 |
| 5.33 | -524 | 5.33 | -600 | 27.34 | 0.99 |
| 5.34 | -523 | 5.34 | -599 | 27.35 | 0.99 |
| 5.35 | -524 | 5.35 | -600 | 27.36 | 0.99 |
| 5.36 | -524 | 5.36 | -600 | 27.37 | 0.99 |
| 5.37 | -523 | 5.37 | -599 | 27.38 | 0.99 |
| 5.38 | -523 | 5.38 | -599 | 27.38 | 0.99 |
| 5.38 | -522 | 5.38 | -598 | 27.39 | 0.99 |
| 5.39 | -522 | 5.39 | -598 | 27.40 | 0.99 |
| 5.40 | -522 | 5.40 | -598 | 27.41 | 0.99 |
| 5.41 | -522 | 5.41 | -599 | 27.42 | 0.99 |
| 5.42 | -521 | 5.42 | -599 | 27.43 | 0.99 |
| 5.43 | -521 | 5.43 | -598 | 27.43 | 1.00 |
| 5.43 | -521 | 5.43 | -598 | 27.44 | 1.00 |
| 5.44 | -522 | 5.44 | -598 | 27.45 | 1.00 |
| 5.45 | -521 | 5.45 | -597 | 27.46 | 1.00 |
| 5.46 | -521 | 5.46 | -597 | 27.47 | 1.00 |
| 5.47 | -521 | 5.47 | -596 | 27.48 | 1.00 |
| 5.48 | -521 | 5.48 | -596 | 27.48 | 1.00 |
| 5.48 | -521 | 5.48 | -596 | 27.49 | 1.00 |
| 5.49 | -521 | 5.49 | -595 | 27.50 | 1.00 |
| 5.50 | -521 | 5.50 | -595 | 27.51 | 1.00 |
| 5.51 | -520 | 5.51 | -595 | 27.52 | 1.00 |
| 5.52 | -519 | 5.52 | -594 | 27.53 | 1.00 |
| 5.53 | -519 | 5.53 | -594 | 27.53 | 1.00 |
| 5.53 | -519 | 5.53 | -594 | 27.54 | 1.00 |
| 5.54 | -518 | 5.54 | -594 | 27.55 | 1.00 |
| 5.55 | -519 | 5.55 | -593 | 27.56 | 1.00 |
| 5.56 | -518 | 5.56 | -593 | 27.57 | 1.00 |
| 5.57 | -518 | 5.57 | -592 | 27.58 | 1.00 |
| 5.58 | -517 | 5.58 | -592 | 27.58 | 1.00 |
| 5.58 | -517 | 5.58 | -591 | 27.59 | 1.00 |
| 5.59 | -517 | 5.59 | -590 | 27.60 | 1.01 |
| 5.60 | -517 | 5.60 | -589 | 27.61 | 1.01 |
| 5.61 | -516 | 5.61 | -588 | 27.62 | 1.01 |
| 5.62 | -516 | 5.62 | -588 | 27.63 | 1.01 |
| 5.63 | -515 | 5.63 | -588 | 27.63 | 1.01 |
| 5.63 | -514 | 5.63 | -588 | 27.64 | 1.01 |
| 5.64 | -513 | 5.64 | -588 | 27.65 | 1.01 |
| 5.65 | -513 | 5.65 | -588 | 27.66 | 1.01 |
| 5.66 | -513 | 5.66 | -587 | 27.67 | 1.01 |
| 5.67 | -513 | 5.67 | -586 | 27.68 | 1.01 |

|      |      |      |      |       |      |
|------|------|------|------|-------|------|
| 5.68 | -513 | 5.68 | -585 | 27.68 | 1.01 |
| 5.68 | -513 | 5.68 | -584 | 27.69 | 1.01 |
| 5.69 | -513 | 5.69 | -584 | 27.70 | 1.01 |
| 5.70 | -513 | 5.70 | -584 | 27.71 | 1.01 |
| 5.71 | -513 | 5.71 | -584 | 27.72 | 1.01 |
| 5.72 | -513 | 5.72 | -584 | 27.73 | 1.01 |
| 5.73 | -513 | 5.73 | -584 | 27.73 | 1.01 |
| 5.73 | -513 | 5.73 | -584 | 27.74 | 1.01 |
| 5.74 | -513 | 5.74 | -584 | 27.75 | 1.01 |
| 5.75 | -513 | 5.75 | -584 | 27.76 | 1.01 |
| 5.76 | -513 | 5.76 | -584 | 27.77 | 1.01 |
| 5.77 | -512 | 5.77 | -585 | 27.78 | 1.01 |
| 5.78 | -512 | 5.78 | -585 | 27.78 | 1.01 |
| 5.78 | -511 | 5.78 | -584 | 27.79 | 1.01 |
| 5.79 | -511 | 5.79 | -583 | 27.80 | 1.01 |
| 5.80 | -511 | 5.80 | -583 | 27.81 | 1.01 |
| 5.81 | -510 | 5.81 | -583 | 27.82 | 1.01 |
| 5.82 | -509 | 5.82 | -582 | 27.83 | 1.01 |
| 5.83 | -508 | 5.83 | -581 | 27.83 | 1.01 |
| 5.83 | -508 | 5.83 | -581 | 27.84 | 1.01 |
| 5.84 | -507 | 5.84 | -581 | 27.85 | 1.01 |
| 5.85 | -506 | 5.85 | -581 | 27.86 | 1.01 |
| 5.86 | -505 | 5.86 | -581 | 27.87 | 1.02 |
| 5.87 | -505 | 5.87 | -582 | 27.88 | 1.02 |
| 5.88 | -504 | 5.88 | -581 | 27.88 | 1.02 |
| 5.88 | -504 | 5.88 | -581 | 27.89 | 1.02 |
| 5.89 | -504 | 5.89 | -580 | 27.90 | 1.02 |
| 5.90 | -504 | 5.90 | -580 | 27.91 | 1.02 |
| 5.91 | -503 | 5.91 | -580 | 27.92 | 1.01 |
| 5.92 | -503 | 5.92 | -580 | 27.93 | 1.01 |
| 5.93 | -503 | 5.93 | -580 | 27.93 | 1.02 |
| 5.93 | -503 | 5.93 | -580 | 27.94 | 1.02 |
| 5.94 | -503 | 5.94 | -579 | 27.95 | 1.02 |
| 5.95 | -503 | 5.95 | -578 | 27.96 | 1.02 |
| 5.96 | -502 | 5.96 | -578 | 27.97 | 1.02 |
| 5.97 | -502 | 5.97 | -578 | 27.98 | 1.02 |
| 5.98 | -502 | 5.98 | -578 | 27.98 | 1.02 |
| 5.98 | -502 | 5.98 | -578 | 27.99 | 1.02 |
| 5.99 | -501 | 5.99 | -578 | 28.00 | 1.02 |
| 6.00 | -501 | 6.00 | -577 |       |      |
| 6.01 | -501 | 6.01 | -577 |       |      |
| 6.02 | -501 | 6.02 | -577 |       |      |
| 6.03 | -500 | 6.03 | -577 |       |      |

|      |      |      |      |
|------|------|------|------|
| 6.03 | -500 | 6.03 | -577 |
| 6.04 | -499 | 6.04 | -577 |
| 6.05 | -498 | 6.05 | -576 |
| 6.06 | -498 | 6.06 | -575 |
| 6.07 | -497 | 6.07 | -575 |
| 6.08 | -496 | 6.08 | -575 |
| 6.08 | -496 | 6.08 | -574 |
| 6.09 | -496 | 6.09 | -574 |
| 6.10 | -496 | 6.10 | -573 |
| 6.11 | -496 | 6.11 | -572 |
| 6.12 | -496 | 6.12 | -572 |
| 6.13 | -495 | 6.13 | -572 |
| 6.13 | -495 | 6.13 | -571 |
| 6.14 | -496 | 6.14 | -570 |
| 6.15 | -496 | 6.15 | -570 |
| 6.16 | -495 | 6.16 | -570 |
| 6.17 | -495 | 6.17 | -570 |
| 6.18 | -494 | 6.18 | -571 |
| 6.18 | -494 | 6.18 | -571 |
| 6.19 | -493 | 6.19 | -570 |
| 6.20 | -493 | 6.20 | -570 |
| 6.21 | -493 | 6.21 | -569 |
| 6.22 | -493 | 6.22 | -569 |
| 6.23 | -493 | 6.23 | -568 |
| 6.23 | -493 | 6.23 | -568 |
| 6.24 | -493 | 6.24 | -568 |
| 6.25 | -493 | 6.25 | -568 |
| 6.26 | -493 | 6.26 | -568 |
| 6.27 | -493 | 6.27 | -568 |
| 6.28 | -493 | 6.28 | -567 |
| 6.28 | -493 | 6.28 | -567 |
| 6.29 | -493 | 6.29 | -567 |
| 6.30 | -492 | 6.30 | -567 |
| 6.31 | -492 | 6.31 | -567 |
| 6.32 | -491 | 6.32 | -568 |
| 6.33 | -491 | 6.33 | -568 |
| 6.33 | -491 | 6.33 | -568 |
| 6.34 | -491 | 6.34 | -567 |
| 6.35 | -491 | 6.35 | -567 |
| 6.36 | -490 | 6.36 | -567 |
| 6.37 | -490 | 6.37 | -567 |
| 6.38 | -490 | 6.38 | -566 |
| 6.38 | -489 | 6.38 | -566 |



|      |      |      |      |
|------|------|------|------|
| 6.39 | -488 | 6.39 | -565 |
| 6.40 | -488 | 6.40 | -565 |
| 6.41 | -487 | 6.41 | -565 |
| 6.42 | -486 | 6.42 | -565 |
| 6.43 | -486 | 6.43 | -565 |
| 6.43 | -486 | 6.43 | -564 |
| 6.44 | -486 | 6.44 | -564 |
| 6.45 | -485 | 6.45 | -564 |
| 6.46 | -486 | 6.46 | -563 |
| 6.47 | -486 | 6.47 | -563 |
| 6.48 | -486 | 6.48 | -563 |
| 6.48 | -485 | 6.48 | -562 |
| 6.49 | -485 | 6.49 | -562 |
| 6.50 | -484 | 6.50 | -561 |
| 6.51 | -483 | 6.51 | -561 |
| 6.52 | -482 | 6.52 | -562 |
| 6.53 | -482 | 6.53 | -561 |
| 6.53 | -482 | 6.53 | -561 |
| 6.54 | -482 | 6.54 | -560 |
| 6.55 | -482 | 6.55 | -560 |
| 6.56 | -482 | 6.56 | -559 |
| 6.57 | -482 | 6.57 | -560 |
| 6.58 | -481 | 6.58 | -560 |
| 6.58 | -481 | 6.58 | -560 |
| 6.59 | -480 | 6.59 | -560 |
| 6.60 | -481 | 6.60 | -560 |
| 6.61 | -481 | 6.61 | -560 |
| 6.62 | -480 | 6.62 | -560 |
| 6.63 | -480 | 6.63 | -559 |
| 6.63 | -479 | 6.63 | -560 |
| 6.64 | -479 | 6.64 | -559 |
| 6.65 | -479 | 6.65 | -559 |
| 6.66 | -479 | 6.66 | -559 |
| 6.67 | -479 | 6.67 | -560 |
| 6.68 | -480 | 6.68 | -560 |
| 6.68 | -479 | 6.68 | -559 |
| 6.69 | -479 | 6.69 | -558 |
| 6.70 | -479 | 6.70 | -558 |
| 6.71 | -480 | 6.71 | -558 |
| 6.72 | -480 | 6.72 | -558 |
| 6.73 | -479 | 6.73 | -559 |
| 6.73 | -479 | 6.73 | -559 |
| 6.74 | -478 | 6.74 | -559 |

|      |      |      |      |
|------|------|------|------|
| 6.75 | -479 | 6.75 | -558 |
| 6.76 | -479 | 6.76 | -557 |
| 6.77 | -479 | 6.77 | -556 |
| 6.78 | -478 | 6.78 | -555 |
| 6.78 | -478 | 6.78 | -555 |
| 6.79 | -477 | 6.79 | -555 |
| 6.80 | -476 | 6.80 | -555 |
| 6.81 | -476 | 6.81 | -555 |
| 6.82 | -475 | 6.82 | -555 |
| 6.83 | -475 | 6.83 | -555 |
| 6.83 | -474 | 6.83 | -554 |
| 6.84 | -474 | 6.84 | -553 |
| 6.85 | -473 | 6.85 | -553 |
| 6.86 | -473 | 6.86 | -553 |
| 6.87 | -473 | 6.87 | -553 |
| 6.88 | -473 | 6.88 | -553 |
| 6.88 | -472 | 6.88 | -553 |
| 6.89 | -472 | 6.89 | -552 |
| 6.90 | -471 | 6.90 | -552 |
| 6.91 | -471 | 6.91 | -552 |
| 6.92 | -470 | 6.92 | -552 |
| 6.93 | -470 | 6.93 | -552 |
| 6.93 | -470 | 6.93 | -552 |
| 6.94 | -469 | 6.94 | -552 |
| 6.95 | -470 | 6.95 | -552 |
| 6.96 | -470 | 6.96 | -552 |
| 6.97 | -470 | 6.97 | -552 |
| 6.98 | -470 | 6.98 | -552 |
| 6.98 | -470 | 6.98 | -553 |
| 6.99 | -470 | 6.99 | -552 |
| 7.00 | -469 | 7.00 | -552 |
| 7.01 | -469 | 7.01 | -552 |
| 7.02 | -468 | 7.02 | -551 |
| 7.03 | -467 | 7.03 | -551 |
| 7.03 | -466 | 7.03 | -550 |
| 7.04 | -466 | 7.04 | -550 |
| 7.05 | -466 | 7.05 | -550 |
| 7.06 | -466 | 7.06 | -550 |
| 7.07 | -466 | 7.07 | -549 |
| 7.08 | -466 | 7.08 | -549 |
| 7.08 | -466 | 7.08 | -549 |
| 7.09 | -467 | 7.09 | -548 |
| 7.10 | -467 | 7.10 | -548 |

|      |      |      |      |
|------|------|------|------|
| 7.11 | -467 | 7.11 | -548 |
| 7.12 | -467 | 7.12 | -547 |
| 7.13 | -466 | 7.13 | -547 |
| 7.13 | -465 | 7.13 | -547 |
| 7.14 | -465 | 7.14 | -548 |
| 7.15 | -464 | 7.15 | -548 |
| 7.16 | -463 | 7.16 | -548 |
| 7.17 | -463 | 7.17 | -548 |
| 7.18 | -462 | 7.18 | -548 |
| 7.18 | -462 | 7.18 | -548 |
| 7.19 | -461 | 7.19 | -548 |
| 7.20 | -461 | 7.20 | -548 |
| 7.21 | -461 | 7.21 | -547 |
| 7.22 | -461 | 7.22 | -546 |
| 7.23 | -460 | 7.23 | -545 |
| 7.23 | -460 | 7.23 | -545 |
| 7.24 | -459 | 7.24 | -545 |
| 7.25 | -458 | 7.25 | -544 |
| 7.26 | -458 | 7.26 | -544 |
| 7.27 | -458 | 7.27 | -544 |
| 7.28 | -458 | 7.28 | -543 |
| 7.28 | -458 | 7.28 | -543 |
| 7.29 | -457 | 7.29 | -543 |
| 7.30 | -457 | 7.30 | -542 |
| 7.31 | -457 | 7.31 | -542 |
| 7.32 | -457 | 7.32 | -541 |
| 7.33 | -456 | 7.33 | -541 |
| 7.33 | -456 | 7.33 | -541 |
| 7.34 | -456 | 7.34 | -541 |
| 7.35 | -455 | 7.35 | -541 |
| 7.36 | -455 | 7.36 | -540 |
| 7.37 | -455 | 7.37 | -540 |
| 7.38 | -454 | 7.38 | -540 |
| 7.38 | -454 | 7.38 | -540 |
| 7.39 | -453 | 7.39 | -540 |
| 7.40 | -453 | 7.40 | -540 |
| 7.41 | -453 | 7.41 | -540 |
| 7.42 | -452 | 7.42 | -539 |
| 7.43 | -452 | 7.43 | -539 |
| 7.43 | -453 | 7.43 | -539 |
| 7.44 | -453 | 7.44 | -539 |
| 7.45 | -453 | 7.45 | -539 |
| 7.46 | -452 | 7.46 | -538 |

|      |      |      |      |
|------|------|------|------|
| 7.47 | -451 | 7.47 | -538 |
| 7.48 | -451 | 7.48 | -537 |
| 7.48 | -451 | 7.48 | -537 |
| 7.49 | -450 | 7.49 | -537 |
| 7.50 | -451 | 7.50 | -537 |
| 7.51 | -451 | 7.51 | -538 |
| 7.52 | -451 | 7.52 | -538 |
| 7.53 | -451 | 7.53 | -538 |
| 7.53 | -450 | 7.53 | -538 |
| 7.54 | -450 | 7.54 | -538 |
| 7.55 | -449 | 7.55 | -537 |
| 7.56 | -449 | 7.56 | -536 |
| 7.57 | -449 | 7.57 | -536 |
| 7.58 | -449 | 7.58 | -536 |
| 7.58 | -449 | 7.58 | -535 |
| 7.59 | -449 | 7.59 | -535 |
| 7.60 | -448 | 7.60 | -534 |
| 7.61 | -448 | 7.61 | -533 |
| 7.62 | -448 | 7.62 | -533 |
| 7.63 | -448 | 7.63 | -533 |
| 7.63 | -447 | 7.63 | -533 |
| 7.64 | -447 | 7.64 | -533 |
| 7.65 | -446 | 7.65 | -533 |
| 7.66 | -447 | 7.66 | -533 |
| 7.67 | -447 | 7.67 | -532 |
| 7.68 | -446 | 7.68 | -531 |
| 7.68 | -446 | 7.68 | -531 |
| 7.69 | -446 | 7.69 | -531 |
| 7.70 | -447 | 7.70 | -531 |
| 7.71 | -446 | 7.71 | -530 |
| 7.72 | -446 | 7.72 | -530 |
| 7.73 | -446 | 7.73 | -530 |
| 7.73 | -446 | 7.73 | -530 |
| 7.74 | -446 | 7.74 | -530 |
| 7.75 | -446 | 7.75 | -529 |
| 7.76 | -445 | 7.76 | -529 |
| 7.77 | -444 | 7.77 | -528 |
| 7.78 | -444 | 7.78 | -527 |
| 7.78 | -444 | 7.78 | -527 |
| 7.79 | -444 | 7.79 | -526 |
| 7.80 | -444 | 7.80 | -525 |
| 7.81 | -444 | 7.81 | -524 |
| 7.82 | -444 | 7.82 | -524 |

|      |      |      |      |
|------|------|------|------|
| 7.83 | -443 | 7.83 | -524 |
| 7.83 | -444 | 7.83 | -524 |
| 7.84 | -444 | 7.84 | -523 |
| 7.85 | -443 | 7.85 | -524 |
| 7.86 | -442 | 7.86 | -524 |
| 7.87 | -442 | 7.87 | -524 |
| 7.88 | -441 | 7.88 | -524 |
| 7.88 | -441 | 7.88 | -523 |
| 7.89 | -441 | 7.89 | -522 |
| 7.90 | -441 | 7.90 | -522 |
| 7.91 | -441 | 7.91 | -521 |
| 7.92 | -441 | 7.92 | -521 |
| 7.93 | -440 | 7.93 | -521 |
| 7.93 | -440 | 7.93 | -521 |
| 7.94 | -440 | 7.94 | -521 |
| 7.95 | -440 | 7.95 | -521 |
| 7.96 | -439 | 7.96 | -521 |
| 7.97 | -439 | 7.97 | -521 |
| 7.98 | -438 | 7.98 | -521 |
| 7.98 | -438 | 7.98 | -520 |
| 7.99 | -438 | 7.99 | -518 |
| 8.00 | -437 | 8.00 | -517 |
| 8.01 | -437 | 8.01 | -517 |
| 8.02 | -437 | 8.02 | -517 |
| 8.03 | -436 | 8.03 | -517 |
| 8.03 | -436 | 8.03 | -517 |
| 8.04 | -435 | 8.04 | -517 |
| 8.05 | -434 | 8.05 | -517 |
| 8.06 | -434 | 8.06 | -517 |
| 8.07 | -433 | 8.07 | -518 |
| 8.08 | -433 | 8.08 | -518 |
| 8.08 | -434 | 8.08 | -518 |
| 8.09 | -434 | 8.09 | -518 |
| 8.10 | -433 | 8.10 | -518 |
| 8.11 | -433 | 8.11 | -518 |
| 8.12 | -433 | 8.12 | -518 |
| 8.13 | -434 | 8.13 | -519 |
| 8.13 | -434 | 8.13 | -519 |
| 8.14 | -433 | 8.14 | -520 |
| 8.15 | -433 | 8.15 | -520 |
| 8.16 | -432 | 8.16 | -520 |
| 8.17 | -431 | 8.17 | -520 |
| 8.18 | -430 | 8.18 | -520 |

|      |      |      |      |
|------|------|------|------|
| 8.18 | -430 | 8.18 | -519 |
| 8.19 | -430 | 8.19 | -518 |
| 8.20 | -430 | 8.20 | -518 |
| 8.21 | -429 | 8.21 | -518 |
| 8.22 | -429 | 8.22 | -517 |
| 8.23 | -428 | 8.23 | -517 |
| 8.23 | -428 | 8.23 | -516 |
| 8.24 | -428 | 8.24 | -515 |
| 8.25 | -427 | 8.25 | -515 |
| 8.26 | -427 | 8.26 | -515 |
| 8.27 | -427 | 8.27 | -515 |
| 8.28 | -427 | 8.28 | -515 |
| 8.28 | -427 | 8.28 | -515 |
| 8.29 | -426 | 8.29 | -515 |
| 8.30 | -426 | 8.30 | -516 |
| 8.31 | -426 | 8.31 | -516 |
| 8.32 | -426 | 8.32 | -515 |
| 8.33 | -426 | 8.33 | -515 |
| 8.33 | -426 | 8.33 | -514 |
| 8.34 | -426 | 8.34 | -514 |
| 8.35 | -425 | 8.35 | -514 |
| 8.36 | -425 | 8.36 | -514 |
| 8.37 | -425 | 8.37 | -514 |
| 8.38 | -425 | 8.38 | -514 |
| 8.38 | -425 | 8.38 | -514 |
| 8.39 | -425 | 8.39 | -514 |
| 8.40 | -425 | 8.40 | -513 |
| 8.41 | -424 | 8.41 | -512 |
| 8.42 | -424 | 8.42 | -512 |
| 8.43 | -423 | 8.43 | -511 |
| 8.43 | -422 | 8.43 | -510 |
| 8.44 | -421 | 8.44 | -510 |
| 8.45 | -420 | 8.45 | -509 |
| 8.46 | -419 | 8.46 | -508 |
| 8.47 | -419 | 8.47 | -507 |
| 8.48 | -419 | 8.48 | -506 |
| 8.48 | -419 | 8.48 | -506 |
| 8.49 | -419 | 8.49 | -506 |
| 8.50 | -418 | 8.50 | -506 |
| 8.51 | -418 | 8.51 | -505 |
| 8.52 | -418 | 8.52 | -505 |
| 8.53 | -418 | 8.53 | -505 |
| 8.53 | -418 | 8.53 | -505 |

|      |      |      |      |
|------|------|------|------|
| 8.54 | -418 | 8.54 | -504 |
| 8.55 | -418 | 8.55 | -503 |
| 8.56 | -418 | 8.56 | -503 |
| 8.57 | -417 | 8.57 | -503 |
| 8.58 | -417 | 8.58 | -503 |
| 8.58 | -416 | 8.58 | -502 |
| 8.59 | -415 | 8.59 | -502 |
| 8.60 | -415 | 8.60 | -503 |
| 8.61 | -415 | 8.61 | -503 |
| 8.62 | -415 | 8.62 | -502 |
| 8.63 | -414 | 8.63 | -502 |
| 8.63 | -414 | 8.63 | -501 |
| 8.64 | -413 | 8.64 | -500 |
| 8.65 | -413 | 8.65 | -500 |
| 8.66 | -412 | 8.66 | -499 |
| 8.67 | -412 | 8.67 | -499 |
| 8.68 | -412 | 8.68 | -499 |
| 8.68 | -412 | 8.68 | -499 |
| 8.69 | -412 | 8.69 | -498 |
| 8.70 | -412 | 8.70 | -498 |
| 8.71 | -412 | 8.71 | -498 |
| 8.72 | -413 | 8.72 | -498 |
| 8.73 | -413 | 8.73 | -498 |
| 8.73 | -413 | 8.73 | -498 |
| 8.74 | -413 | 8.74 | -498 |
| 8.75 | -413 | 8.75 | -497 |
| 8.76 | -412 | 8.76 | -497 |
| 8.77 | -412 | 8.77 | -496 |
| 8.78 | -412 | 8.78 | -496 |
| 8.78 | -411 | 8.78 | -496 |
| 8.79 | -411 | 8.79 | -496 |
| 8.80 | -410 | 8.80 | -495 |
| 8.81 | -409 | 8.81 | -495 |
| 8.82 | -409 | 8.82 | -496 |
| 8.83 | -409 | 8.83 | -496 |
| 8.83 | -409 | 8.83 | -496 |
| 8.84 | -409 | 8.84 | -496 |
| 8.85 | -409 | 8.85 | -496 |
| 8.86 | -408 | 8.86 | -496 |
| 8.87 | -408 | 8.87 | -496 |
| 8.88 | -407 | 8.88 | -495 |
| 8.88 | -407 | 8.88 | -495 |
| 8.89 | -406 | 8.89 | -494 |

|      |      |      |      |
|------|------|------|------|
| 8.90 | -406 | 8.90 | -493 |
| 8.91 | -406 | 8.91 | -492 |
| 8.92 | -406 | 8.92 | -491 |
| 8.93 | -406 | 8.93 | -492 |
| 8.93 | -407 | 8.93 | -492 |
| 8.94 | -407 | 8.94 | -492 |
| 8.95 | -407 | 8.95 | -493 |
| 8.96 | -406 | 8.96 | -493 |
| 8.97 | -406 | 8.97 | -493 |
| 8.98 | -406 | 8.98 | -493 |
| 8.98 | -405 | 8.98 | -493 |
| 8.99 | -404 | 8.99 | -492 |
| 9.00 | -404 | 9.00 | -492 |
| 9.01 | -403 | 9.01 | -492 |
| 9.02 | -403 | 9.02 | -492 |
| 9.03 | -402 | 9.03 | -492 |
| 9.03 | -401 | 9.03 | -492 |
| 9.04 | -401 | 9.04 | -492 |
| 9.05 | -401 | 9.05 | -491 |
| 9.06 | -400 | 9.06 | -492 |
| 9.07 | -399 | 9.07 | -492 |
| 9.08 | -398 | 9.08 | -492 |
| 9.08 | -397 | 9.08 | -491 |
| 9.09 | -397 | 9.09 | -491 |
| 9.10 | -397 | 9.10 | -491 |
| 9.11 | -397 | 9.11 | -491 |
| 9.12 | -397 | 9.12 | -491 |
| 9.13 | -397 | 9.13 | -490 |
| 9.13 | -397 | 9.13 | -490 |
| 9.14 | -396 | 9.14 | -489 |
| 9.15 | -396 | 9.15 | -489 |
| 9.16 | -395 | 9.16 | -489 |
| 9.17 | -394 | 9.17 | -489 |
| 9.18 | -393 | 9.18 | -489 |
| 9.18 | -392 | 9.18 | -489 |
| 9.19 | -391 | 9.19 | -489 |
| 9.20 | -391 | 9.20 | -489 |
| 9.21 | -391 | 9.21 | -488 |
| 9.22 | -391 | 9.22 | -488 |
| 9.23 | -390 | 9.23 | -488 |
| 9.23 | -390 | 9.23 | -488 |
| 9.24 | -389 | 9.24 | -488 |
| 9.25 | -389 | 9.25 | -488 |



|      |      |      |      |
|------|------|------|------|
| 9.26 | -389 | 9.26 | -488 |
| 9.27 | -389 | 9.27 | -488 |
| 9.28 | -389 | 9.28 | -488 |
| 9.28 | -388 | 9.28 | -487 |
| 9.29 | -388 | 9.29 | -487 |
| 9.30 | -389 | 9.30 | -487 |
| 9.31 | -389 | 9.31 | -487 |
| 9.32 | -389 | 9.32 | -486 |
| 9.33 | -389 | 9.33 | -486 |
| 9.33 | -388 | 9.33 | -485 |
| 9.34 | -388 | 9.34 | -485 |
| 9.35 | -388 | 9.35 | -485 |
| 9.36 | -388 | 9.36 | -485 |
| 9.37 | -388 | 9.37 | -485 |
| 9.38 | -388 | 9.38 | -484 |
| 9.38 | -388 | 9.38 | -483 |
| 9.39 | -388 | 9.39 | -483 |
| 9.40 | -388 | 9.40 | -483 |
| 9.41 | -388 | 9.41 | -482 |
| 9.42 | -389 | 9.42 | -482 |
| 9.43 | -389 | 9.43 | -482 |
| 9.43 | -390 | 9.43 | -481 |
| 9.44 | -390 | 9.44 | -481 |
| 9.45 | -391 | 9.45 | -480 |
| 9.46 | -391 | 9.46 | -479 |
| 9.47 | -391 | 9.47 | -478 |
| 9.48 | -391 | 9.48 | -478 |
| 9.48 | -391 | 9.48 | -477 |
| 9.49 | -391 | 9.49 | -477 |
| 9.50 | -392 | 9.50 | -476 |
| 9.51 | -392 | 9.51 | -476 |
| 9.52 | -392 | 9.52 | -475 |
| 9.53 | -392 | 9.53 | -474 |
| 9.53 | -392 | 9.53 | -474 |
| 9.54 | -392 | 9.54 | -474 |
| 9.55 | -393 | 9.55 | -473 |
| 9.56 | -393 | 9.56 | -473 |
| 9.57 | -393 | 9.57 | -473 |
| 9.58 | -392 | 9.58 | -473 |
| 9.58 | -392 | 9.58 | -472 |
| 9.59 | -392 | 9.59 | -472 |
| 9.60 | -392 | 9.60 | -472 |
| 9.61 | -393 | 9.61 | -472 |

|      |      |      |      |
|------|------|------|------|
| 9.62 | -393 | 9.62 | -472 |
| 9.63 | -393 | 9.63 | -471 |
| 9.63 | -393 | 9.63 | -470 |
| 9.64 | -393 | 9.64 | -469 |
| 9.65 | -393 | 9.65 | -469 |
| 9.66 | -393 | 9.66 | -469 |
| 9.67 | -393 | 9.67 | -469 |
| 9.68 | -393 | 9.68 | -469 |
| 9.68 | -393 | 9.68 | -469 |
| 9.69 | -393 | 9.69 | -468 |
| 9.70 | -392 | 9.70 | -468 |
| 9.71 | -392 | 9.71 | -468 |
| 9.72 | -392 | 9.72 | -468 |
| 9.73 | -391 | 9.73 | -468 |
| 9.73 | -392 | 9.73 | -467 |
| 9.74 | -392 | 9.74 | -467 |
| 9.75 | -392 | 9.75 | -467 |
| 9.76 | -392 | 9.76 | -466 |
| 9.77 | -391 | 9.77 | -466 |
| 9.78 | -390 | 9.78 | -465 |
| 9.78 | -388 | 9.78 | -464 |
| 9.79 | -388 | 9.79 | -463 |
| 9.80 | -388 | 9.80 | -463 |
| 9.81 | -388 | 9.81 | -463 |
| 9.82 | -387 | 9.82 | -464 |
| 9.83 | -387 | 9.83 | -464 |
| 9.83 | -387 | 9.83 | -463 |
| 9.84 | -386 | 9.84 | -463 |
| 9.85 | -386 | 9.85 | -463 |
| 9.86 | -386 | 9.86 | -463 |
| 9.87 | -386 | 9.87 | -463 |
| 9.88 | -385 | 9.88 | -463 |
| 9.88 | -385 | 9.88 | -463 |
| 9.89 | -384 | 9.89 | -462 |
| 9.90 | -384 | 9.90 | -462 |
| 9.91 | -384 | 9.91 | -462 |
| 9.92 | -383 | 9.92 | -462 |
| 9.93 | -382 | 9.93 | -462 |
| 9.93 | -382 | 9.93 | -462 |
| 9.94 | -381 | 9.94 | -462 |
| 9.95 | -382 | 9.95 | -462 |
| 9.96 | -382 | 9.96 | -462 |
| 9.97 | -381 | 9.97 | -461 |

|       |      |       |      |
|-------|------|-------|------|
| 9.98  | -381 | 9.98  | -461 |
| 9.98  | -381 | 9.98  | -461 |
| 9.99  | -381 | 9.99  | -460 |
| 10.00 | -381 | 10.00 | -460 |
| 10.01 | -381 | 10.01 | -459 |
| 10.02 | -381 | 10.02 | -459 |
| 10.03 | -381 | 10.03 | -459 |
| 10.03 | -381 | 10.03 | -459 |
| 10.04 | -380 | 10.04 | -459 |
| 10.05 | -380 | 10.05 | -459 |
| 10.06 | -379 | 10.06 | -458 |
| 10.07 | -379 | 10.07 | -458 |
| 10.08 | -379 | 10.08 | -458 |
| 10.08 | -379 | 10.08 | -457 |
| 10.09 | -379 | 10.09 | -457 |
| 10.10 | -378 | 10.10 | -456 |
| 10.11 | -377 | 10.11 | -456 |
| 10.12 | -377 | 10.12 | -455 |
| 10.13 | -376 | 10.13 | -454 |
| 10.13 | -376 | 10.13 | -454 |
| 10.14 | -375 | 10.14 | -454 |
| 10.15 | -374 | 10.15 | -454 |
| 10.16 | -374 | 10.16 | -454 |
| 10.17 | -373 | 10.17 | -454 |
| 10.18 | -373 | 10.18 | -454 |
| 10.18 | -373 | 10.18 | -453 |
| 10.19 | -372 | 10.19 | -454 |
| 10.20 | -372 | 10.20 | -454 |
| 10.21 | -372 | 10.21 | -453 |
| 10.22 | -371 | 10.22 | -453 |
| 10.23 | -370 | 10.23 | -453 |
| 10.23 | -369 | 10.23 | -453 |
| 10.24 | -367 | 10.24 | -453 |
| 10.25 | -366 | 10.25 | -452 |
| 10.26 | -366 | 10.26 | -451 |
| 10.27 | -366 | 10.27 | -450 |
| 10.28 | -366 | 10.28 | -450 |
| 10.28 | -367 | 10.28 | -449 |
| 10.29 | -367 | 10.29 | -448 |
| 10.30 | -366 | 10.30 | -448 |
| 10.31 | -365 | 10.31 | -448 |
| 10.32 | -365 | 10.32 | -447 |
| 10.33 | -364 | 10.33 | -447 |

|       |      |       |      |
|-------|------|-------|------|
| 10.33 | -363 | 10.33 | -447 |
| 10.34 | -363 | 10.34 | -447 |
| 10.35 | -364 | 10.35 | -447 |
| 10.36 | -365 | 10.36 | -447 |
| 10.37 | -365 | 10.37 | -447 |
| 10.38 | -365 | 10.38 | -446 |
| 10.38 | -365 | 10.38 | -446 |
| 10.39 | -365 | 10.39 | -445 |
| 10.40 | -365 | 10.40 | -445 |
| 10.41 | -365 | 10.41 | -445 |
| 10.42 | -364 | 10.42 | -444 |
| 10.43 | -363 | 10.43 | -444 |
| 10.43 | -362 | 10.43 | -443 |
| 10.44 | -361 | 10.44 | -443 |
| 10.45 | -361 | 10.45 | -443 |
| 10.46 | -360 | 10.46 | -443 |
| 10.47 | -360 | 10.47 | -443 |
| 10.48 | -360 | 10.48 | -442 |
| 10.48 | -360 | 10.48 | -442 |
| 10.49 | -359 | 10.49 | -442 |
| 10.50 | -359 | 10.50 | -442 |
| 10.51 | -359 | 10.51 | -443 |
| 10.52 | -359 | 10.52 | -442 |
| 10.53 | -358 | 10.53 | -442 |
| 10.53 | -358 | 10.53 | -442 |
| 10.54 | -357 | 10.54 | -441 |
| 10.55 | -357 | 10.55 | -441 |
| 10.56 | -356 | 10.56 | -441 |
| 10.57 | -355 | 10.57 | -440 |
| 10.58 | -355 | 10.58 | -440 |
| 10.58 | -355 | 10.58 | -440 |
| 10.59 | -355 | 10.59 | -439 |
| 10.60 | -355 | 10.60 | -439 |
| 10.61 | -355 | 10.61 | -439 |
| 10.62 | -354 | 10.62 | -438 |
| 10.63 | -354 | 10.63 | -438 |
| 10.63 | -354 | 10.63 | -438 |
| 10.64 | -354 | 10.64 | -438 |
| 10.65 | -354 | 10.65 | -438 |
| 10.66 | -354 | 10.66 | -438 |
| 10.67 | -353 | 10.67 | -438 |
| 10.68 | -353 | 10.68 | -438 |
| 10.68 | -353 | 10.68 | -438 |

|       |      |       |      |
|-------|------|-------|------|
| 10.69 | -353 | 10.69 | -437 |
| 10.70 | -353 | 10.70 | -436 |
| 10.71 | -352 | 10.71 | -435 |
| 10.72 | -352 | 10.72 | -434 |
| 10.73 | -352 | 10.73 | -434 |
| 10.73 | -352 | 10.73 | -434 |
| 10.74 | -352 | 10.74 | -434 |
| 10.75 | -352 | 10.75 | -435 |
| 10.76 | -352 | 10.76 | -435 |
| 10.77 | -352 | 10.77 | -435 |
| 10.78 | -352 | 10.78 | -435 |
| 10.78 | -352 | 10.78 | -434 |
| 10.79 | -351 | 10.79 | -433 |
| 10.80 | -351 | 10.80 | -433 |
| 10.81 | -351 | 10.81 | -432 |
| 10.82 | -350 | 10.82 | -432 |
| 10.83 | -349 | 10.83 | -431 |
| 10.83 | -349 | 10.83 | -430 |
| 10.84 | -348 | 10.84 | -429 |
| 10.85 | -348 | 10.85 | -429 |
| 10.86 | -348 | 10.86 | -429 |
| 10.87 | -348 | 10.87 | -428 |
| 10.88 | -348 | 10.88 | -428 |
| 10.88 | -348 | 10.88 | -428 |
| 10.89 | -349 | 10.89 | -428 |
| 10.90 | -349 | 10.90 | -428 |
| 10.91 | -349 | 10.91 | -428 |
| 10.92 | -349 | 10.92 | -429 |
| 10.93 | -349 | 10.93 | -429 |
| 10.93 | -348 | 10.93 | -429 |
| 10.94 | -348 | 10.94 | -428 |
| 10.95 | -347 | 10.95 | -427 |
| 10.96 | -346 | 10.96 | -427 |
| 10.97 | -346 | 10.97 | -426 |
| 10.98 | -346 | 10.98 | -425 |
| 10.98 | -346 | 10.98 | -424 |
| 10.99 | -346 | 10.99 | -424 |
| 11.00 | -345 | 11.00 | -424 |
| 11.01 | -345 | 11.01 | -424 |
| 11.02 | -344 | 11.02 | -425 |
| 11.03 | -344 | 11.03 | -424 |
| 11.03 | -344 | 11.03 | -424 |
| 11.04 | -343 | 11.04 | -423 |

|       |      |       |      |
|-------|------|-------|------|
| 11.05 | -343 | 11.05 | -423 |
| 11.06 | -343 | 11.06 | -423 |
| 11.07 | -343 | 11.07 | -422 |
| 11.08 | -343 | 11.08 | -421 |
| 11.08 | -343 | 11.08 | -420 |
| 11.09 | -343 | 11.09 | -419 |
| 11.10 | -343 | 11.10 | -419 |
| 11.11 | -343 | 11.11 | -418 |
| 11.12 | -342 | 11.12 | -418 |
| 11.13 | -342 | 11.13 | -418 |
| 11.13 | -341 | 11.13 | -419 |
| 11.14 | -341 | 11.14 | -419 |
| 11.15 | -340 | 11.15 | -419 |
| 11.16 | -340 | 11.16 | -419 |
| 11.17 | -339 | 11.17 | -419 |
| 11.18 | -339 | 11.18 | -419 |
| 11.18 | -338 | 11.18 | -419 |
| 11.19 | -339 | 11.19 | -419 |
| 11.20 | -339 | 11.20 | -419 |
| 11.21 | -339 | 11.21 | -420 |
| 11.22 | -339 | 11.22 | -419 |
| 11.23 | -338 | 11.23 | -419 |
| 11.23 | -337 | 11.23 | -418 |
| 11.24 | -336 | 11.24 | -418 |
| 11.25 | -335 | 11.25 | -417 |
| 11.26 | -335 | 11.26 | -416 |
| 11.27 | -335 | 11.27 | -416 |
| 11.28 | -335 | 11.28 | -416 |
| 11.28 | -335 | 11.28 | -415 |
| 11.29 | -335 | 11.29 | -415 |
| 11.30 | -336 | 11.30 | -415 |
| 11.31 | -336 | 11.31 | -415 |
| 11.32 | -337 | 11.32 | -415 |
| 11.33 | -337 | 11.33 | -415 |
| 11.33 | -337 | 11.33 | -415 |
| 11.34 | -336 | 11.34 | -415 |
| 11.35 | -336 | 11.35 | -414 |
| 11.36 | -337 | 11.36 | -414 |
| 11.37 | -337 | 11.37 | -414 |
| 11.38 | -336 | 11.38 | -414 |
| 11.38 | -335 | 11.38 | -414 |
| 11.39 | -335 | 11.39 | -414 |
| 11.40 | -334 | 11.40 | -413 |

|       |      |       |      |
|-------|------|-------|------|
| 11.41 | -334 | 11.41 | -413 |
| 11.42 | -333 | 11.42 | -413 |
| 11.43 | -333 | 11.43 | -413 |
| 11.43 | -333 | 11.43 | -412 |
| 11.44 | -333 | 11.44 | -411 |
| 11.45 | -333 | 11.45 | -410 |
| 11.46 | -334 | 11.46 | -410 |
| 11.47 | -334 | 11.47 | -410 |
| 11.48 | -335 | 11.48 | -410 |
| 11.48 | -334 | 11.48 | -410 |
| 11.49 | -333 | 11.49 | -411 |
| 11.50 | -333 | 11.50 | -410 |
| 11.51 | -332 | 11.51 | -410 |
| 11.52 | -332 | 11.52 | -410 |
| 11.53 | -331 | 11.53 | -410 |
| 11.53 | -330 | 11.53 | -409 |
| 11.54 | -329 | 11.54 | -408 |
| 11.55 | -328 | 11.55 | -408 |
| 11.56 | -328 | 11.56 | -408 |
| 11.57 | -327 | 11.57 | -408 |
| 11.58 | -326 | 11.58 | -408 |
| 11.58 | -325 | 11.58 | -408 |
| 11.59 | -325 | 11.59 | -409 |
| 11.60 | -324 | 11.60 | -408 |
| 11.61 | -324 | 11.61 | -407 |
| 11.62 | -324 | 11.62 | -407 |
| 11.63 | -323 | 11.63 | -406 |
| 11.63 | -323 | 11.63 | -406 |
| 11.64 | -323 | 11.64 | -406 |
| 11.65 | -323 | 11.65 | -405 |
| 11.66 | -323 | 11.66 | -405 |
| 11.67 | -322 | 11.67 | -405 |
| 11.68 | -322 | 11.68 | -404 |
| 11.68 | -321 | 11.68 | -404 |
| 11.69 | -320 | 11.69 | -404 |
| 11.70 | -320 | 11.70 | -404 |
| 11.71 | -320 | 11.71 | -404 |
| 11.72 | -320 | 11.72 | -404 |
| 11.73 | -319 | 11.73 | -404 |
| 11.73 | -319 | 11.73 | -403 |
| 11.74 | -318 | 11.74 | -403 |
| 11.75 | -318 | 11.75 | -403 |
| 11.76 | -317 | 11.76 | -402 |

|       |      |       |      |
|-------|------|-------|------|
| 11.77 | -317 | 11.77 | -402 |
| 11.78 | -317 | 11.78 | -402 |
| 11.78 | -317 | 11.78 | -402 |
| 11.79 | -317 | 11.79 | -401 |
| 11.80 | -317 | 11.80 | -401 |
| 11.81 | -317 | 11.81 | -401 |
| 11.82 | -317 | 11.82 | -400 |
| 11.83 | -317 | 11.83 | -400 |
| 11.83 | -317 | 11.83 | -400 |
| 11.84 | -316 | 11.84 | -400 |
| 11.85 | -316 | 11.85 | -401 |
| 11.86 | -316 | 11.86 | -400 |
| 11.87 | -315 | 11.87 | -400 |
| 11.88 | -315 | 11.88 | -399 |
| 11.88 | -314 | 11.88 | -399 |
| 11.89 | -313 | 11.89 | -399 |
| 11.90 | -312 | 11.90 | -398 |
| 11.91 | -311 | 11.91 | -398 |
| 11.92 | -310 | 11.92 | -398 |
| 11.93 | -309 | 11.93 | -398 |
| 11.93 | -309 | 11.93 | -397 |
| 11.94 | -308 | 11.94 | -396 |
| 11.95 | -308 | 11.95 | -395 |
| 11.96 | -307 | 11.96 | -395 |
| 11.97 | -306 | 11.97 | -395 |
| 11.98 | -306 | 11.98 | -395 |
| 11.98 | -305 | 11.98 | -394 |
| 11.99 | -304 | 11.99 | -394 |
| 12.00 | -304 | 12.00 | -394 |
| 12.01 | -305 | 12.01 | -394 |
| 12.02 | -305 | 12.02 | -394 |
| 12.03 | -305 | 12.03 | -394 |
| 12.03 | -304 | 12.03 | -394 |
| 12.04 | -304 | 12.04 | -394 |
| 12.05 | -305 | 12.05 | -393 |
| 12.06 | -305 | 12.06 | -393 |
| 12.07 | -305 | 12.07 | -393 |
| 12.08 | -304 | 12.08 | -392 |
| 12.08 | -304 | 12.08 | -391 |
| 12.09 | -304 | 12.09 | -390 |
| 12.10 | -305 | 12.10 | -390 |
| 12.11 | -304 | 12.11 | -389 |
| 12.12 | -304 | 12.12 | -389 |



|       |      |       |      |
|-------|------|-------|------|
| 12.13 | -305 | 12.13 | -388 |
| 12.13 | -305 | 12.13 | -389 |
| 12.14 | -304 | 12.14 | -388 |
| 12.15 | -304 | 12.15 | -388 |
| 12.16 | -304 | 12.16 | -387 |
| 12.17 | -304 | 12.17 | -386 |
| 12.18 | -303 | 12.18 | -385 |
| 12.18 | -302 | 12.18 | -385 |
| 12.19 | -302 | 12.19 | -385 |
| 12.20 | -302 | 12.20 | -384 |
| 12.21 | -302 | 12.21 | -384 |
| 12.22 | -303 | 12.22 | -384 |
| 12.23 | -303 | 12.23 | -384 |
| 12.23 | -303 | 12.23 | -383 |
| 12.24 | -302 | 12.24 | -383 |
| 12.25 | -301 | 12.25 | -383 |
| 12.26 | -300 | 12.26 | -384 |
| 12.27 | -300 | 12.27 | -385 |
| 12.28 | -299 | 12.28 | -384 |
| 12.28 | -298 | 12.28 | -383 |
| 12.29 | -298 | 12.29 | -383 |
| 12.30 | -297 | 12.30 | -383 |
| 12.31 | -297 | 12.31 | -383 |
| 12.32 | -297 | 12.32 | -383 |
| 12.33 | -296 | 12.33 | -383 |
| 12.33 | -296 | 12.33 | -383 |
| 12.34 | -295 | 12.34 | -383 |
| 12.35 | -293 | 12.35 | -383 |
| 12.36 | -292 | 12.36 | -382 |
| 12.37 | -291 | 12.37 | -382 |
| 12.38 | -291 | 12.38 | -382 |
| 12.38 | -291 | 12.38 | -382 |
| 12.39 | -290 | 12.39 | -381 |
| 12.40 | -290 | 12.40 | -380 |
| 12.41 | -289 | 12.41 | -379 |
| 12.42 | -289 | 12.42 | -379 |
| 12.43 | -289 | 12.43 | -379 |
| 12.43 | -289 | 12.43 | -380 |
| 12.44 | -288 | 12.44 | -380 |
| 12.45 | -287 | 12.45 | -380 |
| 12.46 | -287 | 12.46 | -380 |
| 12.47 | -286 | 12.47 | -380 |
| 12.48 | -285 | 12.48 | -381 |

|       |      |       |      |
|-------|------|-------|------|
| 12.48 | -284 | 12.48 | -381 |
| 12.49 | -284 | 12.49 | -381 |
| 12.50 | -283 | 12.50 | -381 |
| 12.51 | -283 | 12.51 | -381 |
| 12.52 | -282 | 12.52 | -380 |
| 12.53 | -282 | 12.53 | -379 |
| 12.53 | -282 | 12.53 | -378 |
| 12.54 | -282 | 12.54 | -377 |
| 12.55 | -282 | 12.55 | -376 |
| 12.56 | -282 | 12.56 | -375 |
| 12.57 | -282 | 12.57 | -374 |
| 12.58 | -282 | 12.58 | -373 |
| 12.58 | -282 | 12.58 | -373 |
| 12.59 | -281 | 12.59 | -373 |
| 12.60 | -280 | 12.60 | -373 |
| 12.61 | -279 | 12.61 | -373 |
| 12.62 | -278 | 12.62 | -372 |
| 12.63 | -278 | 12.63 | -372 |
| 12.63 | -278 | 12.63 | -372 |
| 12.64 | -277 | 12.64 | -372 |
| 12.65 | -278 | 12.65 | -373 |
| 12.66 | -278 | 12.66 | -373 |
| 12.67 | -277 | 12.67 | -373 |
| 12.68 | -276 | 12.68 | -374 |
| 12.68 | -276 | 12.68 | -374 |
| 12.69 | -274 | 12.69 | -373 |
| 12.70 | -273 | 12.70 | -373 |
| 12.71 | -272 | 12.71 | -373 |
| 12.72 | -272 | 12.72 | -373 |
| 12.73 | -272 | 12.73 | -372 |
| 12.73 | -272 | 12.73 | -371 |
| 12.74 | -272 | 12.74 | -371 |
| 12.75 | -273 | 12.75 | -372 |
| 12.76 | -273 | 12.76 | -372 |
| 12.77 | -273 | 12.77 | -373 |
| 12.78 | -272 | 12.78 | -373 |
| 12.78 | -272 | 12.78 | -372 |
| 12.79 | -270 | 12.79 | -372 |
| 12.80 | -270 | 12.80 | -371 |
| 12.81 | -269 | 12.81 | -371 |
| 12.82 | -268 | 12.82 | -370 |
| 12.83 | -267 | 12.83 | -370 |
| 12.83 | -266 | 12.83 | -369 |

|       |      |       |      |
|-------|------|-------|------|
| 12.84 | -265 | 12.84 | -368 |
| 12.85 | -265 | 12.85 | -368 |
| 12.86 | -265 | 12.86 | -368 |
| 12.87 | -265 | 12.87 | -369 |
| 12.88 | -264 | 12.88 | -369 |
| 12.88 | -264 | 12.88 | -369 |
| 12.89 | -263 | 12.89 | -368 |
| 12.90 | -263 | 12.90 | -368 |
| 12.91 | -263 | 12.91 | -367 |
| 12.92 | -262 | 12.92 | -367 |
| 12.93 | -262 | 12.93 | -366 |
| 12.93 | -261 | 12.93 | -365 |
| 12.94 | -260 | 12.94 | -365 |
| 12.95 | -260 | 12.95 | -364 |
| 12.96 | -259 | 12.96 | -364 |
| 12.97 | -259 | 12.97 | -364 |
| 12.98 | -258 | 12.98 | -364 |
| 12.98 | -258 | 12.98 | -363 |
| 12.99 | -258 | 12.99 | -362 |
| 13.00 | -257 | 13.00 | -361 |
| 13.01 | -256 | 13.01 | -361 |
| 13.02 | -255 | 13.02 | -361 |
| 13.03 | -253 | 13.03 | -361 |
| 13.03 | -252 | 13.03 | -361 |
| 13.04 | -251 | 13.04 | -360 |
| 13.05 | -250 | 13.05 | -359 |
| 13.06 | -250 | 13.06 | -359 |
| 13.07 | -249 | 13.07 | -358 |
| 13.08 | -248 | 13.08 | -357 |
| 13.08 | -248 | 13.08 | -357 |
| 13.09 | -248 | 13.09 | -357 |
| 13.10 | -248 | 13.10 | -356 |
| 13.11 | -247 | 13.11 | -356 |
| 13.12 | -246 | 13.12 | -356 |
| 13.13 | -245 | 13.13 | -356 |
| 13.13 | -244 | 13.13 | -357 |
| 13.14 | -243 | 13.14 | -357 |
| 13.15 | -243 | 13.15 | -357 |
| 13.16 | -244 | 13.16 | -357 |
| 13.17 | -243 | 13.17 | -356 |
| 13.18 | -243 | 13.18 | -356 |
| 13.18 | -243 | 13.18 | -356 |
| 13.19 | -242 | 13.19 | -355 |

|       |      |       |      |
|-------|------|-------|------|
| 13.20 | -241 | 13.20 | -355 |
| 13.21 | -241 | 13.21 | -354 |
| 13.22 | -241 | 13.22 | -354 |
| 13.23 | -242 | 13.23 | -354 |
| 13.23 | -242 | 13.23 | -354 |
| 13.24 | -242 | 13.24 | -354 |
| 13.25 | -242 | 13.25 | -354 |
| 13.26 | -242 | 13.26 | -354 |
| 13.27 | -243 | 13.27 | -354 |
| 13.28 | -242 | 13.28 | -354 |
| 13.28 | -242 | 13.28 | -353 |
| 13.29 | -242 | 13.29 | -352 |
| 13.30 | -241 | 13.30 | -351 |
| 13.31 | -242 | 13.31 | -350 |
| 13.32 | -242 | 13.32 | -350 |
| 13.33 | -243 | 13.33 | -350 |
| 13.33 | -243 | 13.33 | -350 |
| 13.34 | -243 | 13.34 | -350 |
| 13.35 | -243 | 13.35 | -350 |
| 13.36 | -244 | 13.36 | -350 |
| 13.37 | -244 | 13.37 | -350 |
| 13.38 | -245 | 13.38 | -350 |
| 13.38 | -246 | 13.38 | -350 |
| 13.39 | -247 | 13.39 | -350 |
| 13.40 | -248 | 13.40 | -350 |
| 13.41 | -248 | 13.41 | -350 |
| 13.42 | -249 | 13.42 | -351 |
| 13.43 | -249 | 13.43 | -350 |
| 13.43 | -249 | 13.43 | -350 |
| 13.44 | -249 | 13.44 | -350 |
| 13.45 | -249 | 13.45 | -349 |
| 13.46 | -249 | 13.46 | -348 |
| 13.47 | -249 | 13.47 | -348 |
| 13.48 | -249 | 13.48 | -347 |
| 13.48 | -250 | 13.48 | -347 |
| 13.49 | -251 | 13.49 | -346 |
| 13.50 | -251 | 13.50 | -346 |
| 13.51 | -251 | 13.51 | -346 |
| 13.52 | -250 | 13.52 | -346 |
| 13.53 | -250 | 13.53 | -346 |
| 13.53 | -249 | 13.53 | -346 |
| 13.54 | -249 | 13.54 | -345 |
| 13.55 | -248 | 13.55 | -344 |

|       |      |       |      |
|-------|------|-------|------|
| 13.56 | -248 | 13.56 | -343 |
| 13.57 | -247 | 13.57 | -343 |
| 13.58 | -247 | 13.58 | -343 |
| 13.58 | -247 | 13.58 | -344 |
| 13.59 | -247 | 13.59 | -345 |
| 13.60 | -247 | 13.60 | -345 |
| 13.61 | -247 | 13.61 | -344 |
| 13.62 | -247 | 13.62 | -344 |
| 13.63 | -247 | 13.63 | -343 |
| 13.63 | -248 | 13.63 | -342 |
| 13.64 | -248 | 13.64 | -342 |
| 13.65 | -249 | 13.65 | -341 |
| 13.66 | -249 | 13.66 | -341 |
| 13.67 | -249 | 13.67 | -340 |
| 13.68 | -248 | 13.68 | -340 |
| 13.68 | -248 | 13.68 | -338 |
| 13.69 | -247 | 13.69 | -338 |
| 13.70 | -247 | 13.70 | -337 |
| 13.71 | -247 | 13.71 | -337 |
| 13.72 | -246 | 13.72 | -337 |
| 13.73 | -246 | 13.73 | -336 |
| 13.73 | -245 | 13.73 | -336 |
| 13.74 | -244 | 13.74 | -336 |
| 13.75 | -244 | 13.75 | -335 |
| 13.76 | -244 | 13.76 | -335 |
| 13.77 | -243 | 13.77 | -335 |
| 13.78 | -243 | 13.78 | -335 |
| 13.78 | -242 | 13.78 | -335 |
| 13.79 | -242 | 13.79 | -334 |
| 13.80 | -242 | 13.80 | -334 |
| 13.81 | -241 | 13.81 | -333 |
| 13.82 | -241 | 13.82 | -333 |
| 13.83 | -241 | 13.83 | -333 |
| 13.83 | -241 | 13.83 | -333 |
| 13.84 | -241 | 13.84 | -334 |
| 13.85 | -240 | 13.85 | -333 |
| 13.86 | -240 | 13.86 | -332 |
| 13.87 | -239 | 13.87 | -332 |
| 13.88 | -239 | 13.88 | -331 |
| 13.88 | -239 | 13.88 | -330 |
| 13.89 | -239 | 13.89 | -329 |
| 13.90 | -240 | 13.90 | -329 |
| 13.91 | -240 | 13.91 | -328 |

|       |      |       |      |
|-------|------|-------|------|
| 13.92 | -241 | 13.92 | -328 |
| 13.93 | -241 | 13.93 | -327 |
| 13.93 | -241 | 13.93 | -327 |
| 13.94 | -240 | 13.94 | -327 |
| 13.95 | -241 | 13.95 | -327 |
| 13.96 | -241 | 13.96 | -327 |
| 13.97 | -241 | 13.97 | -327 |
| 13.98 | -241 | 13.98 | -328 |
| 13.98 | -241 | 13.98 | -327 |
| 13.99 | -241 | 13.99 | -327 |
| 14.00 | -242 | 14.00 | -326 |
| 14.01 | -242 | 14.01 | -325 |
| 14.02 | -243 | 14.02 | -325 |
| 14.03 | -243 | 14.03 | -325 |
| 14.03 | -243 | 14.03 | -325 |
| 14.04 | -244 | 14.04 | -324 |
| 14.05 | -243 | 14.05 | -324 |
| 14.06 | -243 | 14.06 | -324 |
| 14.07 | -244 | 14.07 | -324 |
| 14.08 | -244 | 14.08 | -324 |
| 14.08 | -243 | 14.08 | -324 |
| 14.09 | -243 | 14.09 | -324 |
| 14.10 | -243 | 14.10 | -324 |
| 14.11 | -243 | 14.11 | -324 |
| 14.12 | -242 | 14.12 | -323 |
| 14.13 | -242 | 14.13 | -322 |
| 14.13 | -241 | 14.13 | -322 |
| 14.14 | -241 | 14.14 | -321 |
| 14.15 | -242 | 14.15 | -321 |
| 14.16 | -242 | 14.16 | -322 |
| 14.17 | -242 | 14.17 | -322 |
| 14.18 | -242 | 14.18 | -322 |
| 14.18 | -241 | 14.18 | -321 |
| 14.19 | -240 | 14.19 | -321 |
| 14.20 | -239 | 14.20 | -320 |
| 14.21 | -239 | 14.21 | -320 |
| 14.22 | -238 | 14.22 | -319 |
| 14.23 | -238 | 14.23 | -319 |
| 14.23 | -238 | 14.23 | -319 |
| 14.24 | -238 | 14.24 | -318 |
| 14.25 | -238 | 14.25 | -317 |
| 14.26 | -238 | 14.26 | -316 |
| 14.27 | -238 | 14.27 | -315 |

|       |      |       |      |
|-------|------|-------|------|
| 14.28 | -238 | 14.28 | -314 |
| 14.28 | -237 | 14.28 | -313 |
| 14.29 | -237 | 14.29 | -313 |
| 14.30 | -236 | 14.30 | -314 |
| 14.31 | -236 | 14.31 | -314 |
| 14.32 | -236 | 14.32 | -313 |
| 14.33 | -236 | 14.33 | -313 |
| 14.33 | -236 | 14.33 | -313 |
| 14.34 | -235 | 14.34 | -312 |
| 14.35 | -234 | 14.35 | -312 |
| 14.36 | -233 | 14.36 | -312 |
| 14.37 | -231 | 14.37 | -312 |
| 14.38 | -230 | 14.38 | -312 |
| 14.38 | -229 | 14.38 | -312 |
| 14.39 | -228 | 14.39 | -312 |
| 14.40 | -227 | 14.40 | -312 |
| 14.41 | -226 | 14.41 | -312 |
| 14.42 | -225 | 14.42 | -312 |
| 14.43 | -225 | 14.43 | -312 |
| 14.43 | -225 | 14.43 | -312 |
| 14.44 | -225 | 14.44 | -311 |
| 14.45 | -225 | 14.45 | -310 |
| 14.46 | -225 | 14.46 | -310 |
| 14.47 | -225 | 14.47 | -310 |
| 14.48 | -224 | 14.48 | -309 |
| 14.48 | -224 | 14.48 | -309 |
| 14.49 | -223 | 14.49 | -309 |
| 14.50 | -222 | 14.50 | -309 |
| 14.51 | -221 | 14.51 | -310 |
| 14.52 | -220 | 14.52 | -310 |
| 14.53 | -219 | 14.53 | -310 |
| 14.53 | -219 | 14.53 | -310 |
| 14.54 | -220 | 14.54 | -310 |
| 14.55 | -220 | 14.55 | -309 |
| 14.56 | -220 | 14.56 | -309 |
| 14.57 | -220 | 14.57 | -308 |
| 14.58 | -219 | 14.58 | -308 |
| 14.58 | -218 | 14.58 | -307 |
| 14.59 | -217 | 14.59 | -307 |
| 14.60 | -217 | 14.60 | -307 |
| 14.61 | -217 | 14.61 | -306 |
| 14.62 | -217 | 14.62 | -306 |
| 14.63 | -216 | 14.63 | -305 |

|       |      |       |      |
|-------|------|-------|------|
| 14.63 | -216 | 14.63 | -304 |
| 14.64 | -216 | 14.64 | -304 |
| 14.65 | -216 | 14.65 | -303 |
| 14.66 | -216 | 14.66 | -303 |
| 14.67 | -216 | 14.67 | -301 |
| 14.68 | -216 | 14.68 | -300 |
| 14.68 | -216 | 14.68 | -300 |
| 14.69 | -215 | 14.69 | -299 |
| 14.70 | -215 | 14.70 | -299 |
| 14.71 | -215 | 14.71 | -299 |
| 14.72 | -214 | 14.72 | -300 |
| 14.73 | -214 | 14.73 | -299 |
| 14.73 | -213 | 14.73 | -300 |
| 14.74 | -213 | 14.74 | -300 |
| 14.75 | -212 | 14.75 | -300 |
| 14.76 | -212 | 14.76 | -300 |
| 14.77 | -212 | 14.77 | -300 |
| 14.78 | -213 | 14.78 | -300 |
| 14.78 | -213 | 14.78 | -300 |
| 14.79 | -213 | 14.79 | -300 |
| 14.80 | -212 | 14.80 | -300 |
| 14.81 | -213 | 14.81 | -300 |
| 14.82 | -213 | 14.82 | -299 |
| 14.83 | -213 | 14.83 | -299 |
| 14.83 | -212 | 14.83 | -298 |
| 14.84 | -213 | 14.84 | -298 |
| 14.85 | -213 | 14.85 | -297 |
| 14.86 | -212 | 14.86 | -297 |
| 14.87 | -211 | 14.87 | -297 |
| 14.88 | -211 | 14.88 | -296 |
| 14.88 | -210 | 14.88 | -295 |
| 14.89 | -210 | 14.89 | -295 |
| 14.90 | -210 | 14.90 | -295 |
| 14.91 | -209 | 14.91 | -294 |
| 14.92 | -209 | 14.92 | -294 |
| 14.93 | -209 | 14.93 | -294 |
| 14.93 | -209 | 14.93 | -293 |
| 14.94 | -209 | 14.94 | -292 |
| 14.95 | -209 | 14.95 | -292 |
| 14.96 | -209 | 14.96 | -293 |
| 14.97 | -208 | 14.97 | -293 |
| 14.98 | -208 | 14.98 | -293 |
| 14.98 | -207 | 14.98 | -293 |



|       |      |       |      |
|-------|------|-------|------|
| 14.99 | -206 | 14.99 | -293 |
| 15.00 | -206 | 15.00 | -294 |
| 15.01 | -206 | 15.01 | -293 |
| 15.02 | -206 | 15.02 | -292 |
| 15.03 | -206 | 15.03 | -292 |
| 15.03 | -206 | 15.03 | -292 |
| 15.04 | -205 | 15.04 | -291 |
| 15.05 | -205 | 15.05 | -290 |
| 15.06 | -204 | 15.06 | -290 |
| 15.07 | -204 | 15.07 | -290 |
| 15.08 | -203 | 15.08 | -290 |
| 15.08 | -203 | 15.08 | -290 |
| 15.09 | -202 | 15.09 | -289 |
| 15.10 | -202 | 15.10 | -289 |
| 15.11 | -202 | 15.11 | -289 |
| 15.12 | -203 | 15.12 | -288 |
| 15.13 | -203 | 15.13 | -289 |
| 15.13 | -203 | 15.13 | -289 |
| 15.14 | -202 | 15.14 | -289 |
| 15.15 | -202 | 15.15 | -289 |
| 15.16 | -202 | 15.16 | -290 |
| 15.17 | -202 | 15.17 | -289 |
| 15.18 | -201 | 15.18 | -289 |
| 15.18 | -201 | 15.18 | -288 |
| 15.19 | -201 | 15.19 | -287 |
| 15.20 | -201 | 15.20 | -286 |
| 15.21 | -200 | 15.21 | -285 |
| 15.22 | -200 | 15.22 | -285 |
| 15.23 | -199 | 15.23 | -285 |
| 15.23 | -199 | 15.23 | -285 |
| 15.24 | -198 | 15.24 | -285 |
| 15.25 | -198 | 15.25 | -285 |
| 15.26 | -198 | 15.26 | -285 |
| 15.27 | -198 | 15.27 | -285 |
| 15.28 | -198 | 15.28 | -284 |
| 15.28 | -198 | 15.28 | -283 |
| 15.29 | -199 | 15.29 | -283 |
| 15.30 | -199 | 15.30 | -283 |
| 15.31 | -200 | 15.31 | -283 |
| 15.32 | -200 | 15.32 | -283 |
| 15.33 | -199 | 15.33 | -283 |
| 15.33 | -199 | 15.33 | -282 |
| 15.34 | -200 | 15.34 | -281 |

|       |      |       |      |
|-------|------|-------|------|
| 15.35 | -200 | 15.35 | -280 |
| 15.36 | -200 | 15.36 | -279 |
| 15.37 | -200 | 15.37 | -279 |
| 15.38 | -200 | 15.38 | -278 |
| 15.38 | -200 | 15.38 | -277 |
| 15.39 | -200 | 15.39 | -277 |
| 15.40 | -199 | 15.40 | -277 |
| 15.41 | -199 | 15.41 | -277 |
| 15.42 | -198 | 15.42 | -277 |
| 15.43 | -198 | 15.43 | -277 |
| 15.43 | -198 | 15.43 | -277 |
| 15.44 | -199 | 15.44 | -277 |
| 15.45 | -199 | 15.45 | -276 |
| 15.46 | -200 | 15.46 | -276 |
| 15.47 | -200 | 15.47 | -276 |
| 15.48 | -199 | 15.48 | -276 |
| 15.48 | -200 | 15.48 | -275 |
| 15.49 | -200 | 15.49 | -275 |
| 15.50 | -199 | 15.50 | -275 |
| 15.51 | -199 | 15.51 | -275 |
| 15.52 | -199 | 15.52 | -275 |
| 15.53 | -198 | 15.53 | -275 |
| 15.53 | -198 | 15.53 | -275 |
| 15.54 | -198 | 15.54 | -275 |
| 15.55 | -198 | 15.55 | -275 |
| 15.56 | -197 | 15.56 | -274 |
| 15.57 | -197 | 15.57 | -274 |
| 15.58 | -197 | 15.58 | -274 |
| 15.58 | -197 | 15.58 | -273 |
| 15.59 | -197 | 15.59 | -273 |
| 15.60 | -198 | 15.60 | -272 |
| 15.61 | -198 | 15.61 | -272 |
| 15.62 | -198 | 15.62 | -271 |
| 15.63 | -198 | 15.63 | -271 |
| 15.63 | -197 | 15.63 | -271 |
| 15.64 | -196 | 15.64 | -270 |
| 15.65 | -195 | 15.65 | -269 |
| 15.66 | -195 | 15.66 | -268 |
| 15.67 | -195 | 15.67 | -268 |
| 15.68 | -195 | 15.68 | -267 |
| 15.68 | -194 | 15.68 | -267 |
| 15.69 | -194 | 15.69 | -266 |
| 15.70 | -193 | 15.70 | -266 |

|       |      |       |      |
|-------|------|-------|------|
| 15.71 | -193 | 15.71 | -265 |
| 15.72 | -192 | 15.72 | -265 |
| 15.73 | -191 | 15.73 | -265 |
| 15.73 | -191 | 15.73 | -264 |
| 15.74 | -190 | 15.74 | -264 |
| 15.75 | -189 | 15.75 | -264 |
| 15.76 | -189 | 15.76 | -264 |
| 15.77 | -189 | 15.77 | -264 |
| 15.78 | -189 | 15.78 | -264 |
| 15.78 | -189 | 15.78 | -265 |
| 15.79 | -189 | 15.79 | -264 |
| 15.80 | -189 | 15.80 | -264 |
| 15.81 | -189 | 15.81 | -263 |
| 15.82 | -188 | 15.82 | -262 |
| 15.83 | -188 | 15.83 | -261 |
| 15.83 | -188 | 15.83 | -261 |
| 15.84 | -188 | 15.84 | -260 |
| 15.85 | -187 | 15.85 | -260 |
| 15.86 | -187 | 15.86 | -260 |
| 15.87 | -187 | 15.87 | -260 |
| 15.88 | -186 | 15.88 | -259 |
| 15.88 | -186 | 15.88 | -259 |
| 15.89 | -185 | 15.89 | -259 |
| 15.90 | -185 | 15.90 | -259 |
| 15.91 | -185 | 15.91 | -259 |
| 15.92 | -185 | 15.92 | -258 |
| 15.93 | -185 | 15.93 | -258 |
| 15.93 | -185 | 15.93 | -258 |
| 15.94 | -185 | 15.94 | -257 |
| 15.95 | -184 | 15.95 | -257 |
| 15.96 | -183 | 15.96 | -257 |
| 15.97 | -183 | 15.97 | -257 |
| 15.98 | -183 | 15.98 | -256 |
| 15.98 | -183 | 15.98 | -256 |
| 15.99 | -183 | 15.99 | -255 |
| 16.00 | -183 | 16.00 | -255 |
| 16.01 | -183 | 16.01 | -255 |
| 16.02 | -183 | 16.02 | -256 |
| 16.03 | -183 | 16.03 | -256 |
| 16.03 | -183 | 16.03 | -257 |
| 16.04 | -183 | 16.04 | -257 |
| 16.05 | -183 | 16.05 | -258 |
| 16.06 | -183 | 16.06 | -258 |

|       |      |       |      |
|-------|------|-------|------|
| 16.07 | -183 | 16.07 | -258 |
| 16.08 | -183 | 16.08 | -258 |
| 16.08 | -183 | 16.08 | -257 |
| 16.09 | -182 | 16.09 | -256 |
| 16.10 | -182 | 16.10 | -255 |
| 16.11 | -182 | 16.11 | -255 |
| 16.12 | -182 | 16.12 | -255 |
| 16.13 | -182 | 16.13 | -255 |
| 16.13 | -182 | 16.13 | -254 |
| 16.14 | -181 | 16.14 | -254 |
| 16.15 | -181 | 16.15 | -254 |
| 16.16 | -181 | 16.16 | -253 |
| 16.17 | -181 | 16.17 | -253 |
| 16.18 | -181 | 16.18 | -252 |
| 16.18 | -182 | 16.18 | -252 |
| 16.19 | -181 | 16.19 | -251 |
| 16.20 | -180 | 16.20 | -251 |
| 16.21 | -179 | 16.21 | -251 |
| 16.22 | -179 | 16.22 | -250 |
| 16.23 | -178 | 16.23 | -250 |
| 16.23 | -177 | 16.23 | -250 |
| 16.24 | -176 | 16.24 | -250 |
| 16.25 | -175 | 16.25 | -250 |
| 16.26 | -175 | 16.26 | -249 |
| 16.27 | -175 | 16.27 | -248 |
| 16.28 | -175 | 16.28 | -248 |
| 16.28 | -175 | 16.28 | -247 |
| 16.29 | -175 | 16.29 | -247 |
| 16.30 | -175 | 16.30 | -247 |
| 16.31 | -174 | 16.31 | -247 |
| 16.32 | -175 | 16.32 | -247 |
| 16.33 | -175 | 16.33 | -248 |
| 16.33 | -174 | 16.33 | -248 |
| 16.34 | -173 | 16.34 | -248 |
| 16.35 | -173 | 16.35 | -247 |
| 16.36 | -173 | 16.36 | -247 |
| 16.37 | -172 | 16.37 | -247 |
| 16.38 | -171 | 16.38 | -247 |
| 16.38 | -170 | 16.38 | -247 |
| 16.39 | -171 | 16.39 | -246 |
| 16.40 | -170 | 16.40 | -245 |
| 16.41 | -170 | 16.41 | -245 |
| 16.42 | -170 | 16.42 | -245 |

|       |      |       |      |
|-------|------|-------|------|
| 16.43 | -170 | 16.43 | -245 |
| 16.43 | -170 | 16.43 | -244 |
| 16.44 | -169 | 16.44 | -243 |
| 16.45 | -169 | 16.45 | -241 |
| 16.46 | -168 | 16.46 | -241 |
| 16.47 | -168 | 16.47 | -240 |
| 16.48 | -167 | 16.48 | -239 |
| 16.48 | -167 | 16.48 | -239 |
| 16.49 | -167 | 16.49 | -239 |
| 16.50 | -167 | 16.50 | -240 |
| 16.51 | -167 | 16.51 | -240 |
| 16.52 | -166 | 16.52 | -240 |
| 16.53 | -166 | 16.53 | -240 |
| 16.53 | -165 | 16.53 | -240 |
| 16.54 | -166 | 16.54 | -240 |
| 16.55 | -166 | 16.55 | -239 |
| 16.56 | -166 | 16.56 | -239 |
| 16.57 | -166 | 16.57 | -239 |
| 16.58 | -166 | 16.58 | -239 |
| 16.58 | -166 | 16.58 | -239 |
| 16.59 | -166 | 16.59 | -239 |
| 16.60 | -165 | 16.60 | -239 |
| 16.61 | -164 | 16.61 | -239 |
| 16.62 | -164 | 16.62 | -238 |
| 16.63 | -164 | 16.63 | -238 |
| 16.63 | -163 | 16.63 | -237 |
| 16.64 | -163 | 16.64 | -237 |
| 16.65 | -162 | 16.65 | -236 |
| 16.66 | -162 | 16.66 | -236 |
| 16.67 | -162 | 16.67 | -235 |
| 16.68 | -162 | 16.68 | -235 |
| 16.68 | -162 | 16.68 | -235 |
| 16.69 | -163 | 16.69 | -234 |
| 16.70 | -163 | 16.70 | -234 |
| 16.71 | -163 | 16.71 | -234 |
| 16.72 | -163 | 16.72 | -234 |
| 16.73 | -162 | 16.73 | -234 |
| 16.73 | -162 | 16.73 | -234 |
| 16.74 | -162 | 16.74 | -234 |
| 16.75 | -162 | 16.75 | -234 |
| 16.76 | -163 | 16.76 | -234 |
| 16.77 | -163 | 16.77 | -233 |
| 16.78 | -162 | 16.78 | -233 |

|       |      |       |      |
|-------|------|-------|------|
| 16.78 | -161 | 16.78 | -232 |
| 16.79 | -160 | 16.79 | -232 |
| 16.80 | -159 | 16.80 | -232 |
| 16.81 | -158 | 16.81 | -231 |
| 16.82 | -156 | 16.82 | -231 |
| 16.83 | -156 | 16.83 | -231 |
| 16.83 | -156 | 16.83 | -232 |
| 16.84 | -155 | 16.84 | -232 |
| 16.85 | -155 | 16.85 | -232 |
| 16.86 | -155 | 16.86 | -232 |
| 16.87 | -155 | 16.87 | -232 |
| 16.88 | -155 | 16.88 | -232 |
| 16.88 | -155 | 16.88 | -232 |
| 16.89 | -155 | 16.89 | -233 |
| 16.90 | -155 | 16.90 | -232 |
| 16.91 | -154 | 16.91 | -233 |
| 16.92 | -154 | 16.92 | -233 |
| 16.93 | -154 | 16.93 | -233 |
| 16.93 | -154 | 16.93 | -233 |
| 16.94 | -154 | 16.94 | -232 |
| 16.95 | -153 | 16.95 | -232 |
| 16.96 | -153 | 16.96 | -231 |
| 16.97 | -153 | 16.97 | -230 |
| 16.98 | -153 | 16.98 | -229 |
| 16.98 | -153 | 16.98 | -228 |
| 16.99 | -153 | 16.99 | -227 |
| 17.00 | -153 | 17.00 | -227 |
| 17.01 | -152 | 17.01 | -227 |
| 17.02 | -152 | 17.02 | -227 |
| 17.03 | -151 | 17.03 | -227 |
| 17.03 | -151 | 17.03 | -227 |
| 17.04 | -151 | 17.04 | -227 |
| 17.05 | -151 | 17.05 | -226 |
| 17.06 | -151 | 17.06 | -226 |
| 17.07 | -151 | 17.07 | -225 |
| 17.08 | -150 | 17.08 | -225 |
| 17.08 | -151 | 17.08 | -224 |
| 17.09 | -150 | 17.09 | -224 |
| 17.10 | -150 | 17.10 | -224 |
| 17.11 | -150 | 17.11 | -223 |
| 17.12 | -148 | 17.12 | -223 |
| 17.13 | -147 | 17.13 | -222 |
| 17.13 | -146 | 17.13 | -222 |

|       |      |       |      |
|-------|------|-------|------|
| 17.14 | -146 | 17.14 | -222 |
| 17.15 | -146 | 17.15 | -222 |
| 17.16 | -146 | 17.16 | -222 |
| 17.17 | -146 | 17.17 | -222 |
| 17.18 | -146 | 17.18 | -221 |
| 17.18 | -146 | 17.18 | -221 |
| 17.19 | -146 | 17.19 | -220 |
| 17.20 | -146 | 17.20 | -220 |
| 17.21 | -146 | 17.21 | -220 |
| 17.22 | -146 | 17.22 | -220 |
| 17.23 | -145 | 17.23 | -219 |
| 17.23 | -146 | 17.23 | -220 |
| 17.24 | -146 | 17.24 | -219 |
| 17.25 | -145 | 17.25 | -219 |
| 17.26 | -145 | 17.26 | -218 |
| 17.27 | -145 | 17.27 | -218 |
| 17.28 | -145 | 17.28 | -217 |
| 17.28 | -144 | 17.28 | -217 |
| 17.29 | -144 | 17.29 | -217 |
| 17.30 | -143 | 17.30 | -218 |
| 17.31 | -143 | 17.31 | -218 |
| 17.32 | -143 | 17.32 | -218 |
| 17.33 | -142 | 17.33 | -218 |
| 17.33 | -142 | 17.33 | -218 |
| 17.34 | -142 | 17.34 | -218 |
| 17.35 | -143 | 17.35 | -218 |
| 17.36 | -143 | 17.36 | -218 |
| 17.37 | -143 | 17.37 | -218 |
| 17.38 | -143 | 17.38 | -218 |
| 17.38 | -142 | 17.38 | -218 |
| 17.39 | -142 | 17.39 | -217 |
| 17.40 | -142 | 17.40 | -217 |
| 17.41 | -142 | 17.41 | -216 |
| 17.42 | -141 | 17.42 | -215 |
| 17.43 | -140 | 17.43 | -215 |
| 17.43 | -140 | 17.43 | -214 |
| 17.44 | -139 | 17.44 | -214 |
| 17.45 | -139 | 17.45 | -213 |
| 17.46 | -139 | 17.46 | -212 |
| 17.47 | -138 | 17.47 | -212 |
| 17.48 | -138 | 17.48 | -212 |
| 17.48 | -138 | 17.48 | -212 |
| 17.49 | -137 | 17.49 | -212 |

|       |      |       |      |
|-------|------|-------|------|
| 17.50 | -136 | 17.50 | -211 |
| 17.51 | -136 | 17.51 | -211 |
| 17.52 | -135 | 17.52 | -211 |
| 17.53 | -135 | 17.53 | -210 |
| 17.53 | -135 | 17.53 | -209 |
| 17.54 | -136 | 17.54 | -209 |
| 17.55 | -137 | 17.55 | -208 |
| 17.56 | -137 | 17.56 | -208 |
| 17.57 | -137 | 17.57 | -208 |
| 17.58 | -136 | 17.58 | -208 |
| 17.58 | -136 | 17.58 | -208 |
| 17.59 | -135 | 17.59 | -208 |
| 17.60 | -135 | 17.60 | -208 |
| 17.61 | -134 | 17.61 | -207 |
| 17.62 | -133 | 17.62 | -207 |
| 17.63 | -132 | 17.63 | -207 |
| 17.63 | -132 | 17.63 | -207 |
| 17.64 | -131 | 17.64 | -207 |
| 17.65 | -130 | 17.65 | -208 |
| 17.66 | -130 | 17.66 | -208 |
| 17.67 | -131 | 17.67 | -207 |
| 17.68 | -130 | 17.68 | -207 |
| 17.68 | -129 | 17.68 | -207 |
| 17.69 | -129 | 17.69 | -206 |
| 17.70 | -129 | 17.70 | -206 |
| 17.71 | -128 | 17.71 | -205 |
| 17.72 | -128 | 17.72 | -205 |
| 17.73 | -128 | 17.73 | -204 |
| 17.73 | -128 | 17.73 | -204 |
| 17.74 | -128 | 17.74 | -203 |
| 17.75 | -128 | 17.75 | -203 |
| 17.76 | -129 | 17.76 | -203 |
| 17.77 | -129 | 17.77 | -203 |
| 17.78 | -129 | 17.78 | -203 |
| 17.78 | -129 | 17.78 | -202 |
| 17.79 | -128 | 17.79 | -202 |
| 17.80 | -128 | 17.80 | -202 |
| 17.81 | -127 | 17.81 | -201 |
| 17.82 | -127 | 17.82 | -201 |
| 17.83 | -126 | 17.83 | -201 |
| 17.83 | -126 | 17.83 | -200 |
| 17.84 | -125 | 17.84 | -200 |
| 17.85 | -124 | 17.85 | -200 |



|       |      |       |      |
|-------|------|-------|------|
| 17.86 | -124 | 17.86 | -199 |
| 17.87 | -123 | 17.87 | -198 |
| 17.88 | -123 | 17.88 | -197 |
| 17.88 | -123 | 17.88 | -197 |
| 17.89 | -124 | 17.89 | -196 |
| 17.90 | -124 | 17.90 | -196 |
| 17.91 | -124 | 17.91 | -195 |
| 17.92 | -123 | 17.92 | -194 |
| 17.93 | -123 | 17.93 | -193 |
| 17.93 | -123 | 17.93 | -193 |
| 17.94 | -123 | 17.94 | -192 |
| 17.95 | -123 | 17.95 | -191 |
| 17.96 | -122 | 17.96 | -191 |
| 17.97 | -122 | 17.97 | -191 |
| 17.98 | -122 | 17.98 | -190 |
| 17.98 | -121 | 17.98 | -190 |
| 17.99 | -121 | 17.99 | -190 |
| 18.00 | -120 | 18.00 | -189 |
| 18.01 | -120 | 18.01 | -189 |
| 18.02 | -119 | 18.02 | -188 |
| 18.03 | -119 | 18.03 | -188 |
| 18.03 | -119 | 18.03 | -188 |
| 18.04 | -120 | 18.04 | -188 |
| 18.05 | -120 | 18.05 | -188 |
| 18.06 | -120 | 18.06 | -189 |
| 18.07 | -119 | 18.07 | -190 |
| 18.08 | -118 | 18.08 | -189 |
| 18.08 | -118 | 18.08 | -188 |
| 18.09 | -117 | 18.09 | -188 |
| 18.10 | -117 | 18.10 | -188 |
| 18.11 | -116 | 18.11 | -187 |
| 18.12 | -116 | 18.12 | -187 |
| 18.13 | -116 | 18.13 | -187 |
| 18.13 | -116 | 18.13 | -187 |
| 18.14 | -116 | 18.14 | -187 |
| 18.15 | -116 | 18.15 | -186 |
| 18.16 | -116 | 18.16 | -185 |
| 18.17 | -116 | 18.17 | -185 |
| 18.18 | -116 | 18.18 | -185 |
| 18.18 | -116 | 18.18 | -185 |
| 18.19 | -115 | 18.19 | -185 |
| 18.20 | -115 | 18.20 | -184 |
| 18.21 | -114 | 18.21 | -183 |

|       |      |       |      |
|-------|------|-------|------|
| 18.22 | -114 | 18.22 | -182 |
| 18.23 | -114 | 18.23 | -181 |
| 18.23 | -113 | 18.23 | -181 |
| 18.24 | -113 | 18.24 | -181 |
| 18.25 | -112 | 18.25 | -181 |
| 18.26 | -111 | 18.26 | -181 |
| 18.27 | -110 | 18.27 | -181 |
| 18.28 | -110 | 18.28 | -182 |
| 18.28 | -110 | 18.28 | -181 |
| 18.29 | -111 | 18.29 | -181 |
| 18.30 | -111 | 18.30 | -181 |
| 18.31 | -111 | 18.31 | -180 |
| 18.32 | -111 | 18.32 | -180 |
| 18.33 | -110 | 18.33 | -180 |
| 18.33 | -109 | 18.33 | -179 |
| 18.34 | -109 | 18.34 | -179 |
| 18.35 | -109 | 18.35 | -178 |
| 18.36 | -109 | 18.36 | -177 |
| 18.37 | -109 | 18.37 | -176 |
| 18.38 | -108 | 18.38 | -175 |
| 18.38 | -107 | 18.38 | -175 |
| 18.39 | -106 | 18.39 | -174 |
| 18.40 | -106 | 18.40 | -174 |
| 18.41 | -105 | 18.41 | -174 |
| 18.42 | -105 | 18.42 | -174 |
| 18.43 | -104 | 18.43 | -174 |
| 18.43 | -104 | 18.43 | -173 |
| 18.44 | -104 | 18.44 | -173 |
| 18.45 | -104 | 18.45 | -174 |
| 18.46 | -104 | 18.46 | -174 |
| 18.47 | -104 | 18.47 | -174 |
| 18.48 | -104 | 18.48 | -173 |
| 18.48 | -104 | 18.48 | -173 |
| 18.49 | -104 | 18.49 | -172 |
| 18.50 | -104 | 18.50 | -172 |
| 18.51 | -105 | 18.51 | -171 |
| 18.52 | -105 | 18.52 | -171 |
| 18.53 | -105 | 18.53 | -171 |
| 18.53 | -105 | 18.53 | -171 |
| 18.54 | -104 | 18.54 | -171 |
| 18.55 | -104 | 18.55 | -170 |
| 18.56 | -103 | 18.56 | -170 |
| 18.57 | -104 | 18.57 | -170 |

|       |      |       |      |
|-------|------|-------|------|
| 18.58 | -104 | 18.58 | -170 |
| 18.58 | -104 | 18.58 | -170 |
| 18.59 | -103 | 18.59 | -170 |
| 18.60 | -103 | 18.60 | -170 |
| 18.61 | -102 | 18.61 | -170 |
| 18.62 | -103 | 18.62 | -169 |
| 18.63 | -103 | 18.63 | -169 |
| 18.63 | -103 | 18.63 | -169 |
| 18.64 | -103 | 18.64 | -168 |
| 18.65 | -103 | 18.65 | -168 |
| 18.66 | -103 | 18.66 | -168 |
| 18.67 | -102 | 18.67 | -167 |
| 18.68 | -101 | 18.68 | -166 |
| 18.68 | -100 | 18.68 | -166 |
| 18.69 | -99  | 18.69 | -166 |
| 18.70 | -98  | 18.70 | -165 |
| 18.71 | -98  | 18.71 | -165 |
| 18.72 | -98  | 18.72 | -165 |
| 18.73 | -99  | 18.73 | -165 |
| 18.73 | -99  | 18.73 | -164 |
| 18.74 | -99  | 18.74 | -164 |
| 18.75 | -99  | 18.75 | -164 |
| 18.76 | -98  | 18.76 | -163 |
| 18.77 | -97  | 18.77 | -162 |
| 18.78 | -96  | 18.78 | -162 |
| 18.78 | -95  | 18.78 | -161 |
| 18.79 | -95  | 18.79 | -161 |
| 18.80 | -94  | 18.80 | -161 |
| 18.81 | -94  | 18.81 | -161 |
| 18.82 | -94  | 18.82 | -160 |
| 18.83 | -94  | 18.83 | -160 |
| 18.83 | -94  | 18.83 | -161 |
| 18.84 | -94  | 18.84 | -160 |
| 18.85 | -94  | 18.85 | -160 |
| 18.86 | -94  | 18.86 | -159 |
| 18.87 | -95  | 18.87 | -159 |
| 18.88 | -94  | 18.88 | -159 |
| 18.88 | -94  | 18.88 | -159 |
| 18.89 | -93  | 18.89 | -159 |
| 18.90 | -92  | 18.90 | -158 |
| 18.91 | -92  | 18.91 | -158 |
| 18.92 | -92  | 18.92 | -157 |
| 18.93 | -92  | 18.93 | -157 |

|       |     |       |      |
|-------|-----|-------|------|
| 18.93 | -92 | 18.93 | -157 |
| 18.94 | -92 | 18.94 | -157 |
| 18.95 | -91 | 18.95 | -157 |
| 18.96 | -91 | 18.96 | -157 |
| 18.97 | -90 | 18.97 | -156 |
| 18.98 | -90 | 18.98 | -155 |
| 18.98 | -90 | 18.98 | -155 |
| 18.99 | -90 | 18.99 | -154 |
| 19.00 | -89 | 19.00 | -153 |
| 19.01 | -88 | 19.01 | -153 |
| 19.02 | -88 | 19.02 | -153 |
| 19.03 | -88 | 19.03 | -153 |
| 19.03 | -87 | 19.03 | -153 |
| 19.04 | -86 | 19.04 | -153 |
| 19.05 | -85 | 19.05 | -154 |
| 19.06 | -85 | 19.06 | -154 |
| 19.07 | -85 | 19.07 | -154 |
| 19.08 | -85 | 19.08 | -154 |
| 19.08 | -85 | 19.08 | -154 |
| 19.09 | -85 | 19.09 | -153 |
| 19.10 | -85 | 19.10 | -153 |
| 19.11 | -85 | 19.11 | -152 |
| 19.12 | -85 | 19.12 | -151 |
| 19.13 | -85 | 19.13 | -151 |
| 19.13 | -85 | 19.13 | -151 |
| 19.14 | -84 | 19.14 | -151 |
| 19.15 | -84 | 19.15 | -151 |
| 19.16 | -84 | 19.16 | -151 |
| 19.17 | -83 | 19.17 | -151 |
| 19.18 | -83 | 19.18 | -150 |
| 19.18 | -83 | 19.18 | -150 |
| 19.19 | -83 | 19.19 | -149 |
| 19.20 | -82 | 19.20 | -148 |
| 19.21 | -82 | 19.21 | -148 |
| 19.22 | -81 | 19.22 | -147 |
| 19.23 | -80 | 19.23 | -147 |
| 19.23 | -79 | 19.23 | -146 |
| 19.24 | -78 | 19.24 | -146 |
| 19.25 | -78 | 19.25 | -145 |
| 19.26 | -78 | 19.26 | -144 |
| 19.27 | -78 | 19.27 | -144 |
| 19.28 | -77 | 19.28 | -144 |
| 19.28 | -77 | 19.28 | -144 |

|       |     |       |      |
|-------|-----|-------|------|
| 19.29 | -77 | 19.29 | -144 |
| 19.30 | -77 | 19.30 | -144 |
| 19.31 | -77 | 19.31 | -144 |
| 19.32 | -78 | 19.32 | -145 |
| 19.33 | -79 | 19.33 | -144 |
| 19.33 | -78 | 19.33 | -144 |
| 19.34 | -78 | 19.34 | -143 |
| 19.35 | -78 | 19.35 | -143 |
| 19.36 | -77 | 19.36 | -143 |
| 19.37 | -77 | 19.37 | -142 |
| 19.38 | -77 | 19.38 | -142 |
| 19.38 | -76 | 19.38 | -142 |
| 19.39 | -76 | 19.39 | -141 |
| 19.40 | -75 | 19.40 | -141 |
| 19.41 | -74 | 19.41 | -141 |
| 19.42 | -73 | 19.42 | -141 |
| 19.43 | -72 | 19.43 | -141 |
| 19.43 | -72 | 19.43 | -141 |
| 19.44 | -72 | 19.44 | -141 |
| 19.45 | -72 | 19.45 | -141 |
| 19.46 | -71 | 19.46 | -141 |
| 19.47 | -71 | 19.47 | -141 |
| 19.48 | -71 | 19.48 | -141 |
| 19.48 | -71 | 19.48 | -141 |
| 19.49 | -72 | 19.49 | -141 |
| 19.50 | -72 | 19.50 | -141 |
| 19.51 | -73 | 19.51 | -140 |
| 19.52 | -73 | 19.52 | -139 |
| 19.53 | -72 | 19.53 | -138 |
| 19.53 | -71 | 19.53 | -138 |
| 19.54 | -71 | 19.54 | -138 |
| 19.55 | -70 | 19.55 | -137 |
| 19.56 | -70 | 19.56 | -136 |
| 19.57 | -70 | 19.57 | -135 |
| 19.58 | -70 | 19.58 | -134 |
| 19.58 | -71 | 19.58 | -133 |
| 19.59 | -71 | 19.59 | -133 |
| 19.60 | -71 | 19.60 | -134 |
| 19.61 | -70 | 19.61 | -133 |
| 19.62 | -70 | 19.62 | -133 |
| 19.63 | -69 | 19.63 | -133 |
| 19.63 | -69 | 19.63 | -132 |
| 19.64 | -69 | 19.64 | -132 |

|       |     |       |      |
|-------|-----|-------|------|
| 19.65 | -69 | 19.65 | -131 |
| 19.66 | -68 | 19.66 | -131 |
| 19.67 | -68 | 19.67 | -130 |
| 19.68 | -67 | 19.68 | -130 |
| 19.68 | -67 | 19.68 | -130 |
| 19.69 | -67 | 19.69 | -131 |
| 19.70 | -67 | 19.70 | -131 |
| 19.71 | -67 | 19.71 | -130 |
| 19.72 | -67 | 19.72 | -130 |
| 19.73 | -67 | 19.73 | -129 |
| 19.73 | -67 | 19.73 | -129 |
| 19.74 | -67 | 19.74 | -128 |
| 19.75 | -66 | 19.75 | -128 |
| 19.76 | -66 | 19.76 | -127 |
| 19.77 | -65 | 19.77 | -127 |
| 19.78 | -65 | 19.78 | -127 |
| 19.78 | -65 | 19.78 | -127 |
| 19.79 | -64 | 19.79 | -127 |
| 19.80 | -64 | 19.80 | -127 |
| 19.81 | -64 | 19.81 | -127 |
| 19.82 | -64 | 19.82 | -126 |
| 19.83 | -64 | 19.83 | -126 |
| 19.83 | -64 | 19.83 | -125 |
| 19.84 | -63 | 19.84 | -125 |
| 19.85 | -63 | 19.85 | -125 |
| 19.86 | -63 | 19.86 | -125 |
| 19.87 | -64 | 19.87 | -125 |
| 19.88 | -64 | 19.88 | -125 |
| 19.88 | -64 | 19.88 | -125 |
| 19.89 | -64 | 19.89 | -125 |
| 19.90 | -63 | 19.90 | -124 |
| 19.91 | -63 | 19.91 | -124 |
| 19.92 | -63 | 19.92 | -123 |
| 19.93 | -63 | 19.93 | -123 |
| 19.93 | -64 | 19.93 | -123 |
| 19.94 | -64 | 19.94 | -123 |
| 19.95 | -64 | 19.95 | -123 |
| 19.96 | -63 | 19.96 | -122 |
| 19.97 | -63 | 19.97 | -122 |
| 19.98 | -62 | 19.98 | -122 |
| 19.98 | -62 | 19.98 | -122 |
| 19.99 | -62 | 19.99 | -121 |
| 20.00 | -62 | 20.00 | -121 |

|       |     |       |      |
|-------|-----|-------|------|
| 20.01 | -61 | 20.01 | -121 |
| 20.02 | -61 | 20.02 | -120 |
| 20.03 | -61 | 20.03 | -119 |
| 20.03 | -61 | 20.03 | -119 |
| 20.04 | -60 | 20.04 | -118 |
| 20.05 | -59 | 20.05 | -118 |
| 20.06 | -59 | 20.06 | -118 |
| 20.07 | -59 | 20.07 | -117 |
| 20.08 | -59 | 20.08 | -117 |
| 20.08 | -59 | 20.08 | -116 |
| 20.09 | -59 | 20.09 | -116 |
| 20.10 | -58 | 20.10 | -116 |
| 20.11 | -57 | 20.11 | -115 |
| 20.12 | -56 | 20.12 | -116 |
| 20.13 | -56 | 20.13 | -116 |
| 20.13 | -55 | 20.13 | -116 |
| 20.14 | -54 | 20.14 | -116 |
| 20.15 | -53 | 20.15 | -116 |
| 20.16 | -52 | 20.16 | -117 |
| 20.17 | -52 | 20.17 | -116 |
| 20.18 | -52 | 20.18 | -116 |
| 20.18 | -52 | 20.18 | -114 |
| 20.19 | -52 | 20.19 | -113 |
| 20.20 | -51 | 20.20 | -112 |
| 20.21 | -52 | 20.21 | -112 |
| 20.22 | -52 | 20.22 | -111 |
| 20.23 | -52 | 20.23 | -111 |
| 20.23 | -52 | 20.23 | -111 |
| 20.24 | -53 | 20.24 | -111 |
| 20.25 | -53 | 20.25 | -111 |
| 20.26 | -53 | 20.26 | -110 |
| 20.27 | -52 | 20.27 | -109 |
| 20.28 | -52 | 20.28 | -108 |
| 20.28 | -51 | 20.28 | -108 |
| 20.29 | -51 | 20.29 | -109 |
| 20.30 | -50 | 20.30 | -109 |
| 20.31 | -49 | 20.31 | -109 |
| 20.32 | -48 | 20.32 | -109 |
| 20.33 | -47 | 20.33 | -108 |
| 20.33 | -47 | 20.33 | -108 |
| 20.34 | -47 | 20.34 | -107 |
| 20.35 | -47 | 20.35 | -106 |
| 20.36 | -47 | 20.36 | -105 |

|       |     |       |      |
|-------|-----|-------|------|
| 20.37 | -47 | 20.37 | -105 |
| 20.38 | -47 | 20.38 | -104 |
| 20.38 | -46 | 20.38 | -104 |
| 20.39 | -46 | 20.39 | -104 |
| 20.40 | -46 | 20.40 | -103 |
| 20.41 | -46 | 20.41 | -103 |
| 20.42 | -45 | 20.42 | -103 |
| 20.43 | -44 | 20.43 | -103 |
| 20.43 | -44 | 20.43 | -102 |
| 20.44 | -43 | 20.44 | -101 |
| 20.45 | -43 | 20.45 | -101 |
| 20.46 | -43 | 20.46 | -101 |
| 20.47 | -43 | 20.47 | -101 |
| 20.48 | -43 | 20.48 | -102 |
| 20.48 | -42 | 20.48 | -102 |
| 20.49 | -42 | 20.49 | -101 |
| 20.50 | -41 | 20.50 | -101 |
| 20.51 | -41 | 20.51 | -100 |
| 20.52 | -40 | 20.52 | -99  |
| 20.53 | -41 | 20.53 | -99  |
| 20.53 | -40 | 20.53 | -99  |
| 20.54 | -40 | 20.54 | -99  |
| 20.55 | -40 | 20.55 | -99  |
| 20.56 | -40 | 20.56 | -98  |
| 20.57 | -40 | 20.57 | -97  |
| 20.58 | -39 | 20.58 | -97  |
| 20.58 | -39 | 20.58 | -97  |
| 20.59 | -38 | 20.59 | -97  |
| 20.60 | -38 | 20.60 | -96  |
| 20.61 | -37 | 20.61 | -96  |
| 20.62 | -36 | 20.62 | -95  |
| 20.63 | -35 | 20.63 | -95  |
| 20.63 | -35 | 20.63 | -95  |
| 20.64 | -34 | 20.64 | -96  |
| 20.65 | -34 | 20.65 | -96  |
| 20.66 | -33 | 20.66 | -95  |
| 20.67 | -33 | 20.67 | -94  |
| 20.68 | -33 | 20.68 | -94  |
| 20.68 | -32 | 20.68 | -93  |
| 20.69 | -32 | 20.69 | -94  |
| 20.70 | -31 | 20.70 | -94  |
| 20.71 | -30 | 20.71 | -93  |
| 20.72 | -29 | 20.72 | -92  |



|       |     |       |     |
|-------|-----|-------|-----|
| 20.73 | -28 | 20.73 | -91 |
| 20.73 | -28 | 20.73 | -91 |
| 20.74 | -28 | 20.74 | -91 |
| 20.75 | -28 | 20.75 | -91 |
| 20.76 | -28 | 20.76 | -91 |
| 20.77 | -27 | 20.77 | -90 |
| 20.78 | -27 | 20.78 | -90 |
| 20.78 | -26 | 20.78 | -89 |
| 20.79 | -24 | 20.79 | -88 |
| 20.80 | -23 | 20.80 | -87 |
| 20.81 | -22 | 20.81 | -87 |
| 20.82 | -21 | 20.82 | -87 |
| 20.83 | -20 | 20.83 | -87 |
| 20.83 | -19 | 20.83 | -87 |
| 20.84 | -19 | 20.84 | -87 |
| 20.85 | -18 | 20.85 | -87 |
| 20.86 | -17 | 20.86 | -87 |
| 20.87 | -16 | 20.87 | -86 |
| 20.88 | -15 | 20.88 | -85 |
| 20.88 | -14 | 20.88 | -84 |
| 20.89 | -14 | 20.89 | -83 |
| 20.90 | -14 | 20.90 | -82 |
| 20.91 | -12 | 20.91 | -82 |
| 20.92 | -11 | 20.92 | -82 |
| 20.93 | -9  | 20.93 | -82 |
| 20.93 | -9  | 20.93 | -82 |
| 20.94 | -8  | 20.94 | -82 |
| 20.95 | -7  | 20.95 | -82 |
| 20.96 | -6  | 20.96 | -82 |
| 20.97 | -4  | 20.97 | -81 |
| 20.98 | -3  | 20.98 | -80 |
| 20.98 | -2  | 20.98 | -79 |
| 20.99 | -1  | 20.99 | -78 |
| 21.00 | 0   | 21.00 | -77 |
| 21.01 | 2   | 21.01 | -76 |
| 21.02 | 3   | 21.02 | -75 |
| 21.03 | 4   | 21.03 | -74 |
| 21.03 | 5   | 21.03 | -73 |
| 21.04 | 7   | 21.04 | -72 |
| 21.05 | 8   | 21.05 | -71 |
| 21.06 | 10  | 21.06 | -70 |
| 21.07 | 11  | 21.07 | -69 |
| 21.08 | 13  | 21.08 | -69 |

|       |    |       |     |
|-------|----|-------|-----|
| 21.08 | 14 | 21.08 | -69 |
| 21.09 | 15 | 21.09 | -69 |
| 21.10 | 16 | 21.10 | -69 |
| 21.11 | 16 | 21.11 | -68 |
| 21.12 | 17 | 21.12 | -68 |
| 21.13 | 18 | 21.13 | -67 |
| 21.13 | 18 | 21.13 | -67 |
| 21.14 | 19 | 21.14 | -66 |
| 21.15 | 20 | 21.15 | -65 |
| 21.16 | 21 | 21.16 | -65 |
| 21.17 | 22 | 21.17 | -64 |
| 21.18 | 24 | 21.18 | -64 |
| 21.18 | 25 | 21.18 | -63 |
| 21.19 | 27 | 21.19 | -63 |
| 21.20 | 28 | 21.20 | -62 |
| 21.21 | 29 | 21.21 | -62 |
| 21.22 | 31 | 21.22 | -61 |
| 21.23 | 33 | 21.23 | -60 |
| 21.23 | 34 | 21.23 | -59 |
| 21.24 | 36 | 21.24 | -58 |
| 21.25 | 37 | 21.25 | -57 |
| 21.26 | 38 | 21.26 | -57 |
| 21.27 | 40 | 21.27 | -56 |
| 21.28 | 42 | 21.28 | -55 |
| 21.28 | 43 | 21.28 | -54 |
| 21.29 | 45 | 21.29 | -53 |
| 21.30 | 46 | 21.30 | -52 |
| 21.31 | 47 | 21.31 | -51 |
| 21.32 | 48 | 21.32 | -51 |
| 21.33 | 50 | 21.33 | -50 |
| 21.33 | 51 | 21.33 | -50 |
| 21.34 | 53 | 21.34 | -50 |
| 21.35 | 55 | 21.35 | -49 |
| 21.36 | 57 | 21.36 | -49 |
| 21.37 | 59 | 21.37 | -49 |
| 21.38 | 61 | 21.38 | -48 |
| 21.38 | 63 | 21.38 | -48 |
| 21.39 | 65 | 21.39 | -48 |
| 21.40 | 66 | 21.40 | -48 |
| 21.41 | 68 | 21.41 | -47 |
| 21.42 | 70 | 21.42 | -46 |
| 21.43 | 72 | 21.43 | -45 |
| 21.43 | 74 | 21.43 | -44 |

|       |     |       |     |
|-------|-----|-------|-----|
| 21.44 | 75  | 21.44 | -43 |
| 21.45 | 77  | 21.45 | -42 |
| 21.46 | 79  | 21.46 | -41 |
| 21.47 | 81  | 21.47 | -40 |
| 21.48 | 82  | 21.48 | -39 |
| 21.48 | 83  | 21.48 | -39 |
| 21.49 | 85  | 21.49 | -38 |
| 21.50 | 86  | 21.50 | -37 |
| 21.51 | 88  | 21.51 | -37 |
| 21.52 | 90  | 21.52 | -36 |
| 21.53 | 93  | 21.53 | -35 |
| 21.53 | 94  | 21.53 | -35 |
| 21.54 | 95  | 21.54 | -34 |
| 21.55 | 96  | 21.55 | -34 |
| 21.56 | 97  | 21.56 | -33 |
| 21.57 | 98  | 21.57 | -32 |
| 21.58 | 100 | 21.58 | -31 |
| 21.58 | 102 | 21.58 | -29 |
| 21.59 | 104 | 21.59 | -28 |
| 21.60 | 105 | 21.60 | -27 |
| 21.61 | 106 | 21.61 | -26 |
| 21.62 | 107 | 21.62 | -25 |
| 21.63 | 109 | 21.63 | -23 |
| 21.63 | 111 | 21.63 | -22 |
| 21.64 | 112 | 21.64 | -21 |
| 21.65 | 114 | 21.65 | -20 |
| 21.66 | 115 | 21.66 | -19 |
| 21.67 | 117 | 21.67 | -18 |
| 21.68 | 119 | 21.68 | -17 |
| 21.68 | 122 | 21.68 | -16 |
| 21.69 | 124 | 21.69 | -15 |
| 21.70 | 125 | 21.70 | -15 |
| 21.71 | 127 | 21.71 | -14 |
| 21.72 | 129 | 21.72 | -14 |
| 21.73 | 131 | 21.73 | -13 |
| 21.73 | 133 | 21.73 | -12 |
| 21.74 | 135 | 21.74 | -11 |
| 21.75 | 136 | 21.75 | -10 |
| 21.76 | 138 | 21.76 | -9  |
| 21.77 | 139 | 21.77 | -8  |
| 21.78 | 140 | 21.78 | -7  |
| 21.78 | 140 | 21.78 | -7  |
| 21.79 | 141 | 21.79 | -6  |

|       |     |       |    |
|-------|-----|-------|----|
| 21.80 | 143 | 21.80 | -5 |
| 21.81 | 144 | 21.81 | -5 |
| 21.82 | 146 | 21.82 | -4 |
| 21.83 | 148 | 21.83 | -3 |
| 21.83 | 150 | 21.83 | -2 |
| 21.84 | 151 | 21.84 | -1 |
| 21.85 | 152 | 21.85 | 0  |
| 21.86 | 154 | 21.86 | 1  |
| 21.87 | 155 | 21.87 | 2  |
| 21.88 | 157 | 21.88 | 4  |
| 21.88 | 159 | 21.88 | 5  |
| 21.89 | 160 | 21.89 | 6  |
| 21.90 | 161 | 21.90 | 7  |
| 21.91 | 162 | 21.91 | 8  |
| 21.92 | 163 | 21.92 | 8  |
| 21.93 | 165 | 21.93 | 9  |
| 21.93 | 167 | 21.93 | 10 |
| 21.94 | 169 | 21.94 | 11 |
| 21.95 | 170 | 21.95 | 12 |
| 21.96 | 171 | 21.96 | 13 |
| 21.97 | 173 | 21.97 | 14 |
| 21.98 | 173 | 21.98 | 15 |
| 21.98 | 174 | 21.98 | 16 |
| 21.99 | 176 | 21.99 | 16 |
| 22.00 | 177 | 22.00 | 17 |
| 22.01 | 179 | 22.01 | 19 |
| 22.02 | 180 | 22.02 | 20 |
| 22.03 | 181 | 22.03 | 21 |
| 22.03 | 183 | 22.03 | 22 |
| 22.04 | 184 | 22.04 | 23 |
| 22.05 | 186 | 22.05 | 25 |
| 22.06 | 187 | 22.06 | 26 |
| 22.07 | 189 | 22.07 | 27 |
| 22.08 | 192 | 22.08 | 28 |
| 22.08 | 194 | 22.08 | 28 |
| 22.09 | 195 | 22.09 | 29 |
| 22.10 | 197 | 22.10 | 29 |
| 22.11 | 199 | 22.11 | 30 |
| 22.12 | 200 | 22.12 | 31 |
| 22.13 | 201 | 22.13 | 32 |
| 22.13 | 203 | 22.13 | 32 |
| 22.14 | 204 | 22.14 | 33 |
| 22.15 | 206 | 22.15 | 34 |

|       |     |       |    |
|-------|-----|-------|----|
| 22.16 | 207 | 22.16 | 35 |
| 22.17 | 208 | 22.17 | 36 |
| 22.18 | 209 | 22.18 | 38 |
| 22.18 | 210 | 22.18 | 38 |
| 22.19 | 211 | 22.19 | 40 |
| 22.20 | 213 | 22.20 | 41 |
| 22.21 | 215 | 22.21 | 42 |
| 22.22 | 217 | 22.22 | 44 |
| 22.23 | 218 | 22.23 | 45 |
| 22.23 | 220 | 22.23 | 46 |
| 22.24 | 221 | 22.24 | 47 |
| 22.25 | 223 | 22.25 | 48 |
| 22.26 | 224 | 22.26 | 48 |
| 22.27 | 225 | 22.27 | 48 |
| 22.28 | 226 | 22.28 | 49 |
| 22.28 | 227 | 22.28 | 51 |
| 22.29 | 229 | 22.29 | 53 |
| 22.30 | 230 | 22.30 | 54 |
| 22.31 | 231 | 22.31 | 56 |
| 22.32 | 232 | 22.32 | 57 |
| 22.33 | 233 | 22.33 | 58 |
| 22.33 | 234 | 22.33 | 60 |
| 22.34 | 235 | 22.34 | 62 |
| 22.35 | 237 | 22.35 | 63 |
| 22.36 | 239 | 22.36 | 64 |
| 22.37 | 241 | 22.37 | 65 |
| 22.38 | 243 | 22.38 | 66 |
| 22.38 | 245 | 22.38 | 67 |
| 22.39 | 246 | 22.39 | 68 |
| 22.40 | 247 | 22.40 | 69 |
| 22.41 | 248 | 22.41 | 71 |
| 22.42 | 249 | 22.42 | 72 |
| 22.43 | 250 | 22.43 | 73 |
| 22.43 | 252 | 22.43 | 74 |
| 22.44 | 254 | 22.44 | 76 |
| 22.45 | 256 | 22.45 | 78 |
| 22.46 | 257 | 22.46 | 80 |
| 22.47 | 258 | 22.47 | 82 |
| 22.48 | 260 | 22.48 | 83 |
| 22.48 | 261 | 22.48 | 85 |
| 22.49 | 262 | 22.49 | 85 |
| 22.50 | 263 | 22.50 | 86 |
| 22.51 | 264 | 22.51 | 87 |

|       |     |       |     |
|-------|-----|-------|-----|
| 22.52 | 265 | 22.52 | 88  |
| 22.53 | 266 | 22.53 | 89  |
| 22.53 | 267 | 22.53 | 91  |
| 22.54 | 268 | 22.54 | 91  |
| 22.55 | 270 | 22.55 | 92  |
| 22.56 | 270 | 22.56 | 93  |
| 22.57 | 271 | 22.57 | 95  |
| 22.58 | 273 | 22.58 | 96  |
| 22.58 | 275 | 22.58 | 98  |
| 22.59 | 276 | 22.59 | 99  |
| 22.60 | 277 | 22.60 | 100 |
| 22.61 | 279 | 22.61 | 102 |
| 22.62 | 280 | 22.62 | 103 |
| 22.63 | 281 | 22.63 | 105 |
| 22.63 | 282 | 22.63 | 107 |
| 22.64 | 283 | 22.64 | 108 |
| 22.65 | 284 | 22.65 | 109 |
| 22.66 | 285 | 22.66 | 111 |
| 22.67 | 287 | 22.67 | 112 |
| 22.68 | 289 | 22.68 | 113 |
| 22.68 | 290 | 22.68 | 114 |
| 22.69 | 292 | 22.69 | 116 |
| 22.70 | 293 | 22.70 | 118 |
| 22.71 | 295 | 22.71 | 119 |
| 22.72 | 296 | 22.72 | 120 |
| 22.73 | 297 | 22.73 | 122 |
| 22.73 | 299 | 22.73 | 124 |
| 22.74 | 300 | 22.74 | 125 |
| 22.75 | 301 | 22.75 | 126 |
| 22.76 | 303 | 22.76 | 127 |
| 22.77 | 304 | 22.77 | 127 |
| 22.78 | 305 | 22.78 | 128 |
| 22.78 | 305 | 22.78 | 130 |
| 22.79 | 306 | 22.79 | 131 |
| 22.80 | 307 | 22.80 | 133 |
| 22.81 | 309 | 22.81 | 134 |
| 22.82 | 311 | 22.82 | 136 |
| 22.83 | 312 | 22.83 | 137 |
| 22.83 | 314 | 22.83 | 139 |
| 22.84 | 316 | 22.84 | 140 |
| 22.85 | 318 | 22.85 | 142 |
| 22.86 | 320 | 22.86 | 144 |
| 22.87 | 322 | 22.87 | 146 |

|       |     |       |     |
|-------|-----|-------|-----|
| 22.88 | 323 | 22.88 | 148 |
| 22.88 | 325 | 22.88 | 150 |
| 22.89 | 326 | 22.89 | 151 |
| 22.90 | 328 | 22.90 | 152 |
| 22.91 | 330 | 22.91 | 154 |
| 22.92 | 332 | 22.92 | 156 |
| 22.93 | 334 | 22.93 | 158 |
| 22.93 | 336 | 22.93 | 160 |
| 22.94 | 337 | 22.94 | 162 |
| 22.95 | 339 | 22.95 | 163 |
| 22.96 | 340 | 22.96 | 165 |
| 22.97 | 342 | 22.97 | 167 |
| 22.98 | 343 | 22.98 | 169 |
| 22.98 | 345 | 22.98 | 171 |
| 22.99 | 348 | 22.99 | 172 |
| 23.00 | 350 | 23.00 | 173 |
| 23.01 | 351 | 23.01 | 175 |
| 23.02 | 353 | 23.02 | 176 |
| 23.03 | 355 | 23.03 | 177 |
| 23.03 | 357 | 23.03 | 179 |
| 23.04 | 359 | 23.04 | 181 |
| 23.05 | 361 | 23.05 | 184 |
| 23.06 | 363 | 23.06 | 186 |
| 23.07 | 365 | 23.07 | 188 |
| 23.08 | 367 | 23.08 | 190 |
| 23.08 | 369 | 23.08 | 192 |
| 23.09 | 371 | 23.09 | 194 |
| 23.10 | 373 | 23.10 | 196 |
| 23.11 | 374 | 23.11 | 197 |
| 23.12 | 376 | 23.12 | 198 |
| 23.13 | 377 | 23.13 | 200 |
| 23.13 | 379 | 23.13 | 202 |
| 23.14 | 382 | 23.14 | 203 |
| 23.15 | 384 | 23.15 | 206 |
| 23.16 | 387 | 23.16 | 208 |
| 23.17 | 390 | 23.17 | 210 |
| 23.18 | 392 | 23.18 | 212 |
| 23.18 | 394 | 23.18 | 215 |
| 23.19 | 396 | 23.19 | 217 |
| 23.20 | 397 | 23.20 | 219 |
| 23.21 | 399 | 23.21 | 221 |
| 23.22 | 400 | 23.22 | 223 |
| 23.23 | 403 | 23.23 | 225 |

|       |     |       |     |
|-------|-----|-------|-----|
| 23.23 | 404 | 23.23 | 226 |
| 23.24 | 406 | 23.24 | 228 |
| 23.25 | 408 | 23.25 | 230 |
| 23.26 | 411 | 23.26 | 232 |
| 23.27 | 413 | 23.27 | 234 |
| 23.28 | 416 | 23.28 | 236 |
| 23.28 | 419 | 23.28 | 238 |
| 23.29 | 422 | 23.29 | 240 |
| 23.30 | 424 | 23.30 | 243 |
| 23.31 | 426 | 23.31 | 245 |
| 23.32 | 429 | 23.32 | 247 |
| 23.33 | 432 | 23.33 | 249 |
| 23.33 | 434 | 23.33 | 250 |
| 23.34 | 436 | 23.34 | 252 |
| 23.35 | 439 | 23.35 | 253 |
| 23.36 | 441 | 23.36 | 255 |
| 23.37 | 443 | 23.37 | 257 |
| 23.38 | 446 | 23.38 | 259 |
| 23.38 | 448 | 23.38 | 261 |
| 23.39 | 450 | 23.39 | 264 |
| 23.40 | 453 | 23.40 | 266 |
| 23.41 | 455 | 23.41 | 268 |
| 23.42 | 457 | 23.42 | 270 |
| 23.43 | 459 | 23.43 | 271 |
| 23.43 | 461 | 23.43 | 272 |
| 23.44 | 463 | 23.44 | 274 |
| 23.45 | 464 | 23.45 | 276 |
| 23.46 | 466 | 23.46 | 279 |
| 23.47 | 468 | 23.47 | 281 |
| 23.48 | 470 | 23.48 | 283 |
| 23.48 | 473 | 23.48 | 285 |
| 23.49 | 475 | 23.49 | 287 |
| 23.50 | 477 | 23.50 | 289 |
| 23.51 | 480 | 23.51 | 291 |
| 23.52 | 483 | 23.52 | 294 |
| 23.53 | 486 | 23.53 | 297 |
| 23.53 | 488 | 23.53 | 299 |
| 23.54 | 490 | 23.54 | 301 |
| 23.55 | 492 | 23.55 | 303 |
| 23.56 | 494 | 23.56 | 304 |
| 23.57 | 497 | 23.57 | 306 |
| 23.58 | 500 | 23.58 | 308 |
| 23.58 | 503 | 23.58 | 310 |



|       |     |       |     |
|-------|-----|-------|-----|
| 23.59 | 506 | 23.59 | 312 |
| 23.60 | 509 | 23.60 | 313 |
| 23.61 | 511 | 23.61 | 315 |
| 23.62 | 514 | 23.62 | 317 |
| 23.63 | 516 | 23.63 | 319 |
| 23.63 | 518 | 23.63 | 321 |
| 23.64 | 520 | 23.64 | 323 |
| 23.65 | 522 | 23.65 | 325 |
| 23.66 | 525 | 23.66 | 327 |
| 23.67 | 527 | 23.67 | 329 |
| 23.68 | 530 | 23.68 | 331 |
| 23.68 | 531 | 23.68 | 333 |
| 23.69 | 533 | 23.69 | 335 |
| 23.70 | 535 | 23.70 | 337 |
| 23.71 | 537 | 23.71 | 340 |
| 23.72 | 540 | 23.72 | 342 |
| 23.73 | 542 | 23.73 | 344 |
| 23.73 | 544 | 23.73 | 346 |
| 23.74 | 546 | 23.74 | 348 |
| 23.75 | 548 | 23.75 | 350 |
| 23.76 | 550 | 23.76 | 352 |
| 23.77 | 552 | 23.77 | 354 |
| 23.78 | 554 | 23.78 | 356 |
| 23.78 | 556 | 23.78 | 358 |
| 23.79 | 558 | 23.79 | 360 |
| 23.80 | 560 | 23.80 | 362 |
| 23.81 | 562 | 23.81 | 364 |
| 23.82 | 564 | 23.82 | 367 |
| 23.83 | 565 | 23.83 | 369 |
| 23.83 | 567 | 23.83 | 371 |
| 23.84 | 569 | 23.84 | 373 |
| 23.85 | 571 | 23.85 | 375 |
| 23.86 | 573 | 23.86 | 377 |
| 23.87 | 576 | 23.87 | 380 |
| 23.88 | 578 | 23.88 | 382 |
| 23.88 | 580 | 23.88 | 384 |
| 23.89 | 582 | 23.89 | 387 |
| 23.90 | 584 | 23.90 | 389 |
| 23.91 | 586 | 23.91 | 391 |
| 23.92 | 588 | 23.92 | 392 |
| 23.93 | 591 | 23.93 | 395 |
| 23.93 | 593 | 23.93 | 397 |
| 23.94 | 594 | 23.94 | 399 |

|       |     |       |     |
|-------|-----|-------|-----|
| 23.95 | 595 | 23.95 | 402 |
| 23.96 | 597 | 23.96 | 404 |
| 23.97 | 599 | 23.97 | 406 |
| 23.98 | 602 | 23.98 | 408 |
| 23.98 | 604 | 23.98 | 410 |
| 23.99 | 607 | 23.99 | 412 |
| 24.00 | 609 | 24.00 | 415 |
| 24.01 | 611 | 24.01 | 418 |
| 24.02 | 612 | 24.02 | 420 |
| 24.03 | 615 | 24.03 | 422 |
| 24.03 | 616 | 24.03 | 423 |
| 24.04 | 619 | 24.04 | 425 |
| 24.05 | 621 | 24.05 | 426 |
| 24.06 | 623 | 24.06 | 428 |
| 24.07 | 625 | 24.07 | 431 |
| 24.08 | 626 | 24.08 | 433 |
| 24.08 | 627 | 24.08 | 436 |
| 24.09 | 628 | 24.09 | 437 |
| 24.10 | 629 | 24.10 | 440 |
| 24.11 | 630 | 24.11 | 442 |
| 24.12 | 632 | 24.12 | 444 |
| 24.13 | 634 | 24.13 | 446 |
| 24.13 | 636 | 24.13 | 448 |
| 24.14 | 638 | 24.14 | 449 |
| 24.15 | 639 | 24.15 | 451 |
| 24.16 | 641 | 24.16 | 452 |
| 24.17 | 642 | 24.17 | 454 |
| 24.18 | 643 | 24.18 | 455 |
| 24.18 | 645 | 24.18 | 457 |
| 24.19 | 647 | 24.19 | 459 |
| 24.20 | 649 | 24.20 | 460 |
| 24.21 | 650 | 24.21 | 462 |
| 24.22 | 652 | 24.22 | 463 |
| 24.23 | 653 | 24.23 | 465 |
| 24.23 | 656 | 24.23 | 466 |
| 24.24 | 657 | 24.24 | 468 |
| 24.25 | 659 | 24.25 | 470 |
| 24.26 | 660 | 24.26 | 472 |
| 24.27 | 661 | 24.27 | 475 |
| 24.28 | 662 | 24.28 | 476 |
| 24.28 | 664 | 24.28 | 478 |
| 24.29 | 666 | 24.29 | 480 |
| 24.30 | 667 | 24.30 | 481 |

|       |     |       |     |
|-------|-----|-------|-----|
| 24.31 | 669 | 24.31 | 482 |
| 24.32 | 671 | 24.32 | 483 |
| 24.33 | 672 | 24.33 | 485 |
| 24.33 | 673 | 24.33 | 486 |
| 24.34 | 675 | 24.34 | 488 |
| 24.35 | 676 | 24.35 | 490 |
| 24.36 | 678 | 24.36 | 492 |
| 24.37 | 680 | 24.37 | 494 |
| 24.38 | 681 | 24.38 | 496 |
| 24.38 | 682 | 24.38 | 497 |
| 24.39 | 684 | 24.39 | 499 |
| 24.40 | 685 | 24.40 | 501 |
| 24.41 | 688 | 24.41 | 503 |
| 24.42 | 690 | 24.42 | 504 |
| 24.43 | 691 | 24.43 | 506 |
| 24.43 | 693 | 24.43 | 508 |
| 24.44 | 694 | 24.44 | 510 |
| 24.45 | 696 | 24.45 | 512 |
| 24.46 | 698 | 24.46 | 513 |
| 24.47 | 699 | 24.47 | 515 |
| 24.48 | 700 | 24.48 | 516 |
| 24.48 | 701 | 24.48 | 517 |
| 24.49 | 703 | 24.49 | 519 |
| 24.50 | 704 | 24.50 | 520 |
| 24.51 | 705 | 24.51 | 521 |
| 24.52 | 706 | 24.52 | 523 |
| 24.53 | 707 | 24.53 | 524 |
| 24.53 | 707 | 24.53 | 525 |
| 24.54 | 707 | 24.54 | 527 |
| 24.55 | 708 | 24.55 | 529 |
| 24.56 | 709 | 24.56 | 531 |
| 24.57 | 710 | 24.57 | 533 |
| 24.58 | 711 | 24.58 | 536 |
| 24.58 | 712 | 24.58 | 538 |
| 24.59 | 714 | 24.59 | 539 |
| 24.60 | 716 | 24.60 | 541 |
| 24.61 | 717 | 24.61 | 543 |
| 24.62 | 719 | 24.62 | 544 |
| 24.63 | 720 | 24.63 | 545 |
| 24.63 | 721 | 24.63 | 546 |
| 24.64 | 722 | 24.64 | 547 |
| 24.65 | 724 | 24.65 | 548 |
| 24.66 | 725 | 24.66 | 549 |

|       |     |       |     |
|-------|-----|-------|-----|
| 24.67 | 727 | 24.67 | 550 |
| 24.68 | 727 | 24.68 | 552 |
| 24.68 | 728 | 24.68 | 553 |
| 24.69 | 728 | 24.69 | 553 |
| 24.70 | 729 | 24.70 | 555 |
| 24.71 | 729 | 24.71 | 557 |
| 24.72 | 730 | 24.72 | 558 |
| 24.73 | 731 | 24.73 | 560 |
| 24.73 | 732 | 24.73 | 561 |
| 24.74 | 733 | 24.74 | 561 |
| 24.75 | 733 | 24.75 | 563 |
| 24.76 | 734 | 24.76 | 564 |
| 24.77 | 735 | 24.77 | 565 |
| 24.78 | 736 | 24.78 | 566 |
| 24.78 | 736 | 24.78 | 566 |
| 24.79 | 737 | 24.79 | 567 |
| 24.80 | 737 | 24.80 | 567 |
| 24.81 | 737 | 24.81 | 568 |
| 24.82 | 737 | 24.82 | 569 |
| 24.83 | 737 | 24.83 | 570 |
| 24.83 | 738 | 24.83 | 572 |
| 24.84 | 738 | 24.84 | 573 |
| 24.85 | 739 | 24.85 | 574 |
| 24.86 | 739 | 24.86 | 575 |
| 24.87 | 739 | 24.87 | 577 |
| 24.88 | 739 | 24.88 | 578 |
| 24.88 | 739 | 24.88 | 579 |
| 24.89 | 739 | 24.89 | 580 |
| 24.90 | 740 | 24.90 | 580 |
| 24.91 | 740 | 24.91 | 581 |
| 24.92 | 741 | 24.92 | 582 |
| 24.93 | 742 | 24.93 | 584 |
| 24.93 | 742 | 24.93 | 585 |
| 24.94 | 742 | 24.94 | 586 |
| 24.95 | 742 | 24.95 | 586 |
| 24.96 | 743 | 24.96 | 587 |
| 24.97 | 743 | 24.97 | 588 |
| 24.98 | 743 | 24.98 | 588 |
| 24.98 | 743 | 24.98 | 589 |
| 24.99 | 744 | 24.99 | 590 |
| 25.00 | 744 | 25.00 | 592 |
| 25.01 | 744 | 25.01 | 593 |
| 25.02 | 744 | 25.02 | 594 |

|       |     |       |     |
|-------|-----|-------|-----|
| 25.03 | 744 | 25.03 | 594 |
| 25.03 | 744 | 25.03 | 595 |
| 25.04 | 745 | 25.04 | 594 |
| 25.05 | 744 | 25.05 | 595 |
| 25.06 | 744 | 25.06 | 596 |
| 25.07 | 744 | 25.07 | 597 |
| 25.08 | 744 | 25.08 | 598 |
| 25.08 | 744 | 25.08 | 598 |
| 25.09 | 745 | 25.09 | 598 |
| 25.10 | 744 | 25.10 | 599 |
| 25.11 | 744 | 25.11 | 599 |
| 25.12 | 743 | 25.12 | 600 |
| 25.13 | 743 | 25.13 | 601 |
| 25.13 | 743 | 25.13 | 602 |
| 25.14 | 743 | 25.14 | 602 |
| 25.15 | 743 | 25.15 | 603 |
| 25.16 | 743 | 25.16 | 603 |
| 25.17 | 743 | 25.17 | 604 |
| 25.18 | 743 | 25.18 | 604 |
| 25.18 | 742 | 25.18 | 606 |
| 25.19 | 742 | 25.19 | 607 |
| 25.20 | 742 | 25.20 | 608 |
| 25.21 | 742 | 25.21 | 609 |
| 25.22 | 741 | 25.22 | 609 |
| 25.23 | 742 | 25.23 | 609 |
| 25.23 | 742 | 25.23 | 609 |
| 25.24 | 743 | 25.24 | 609 |
| 25.25 | 743 | 25.25 | 609 |
| 25.26 | 743 | 25.26 | 609 |
| 25.27 | 743 | 25.27 | 610 |
| 25.28 | 743 | 25.28 | 611 |
| 25.28 | 742 | 25.28 | 612 |
| 25.29 | 742 | 25.29 | 614 |
| 25.30 | 742 | 25.30 | 615 |
| 25.31 | 742 | 25.31 | 615 |
| 25.32 | 743 | 25.32 | 614 |
| 25.33 | 743 | 25.33 | 615 |
| 25.33 | 742 | 25.33 | 616 |
| 25.34 | 742 | 25.34 | 616 |
| 25.35 | 741 | 25.35 | 617 |
| 25.36 | 741 | 25.36 | 618 |
| 25.37 | 741 | 25.37 | 620 |
| 25.38 | 742 | 25.38 | 621 |

|       |     |       |     |
|-------|-----|-------|-----|
| 25.38 | 742 | 25.38 | 621 |
| 25.39 | 742 | 25.39 | 622 |
| 25.40 | 743 | 25.40 | 623 |
| 25.41 | 743 | 25.41 | 624 |
| 25.42 | 744 | 25.42 | 624 |
| 25.43 | 745 | 25.43 | 625 |
| 25.43 | 746 | 25.43 | 626 |
| 25.44 | 746 | 25.44 | 627 |
| 25.45 | 747 | 25.45 | 628 |
| 25.46 | 748 | 25.46 | 629 |
| 25.47 | 749 | 25.47 | 630 |
| 25.48 | 750 | 25.48 | 630 |
| 25.48 | 751 | 25.48 | 631 |
| 25.49 | 751 | 25.49 | 632 |
| 25.50 | 752 | 25.50 | 633 |
| 25.51 | 753 | 25.51 | 635 |
| 25.52 | 754 | 25.52 | 636 |
| 25.53 | 755 | 25.53 | 636 |
| 25.53 | 756 | 25.53 | 637 |
| 25.54 | 757 | 25.54 | 638 |
| 25.55 | 758 | 25.55 | 639 |
| 25.56 | 759 | 25.56 | 640 |
| 25.57 | 759 | 25.57 | 640 |
| 25.58 | 759 | 25.58 | 641 |
| 25.58 | 760 | 25.58 | 641 |
| 25.59 | 762 | 25.59 | 642 |
| 25.60 | 763 | 25.60 | 644 |
| 25.61 | 764 | 25.61 | 645 |
| 25.62 | 764 | 25.62 | 647 |
| 25.63 | 765 | 25.63 | 648 |
| 25.63 | 766 | 25.63 | 649 |
| 25.64 | 767 | 25.64 | 650 |
| 25.65 | 768 | 25.65 | 651 |
| 25.66 | 769 | 25.66 | 652 |
| 25.67 | 770 | 25.67 | 654 |
| 25.68 | 771 | 25.68 | 656 |
| 25.68 | 773 | 25.68 | 657 |
| 25.69 | 774 | 25.69 | 657 |
| 25.70 | 776 | 25.70 | 658 |
| 25.71 | 777 | 25.71 | 658 |
| 25.72 | 778 | 25.72 | 660 |
| 25.73 | 779 | 25.73 | 661 |
| 25.73 | 779 | 25.73 | 663 |

|       |     |       |     |
|-------|-----|-------|-----|
| 25.74 | 780 | 25.74 | 665 |
| 25.75 | 781 | 25.75 | 666 |
| 25.76 | 782 | 25.76 | 669 |
| 25.77 | 784 | 25.77 | 670 |
| 25.78 | 785 | 25.78 | 671 |
| 25.78 | 786 | 25.78 | 672 |
| 25.79 | 786 | 25.79 | 673 |
| 25.80 | 787 | 25.80 | 674 |
| 25.81 | 787 | 25.81 | 676 |
| 25.82 | 788 | 25.82 | 678 |
| 25.83 | 788 | 25.83 | 680 |
| 25.83 | 789 | 25.83 | 681 |
| 25.84 | 790 | 25.84 | 682 |
| 25.85 | 791 | 25.85 | 684 |
| 25.86 | 793 | 25.86 | 686 |
| 25.87 | 794 | 25.87 | 687 |
| 25.88 | 795 | 25.88 | 688 |
| 25.88 | 795 | 25.88 | 689 |
| 25.89 | 796 | 25.89 | 689 |
| 25.90 | 797 | 25.90 | 690 |
| 25.91 | 797 | 25.91 | 691 |
| 25.92 | 798 | 25.92 | 691 |
| 25.93 | 798 | 25.93 | 692 |
| 25.93 | 798 | 25.93 | 692 |
| 25.94 | 798 | 25.94 | 693 |
| 25.95 | 799 | 25.95 | 694 |
| 25.96 | 799 | 25.96 | 695 |
| 25.97 | 800 | 25.97 | 696 |
| 25.98 | 800 | 25.98 | 697 |
| 25.98 | 800 | 25.98 | 698 |
| 25.99 | 800 | 25.99 | 699 |
| 26.00 | 800 | 26.00 | 701 |
| 26.01 | 799 | 26.01 | 702 |
| 26.02 | 800 | 26.02 | 704 |
| 26.03 | 800 | 26.03 | 705 |
| 26.03 | 799 | 26.03 | 706 |
| 26.04 | 800 | 26.04 | 706 |
| 26.05 | 800 | 26.05 | 707 |
| 26.06 | 800 | 26.06 | 706 |
| 26.07 | 799 | 26.07 | 706 |
| 26.08 | 798 | 26.08 | 706 |
| 26.08 | 798 | 26.08 | 707 |
| 26.09 | 798 | 26.09 | 708 |

|       |     |       |     |
|-------|-----|-------|-----|
| 26.10 | 798 | 26.10 | 709 |
| 26.11 | 798 | 26.11 | 710 |
| 26.12 | 798 | 26.12 | 711 |
| 26.13 | 797 | 26.13 | 711 |
| 26.13 | 797 | 26.13 | 711 |
| 26.14 | 796 | 26.14 | 712 |
| 26.15 | 795 | 26.15 | 712 |
| 26.16 | 794 | 26.16 | 712 |
| 26.17 | 793 | 26.17 | 712 |
| 26.18 | 793 | 26.18 | 712 |
| 26.18 | 793 | 26.18 | 712 |
| 26.19 | 793 | 26.19 | 712 |
| 26.20 | 793 | 26.20 | 712 |
| 26.21 | 793 | 26.21 | 711 |
| 26.22 | 792 | 26.22 | 712 |
| 26.23 | 792 | 26.23 | 712 |
| 26.23 | 791 | 26.23 | 711 |
| 26.24 | 790 | 26.24 | 711 |
| 26.25 | 789 | 26.25 | 711 |
| 26.26 | 788 | 26.26 | 711 |
| 26.27 | 788 | 26.27 | 711 |
| 26.28 | 787 | 26.28 | 711 |
| 26.28 | 786 | 26.28 | 711 |
| 26.29 | 785 | 26.29 | 711 |
| 26.30 | 784 | 26.30 | 710 |
| 26.31 | 782 | 26.31 | 710 |
| 26.32 | 781 | 26.32 | 710 |
| 26.33 | 780 | 26.33 | 710 |
| 26.33 | 779 | 26.33 | 709 |
| 26.34 | 778 | 26.34 | 709 |
| 26.35 | 777 | 26.35 | 708 |
| 26.36 | 776 | 26.36 | 708 |
| 26.37 | 775 | 26.37 | 709 |
| 26.38 | 775 | 26.38 | 710 |
| 26.38 | 774 | 26.38 | 710 |
| 26.39 | 774 | 26.39 | 710 |
| 26.40 | 773 | 26.40 | 710 |
| 26.41 | 772 | 26.41 | 710 |
| 26.42 | 771 | 26.42 | 710 |
| 26.43 | 769 | 26.43 | 710 |
| 26.43 | 768 | 26.43 | 709 |
| 26.44 | 766 | 26.44 | 708 |
| 26.45 | 765 | 26.45 | 707 |



|       |     |       |     |
|-------|-----|-------|-----|
| 26.46 | 765 | 26.46 | 706 |
| 26.47 | 764 | 26.47 | 705 |
| 26.48 | 763 | 26.48 | 705 |
| 26.48 | 761 | 26.48 | 705 |
| 26.49 | 760 | 26.49 | 704 |
| 26.50 | 759 | 26.50 | 703 |
| 26.51 | 758 | 26.51 | 702 |
| 26.52 | 757 | 26.52 | 702 |
| 26.53 | 756 | 26.53 | 701 |
| 26.53 | 755 | 26.53 | 699 |
| 26.54 | 754 | 26.54 | 698 |
| 26.55 | 754 | 26.55 | 698 |
| 26.56 | 752 | 26.56 | 697 |
| 26.57 | 751 | 26.57 | 697 |
| 26.58 | 751 | 26.58 | 697 |
| 26.58 | 750 | 26.58 | 696 |
| 26.59 | 749 | 26.59 | 696 |
| 26.60 | 748 | 26.60 | 696 |
| 26.61 | 746 | 26.61 | 695 |
| 26.62 | 745 | 26.62 | 694 |
| 26.63 | 744 | 26.63 | 694 |
| 26.63 | 743 | 26.63 | 693 |
| 26.64 | 742 | 26.64 | 692 |
| 26.65 | 742 | 26.65 | 692 |
| 26.66 | 740 | 26.66 | 691 |
| 26.67 | 739 | 26.67 | 690 |
| 26.68 | 737 | 26.68 | 689 |
| 26.68 | 736 | 26.68 | 688 |
| 26.69 | 734 | 26.69 | 687 |
| 26.70 | 733 | 26.70 | 686 |
| 26.71 | 731 | 26.71 | 685 |
| 26.72 | 730 | 26.72 | 684 |
| 26.73 | 728 | 26.73 | 684 |
| 26.73 | 727 | 26.73 | 684 |
| 26.74 | 726 | 26.74 | 683 |
| 26.75 | 725 | 26.75 | 682 |
| 26.76 | 723 | 26.76 | 682 |
| 26.77 | 721 | 26.77 | 681 |
| 26.78 | 718 | 26.78 | 680 |
| 26.78 | 716 | 26.78 | 679 |
| 26.79 | 714 | 26.79 | 678 |
| 26.80 | 712 | 26.80 | 677 |
| 26.81 | 711 | 26.81 | 676 |

|       |     |       |     |
|-------|-----|-------|-----|
| 26.82 | 709 | 26.82 | 675 |
| 26.83 | 708 | 26.83 | 674 |
| 26.83 | 706 | 26.83 | 674 |
| 26.84 | 705 | 26.84 | 673 |
| 26.85 | 703 | 26.85 | 671 |
| 26.86 | 702 | 26.86 | 670 |
| 26.87 | 701 | 26.87 | 669 |
| 26.88 | 700 | 26.88 | 668 |
| 26.88 | 699 | 26.88 | 667 |
| 26.89 | 698 | 26.89 | 666 |
| 26.90 | 697 | 26.90 | 665 |
| 26.91 | 696 | 26.91 | 664 |
| 26.92 | 694 | 26.92 | 663 |
| 26.93 | 692 | 26.93 | 663 |
| 26.93 | 691 | 26.93 | 662 |
| 26.94 | 690 | 26.94 | 662 |
| 26.95 | 689 | 26.95 | 661 |
| 26.96 | 688 | 26.96 | 660 |
| 26.97 | 686 | 26.97 | 659 |
| 26.98 | 684 | 26.98 | 659 |
| 26.98 | 682 | 26.98 | 658 |
| 26.99 | 680 | 26.99 | 656 |
| 27.00 | 679 | 27.00 | 655 |
| 27.01 | 678 | 27.01 | 653 |
| 27.02 | 676 | 27.02 | 652 |
| 27.03 | 675 | 27.03 | 652 |
| 27.03 | 673 | 27.03 | 651 |
| 27.04 | 671 | 27.04 | 650 |
| 27.05 | 669 | 27.05 | 649 |
| 27.06 | 668 | 27.06 | 647 |
| 27.07 | 667 | 27.07 | 646 |
| 27.08 | 665 | 27.08 | 644 |
| 27.08 | 664 | 27.08 | 642 |
| 27.09 | 663 | 27.09 | 641 |
| 27.10 | 662 | 27.10 | 640 |
| 27.11 | 661 | 27.11 | 639 |
| 27.12 | 660 | 27.12 | 637 |
| 27.13 | 659 | 27.13 | 636 |
| 27.13 | 657 | 27.13 | 635 |
| 27.14 | 656 | 27.14 | 634 |
| 27.15 | 654 | 27.15 | 633 |
| 27.16 | 652 | 27.16 | 632 |
| 27.17 | 650 | 27.17 | 632 |

|       |     |       |     |
|-------|-----|-------|-----|
| 27.18 | 649 | 27.18 | 630 |
| 27.18 | 647 | 27.18 | 629 |
| 27.19 | 645 | 27.19 | 628 |
| 27.20 | 643 | 27.20 | 627 |
| 27.21 | 641 | 27.21 | 626 |
| 27.22 | 640 | 27.22 | 625 |
| 27.23 | 638 | 27.23 | 625 |
| 27.23 | 636 | 27.23 | 624 |
| 27.24 | 635 | 27.24 | 623 |
| 27.25 | 634 | 27.25 | 622 |
| 27.26 | 633 | 27.26 | 620 |
| 27.27 | 632 | 27.27 | 619 |
| 27.28 | 631 | 27.28 | 618 |
| 27.28 | 629 | 27.28 | 617 |
| 27.29 | 628 | 27.29 | 615 |
| 27.30 | 626 | 27.30 | 614 |
| 27.31 | 623 | 27.31 | 613 |
| 27.32 | 621 | 27.32 | 612 |
| 27.33 | 618 | 27.33 | 610 |
| 27.33 | 616 | 27.33 | 609 |
| 27.34 | 615 | 27.34 | 608 |
| 27.35 | 614 | 27.35 | 607 |
| 27.36 | 612 | 27.36 | 606 |
| 27.37 | 611 | 27.37 | 604 |
| 27.38 | 610 | 27.38 | 604 |
| 27.38 | 608 | 27.38 | 602 |
| 27.39 | 607 | 27.39 | 601 |
| 27.40 | 605 | 27.40 | 600 |
| 27.41 | 603 | 27.41 | 598 |
| 27.42 | 601 | 27.42 | 597 |
| 27.43 | 599 | 27.43 | 596 |
| 27.43 | 597 | 27.43 | 595 |
| 27.44 | 596 | 27.44 | 595 |
| 27.45 | 596 | 27.45 | 595 |
| 27.46 | 595 | 27.46 | 595 |
| 27.47 | 594 | 27.47 | 594 |
| 27.48 | 593 | 27.48 | 593 |
| 27.48 | 592 | 27.48 | 592 |
| 27.49 | 591 | 27.49 | 591 |
| 27.50 | 590 | 27.50 | 590 |
| 27.51 | 588 | 27.51 | 588 |
| 27.52 | 587 | 27.52 | 587 |
| 27.53 | 585 | 27.53 | 585 |

|       |     |       |     |
|-------|-----|-------|-----|
| 27.53 | 583 | 27.53 | 584 |
| 27.54 | 581 | 27.54 | 582 |
| 27.55 | 580 | 27.55 | 580 |
| 27.56 | 579 | 27.56 | 579 |
| 27.57 | 577 | 27.57 | 577 |
| 27.58 | 575 | 27.58 | 576 |
| 27.58 | 574 | 27.58 | 574 |
| 27.59 | 572 | 27.59 | 574 |
| 27.60 | 570 | 27.60 | 573 |
| 27.61 | 568 | 27.61 | 571 |
| 27.62 | 567 | 27.62 | 570 |
| 27.63 | 565 | 27.63 | 569 |
| 27.63 | 563 | 27.63 | 568 |
| 27.64 | 562 | 27.64 | 567 |
| 27.65 | 561 | 27.65 | 566 |
| 27.66 | 560 | 27.66 | 565 |
| 27.67 | 559 | 27.67 | 564 |
| 27.68 | 558 | 27.68 | 562 |
| 27.68 | 557 | 27.68 | 561 |
| 27.69 | 556 | 27.69 | 561 |
| 27.70 | 554 | 27.70 | 560 |
| 27.71 | 552 | 27.71 | 558 |
| 27.72 | 550 | 27.72 | 557 |
| 27.73 | 548 | 27.73 | 555 |
| 27.73 | 546 | 27.73 | 553 |
| 27.74 | 544 | 27.74 | 552 |
| 27.75 | 543 | 27.75 | 550 |
| 27.76 | 542 | 27.76 | 549 |
| 27.77 | 541 | 27.77 | 547 |
| 27.78 | 539 | 27.78 | 546 |
| 27.78 | 538 | 27.78 | 544 |
| 27.79 | 537 | 27.79 | 544 |
| 27.80 | 536 | 27.80 | 543 |
| 27.81 | 536 | 27.81 | 542 |
| 27.82 | 535 | 27.82 | 541 |
| 27.83 | 534 | 27.83 | 539 |
| 27.83 | 533 | 27.83 | 537 |
| 27.84 | 531 | 27.84 | 536 |
| 27.85 | 529 | 27.85 | 534 |
| 27.86 | 527 | 27.86 | 534 |
| 27.87 | 525 | 27.87 | 533 |
| 27.88 | 523 | 27.88 | 531 |
| 27.88 | 521 | 27.88 | 529 |

|       |     |       |     |
|-------|-----|-------|-----|
| 27.89 | 519 | 27.89 | 528 |
| 27.90 | 518 | 27.90 | 526 |
| 27.91 | 517 | 27.91 | 525 |
| 27.92 | 516 | 27.92 | 523 |
| 27.93 | 515 | 27.93 | 522 |
| 27.93 | 513 | 27.93 | 521 |
| 27.94 | 511 | 27.94 | 520 |
| 27.95 | 510 | 27.95 | 519 |
| 27.96 | 509 | 27.96 | 518 |
| 27.97 | 508 | 27.97 | 517 |
| 27.98 | 506 | 27.98 | 516 |
| 27.98 | 505 | 27.98 | 514 |
| 27.99 | 503 | 27.99 | 513 |
| 28.00 | 502 | 28.00 | 512 |
| 28.01 | 501 | 28.01 | 511 |
| 28.02 | 500 | 28.02 | 509 |
| 28.03 | 500 | 28.03 | 508 |
| 28.03 | 499 | 28.03 | 507 |
| 28.04 | 498 | 28.04 | 505 |
| 28.05 | 496 | 28.05 | 504 |
| 28.06 | 495 | 28.06 | 503 |
| 28.07 | 494 | 28.07 | 502 |
| 28.08 | 493 | 28.08 | 501 |
| 28.08 | 493 | 28.08 | 501 |
| 28.09 | 491 | 28.09 | 500 |
| 28.10 | 490 | 28.10 | 498 |
| 28.11 | 489 | 28.11 | 497 |
| 28.12 | 488 | 28.12 | 496 |
| 28.13 | 486 | 28.13 | 495 |
| 28.13 | 485 | 28.13 | 495 |
| 28.14 | 484 | 28.14 | 494 |
| 28.15 | 483 | 28.15 | 493 |
| 28.16 | 482 | 28.16 | 492 |
| 28.17 | 482 | 28.17 | 491 |
| 28.18 | 481 | 28.18 | 490 |
| 28.18 | 480 | 28.18 | 490 |
| 28.19 | 478 | 28.19 | 489 |
| 28.20 | 477 | 28.20 | 488 |
| 28.21 | 476 | 28.21 | 487 |
| 28.22 | 475 | 28.22 | 486 |
| 28.23 | 474 | 28.23 | 485 |
| 28.23 | 473 | 28.23 | 484 |
| 28.24 | 473 | 28.24 | 483 |

|       |     |       |     |
|-------|-----|-------|-----|
| 28.25 | 473 | 28.25 | 482 |
| 28.26 | 472 | 28.26 | 481 |
| 28.27 | 470 | 28.27 | 480 |
| 28.28 | 470 | 28.28 | 480 |
| 28.28 | 470 | 28.28 | 479 |
| 28.29 | 469 | 28.29 | 479 |
| 28.30 | 468 | 28.30 | 478 |
| 28.31 | 467 | 28.31 | 478 |
| 28.32 | 466 | 28.32 | 477 |
| 28.33 | 465 | 28.33 | 476 |
| 28.33 | 464 | 28.33 | 476 |
| 28.34 | 464 | 28.34 | 475 |
| 28.35 | 463 | 28.35 | 475 |
| 28.36 | 462 | 28.36 | 474 |
| 28.37 | 461 | 28.37 | 474 |
| 28.38 | 460 | 28.38 | 473 |
| 28.38 | 460 | 28.38 | 472 |
| 28.39 | 459 | 28.39 | 472 |
| 28.40 | 459 | 28.40 | 472 |
| 28.41 | 459 | 28.41 | 471 |
| 28.42 | 460 | 28.42 | 471 |
| 28.43 | 460 | 28.43 | 469 |
| 28.43 | 460 | 28.43 | 468 |
| 28.44 | 459 | 28.44 | 467 |
| 28.45 | 459 | 28.45 | 466 |
| 28.46 | 457 | 28.46 | 465 |
| 28.47 | 455 | 28.47 | 464 |
| 28.48 | 454 | 28.48 | 463 |
| 28.48 | 453 | 28.48 | 463 |
| 28.49 | 452 | 28.49 | 463 |
| 28.50 | 452 | 28.50 | 462 |
| 28.51 | 451 | 28.51 | 461 |
| 28.52 | 451 | 28.52 | 460 |
| 28.53 | 451 | 28.53 | 459 |
| 28.53 | 451 | 28.53 | 458 |
| 28.54 | 450 | 28.54 | 458 |
| 28.55 | 450 | 28.55 | 458 |
| 28.56 | 449 | 28.56 | 457 |
| 28.57 | 448 | 28.57 | 457 |
| 28.58 | 448 | 28.58 | 456 |
| 28.58 | 447 | 28.58 | 455 |
| 28.59 | 446 | 28.59 | 454 |
| 28.60 | 445 | 28.60 | 454 |

|       |     |       |     |
|-------|-----|-------|-----|
| 28.61 | 444 | 28.61 | 454 |
| 28.62 | 443 | 28.62 | 454 |
| 28.63 | 443 | 28.63 | 454 |
| 28.63 | 442 | 28.63 | 453 |
| 28.64 | 441 | 28.64 | 453 |
| 28.65 | 440 | 28.65 | 452 |
| 28.66 | 440 | 28.66 | 452 |
| 28.67 | 439 | 28.67 | 451 |
| 28.68 | 439 | 28.68 | 449 |
| 28.68 | 438 | 28.68 | 448 |
| 28.69 | 438 | 28.69 | 448 |
| 28.70 | 438 | 28.70 | 447 |
| 28.71 | 438 | 28.71 | 446 |
| 28.72 | 437 | 28.72 | 446 |
| 28.73 | 437 | 28.73 | 446 |
| 28.73 | 436 | 28.73 | 446 |
| 28.74 | 435 | 28.74 | 446 |
| 28.75 | 435 | 28.75 | 445 |
| 28.76 | 434 | 28.76 | 444 |
| 28.77 | 433 | 28.77 | 443 |
| 28.78 | 433 | 28.78 | 442 |
| 28.78 | 432 | 28.78 | 441 |
| 28.79 | 431 | 28.79 | 440 |
| 28.80 | 430 | 28.80 | 440 |
| 28.81 | 430 | 28.81 | 439 |
| 28.82 | 430 | 28.82 | 439 |
| 28.83 | 429 | 28.83 | 438 |
| 28.83 | 428 | 28.83 | 438 |
| 28.84 | 427 | 28.84 | 437 |
| 28.85 | 426 | 28.85 | 436 |
| 28.86 | 425 | 28.86 | 436 |
| 28.87 | 424 | 28.87 | 436 |
| 28.88 | 424 | 28.88 | 435 |
| 28.88 | 424 | 28.88 | 434 |
| 28.89 | 423 | 28.89 | 433 |
| 28.90 | 423 | 28.90 | 431 |
| 28.91 | 423 | 28.91 | 430 |
| 28.92 | 423 | 28.92 | 429 |
| 28.93 | 422 | 28.93 | 428 |
| 28.93 | 421 | 28.93 | 427 |
| 28.94 | 420 | 28.94 | 426 |
| 28.95 | 420 | 28.95 | 425 |
| 28.96 | 419 | 28.96 | 424 |

|       |     |       |     |
|-------|-----|-------|-----|
| 28.97 | 419 | 28.97 | 423 |
| 28.98 | 418 | 28.98 | 423 |
| 28.98 | 417 | 28.98 | 422 |
| 28.99 | 416 | 28.99 | 422 |
| 29.00 | 415 | 29.00 | 420 |
| 29.01 | 413 | 29.01 | 418 |
| 29.02 | 412 | 29.02 | 417 |
| 29.03 | 411 | 29.03 | 416 |
| 29.03 | 410 | 29.03 | 414 |
| 29.04 | 409 | 29.04 | 414 |
| 29.05 | 408 | 29.05 | 412 |
| 29.06 | 407 | 29.06 | 411 |
| 29.07 | 405 | 29.07 | 409 |
| 29.08 | 404 | 29.08 | 409 |
| 29.08 | 403 | 29.08 | 408 |
| 29.09 | 402 | 29.09 | 407 |
| 29.10 | 400 | 29.10 | 405 |
| 29.11 | 397 | 29.11 | 404 |
| 29.12 | 394 | 29.12 | 403 |
| 29.13 | 392 | 29.13 | 401 |
| 29.13 | 390 | 29.13 | 399 |
| 29.14 | 388 | 29.14 | 397 |
| 29.15 | 386 | 29.15 | 395 |
| 29.16 | 383 | 29.16 | 394 |
| 29.17 | 380 | 29.17 | 392 |
| 29.18 | 377 | 29.18 | 389 |
| 29.18 | 374 | 29.18 | 387 |
| 29.19 | 371 | 29.19 | 384 |
| 29.20 | 368 | 29.20 | 381 |
| 29.21 | 364 | 29.21 | 379 |
| 29.22 | 360 | 29.22 | 376 |
| 29.23 | 355 | 29.23 | 373 |
| 29.23 | 350 | 29.23 | 369 |
| 29.24 | 345 | 29.24 | 365 |
| 29.25 | 340 | 29.25 | 361 |
| 29.26 | 334 | 29.26 | 356 |
| 29.27 | 328 | 29.27 | 350 |
| 29.28 | 321 | 29.28 | 344 |
| 29.28 | 314 | 29.28 | 337 |
| 29.29 | 305 | 29.29 | 330 |
| 29.30 | 295 | 29.30 | 322 |
| 29.31 | 285 | 29.31 | 313 |
| 29.32 | 273 | 29.32 | 304 |



|       |       |       |       |
|-------|-------|-------|-------|
| 29.33 | 261   | 29.33 | 294   |
| 29.33 | 248   | 29.33 | 282   |
| 29.34 | 233   | 29.34 | 270   |
| 29.35 | 217   | 29.35 | 256   |
| 29.36 | 200   | 29.36 | 241   |
| 29.37 | 181   | 29.37 | 225   |
| 29.38 | 160   | 29.38 | 206   |
| 29.38 | 137   | 29.38 | 185   |
| 29.39 | 112   | 29.39 | 162   |
| 29.40 | 85    | 29.40 | 138   |
| 29.41 | 55    | 29.41 | 111   |
| 29.42 | 23    | 29.42 | 81    |
| 29.43 | -12   | 29.43 | 49    |
| 29.43 | -50   | 29.43 | 14    |
| 29.44 | -92   | 29.44 | -24   |
| 29.45 | -137  | 29.45 | -65   |
| 29.46 | -187  | 29.46 | -109  |
| 29.47 | -240  | 29.47 | -157  |
| 29.48 | -297  | 29.48 | -208  |
| 29.48 | -358  | 29.48 | -264  |
| 29.49 | -424  | 29.49 | -325  |
| 29.50 | -494  | 29.50 | -389  |
| 29.51 | -569  | 29.51 | -457  |
| 29.52 | -649  | 29.52 | -531  |
| 29.53 | -733  | 29.53 | -609  |
| 29.53 | -824  | 29.53 | -693  |
| 29.54 | -919  | 29.54 | -781  |
| 29.55 | -1021 | 29.55 | -875  |
| 29.56 | -1127 | 29.56 | -974  |
| 29.57 | -1239 | 29.57 | -1079 |
| 29.58 | -1358 | 29.58 | -1191 |
| 29.58 | -1482 | 29.58 | -1307 |
| 29.59 | -1611 | 29.59 | -1429 |
| 29.60 | -1746 | 29.60 | -1556 |
| 29.61 | -1887 | 29.61 | -1690 |
| 29.62 | -2032 | 29.62 | -1829 |
| 29.63 | -2183 | 29.63 | -1973 |
| 29.63 | -2340 | 29.63 | -2122 |
| 29.64 | -2501 | 29.64 | -2277 |
| 29.65 | -2666 | 29.65 | -2436 |
| 29.66 | -2836 | 29.66 | -2598 |
| 29.67 | -3009 | 29.67 | -2765 |
| 29.68 | -3185 | 29.68 | -2935 |

|       |       |       |       |
|-------|-------|-------|-------|
| 29.68 | -3364 | 29.68 | -3108 |
| 29.69 | -3546 | 29.69 | -3284 |
| 29.70 | -3729 | 29.70 | -3463 |
| 29.71 | -3914 | 29.71 | -3643 |
| 29.72 | -4099 | 29.72 | -3825 |
| 29.73 | -4285 | 29.73 | -4008 |
| 29.73 | -4469 | 29.73 | -4192 |
| 29.74 | -4654 | 29.74 | -4375 |
| 29.75 | -4836 | 29.75 | -4557 |
| 29.76 | -5015 | 29.76 | -4736 |
| 29.77 | -5192 | 29.77 | -4913 |
| 29.78 | -5364 | 29.78 | -5088 |
| 29.78 | -5532 | 29.78 | -5259 |
| 29.79 | -5696 | 29.79 | -5425 |
| 29.80 | -5853 | 29.80 | -5586 |
| 29.81 | -6005 | 29.81 | -5742 |
| 29.82 | -6149 | 29.82 | -5891 |
| 29.83 | -6287 | 29.83 | -6034 |
| 29.83 | -6416 | 29.83 | -6170 |
| 29.84 | -6537 | 29.84 | -6297 |
| 29.85 | -6649 | 29.85 | -6417 |
| 29.86 | -6752 | 29.86 | -6529 |
| 29.87 | -6846 | 29.87 | -6630 |
| 29.88 | -6930 | 29.88 | -6722 |
| 29.88 | -7004 | 29.88 | -6804 |
| 29.89 | -7068 | 29.89 | -6878 |
| 29.90 | -7122 | 29.90 | -6941 |
| 29.91 | -7165 | 29.91 | -6995 |
| 29.92 | -7198 | 29.92 | -7038 |
| 29.93 | -7221 | 29.93 | -7070 |
| 29.93 | -7234 | 29.93 | -7092 |
| 29.94 | -7236 | 29.94 | -7103 |
| 29.95 | -7228 | 29.95 | -7104 |
| 29.96 | -7210 | 29.96 | -7095 |
| 29.97 | -7182 | 29.97 | -7076 |
| 29.98 | -7145 | 29.98 | -7048 |
| 29.98 | -7099 | 29.98 | -7010 |
| 29.99 | -7043 | 29.99 | -6964 |
| 30.00 | -6979 | 30.00 | -6910 |
| 30.01 | -6907 | 30.01 | -6846 |
| 30.02 | -6826 | 30.02 | -6774 |
| 30.03 | -6740 | 30.03 | -6695 |
| 30.03 | -6646 | 30.03 | -6608 |

|       |       |       |       |
|-------|-------|-------|-------|
| 30.04 | -6546 | 30.04 | -6516 |
| 30.05 | -6440 | 30.05 | -6417 |
| 30.06 | -6329 | 30.06 | -6312 |
| 30.07 | -6213 | 30.07 | -6203 |
| 30.08 | -6092 | 30.08 | -6089 |
| 30.08 | -5967 | 30.08 | -5970 |
| 30.09 | -5839 | 30.09 | -5848 |
| 30.10 | -5708 | 30.10 | -5722 |
| 30.11 | -5573 | 30.11 | -5595 |
| 30.12 | -5438 | 30.12 | -5464 |
| 30.13 | -5302 | 30.13 | -5332 |
| 30.13 | -5166 | 30.13 | -5199 |
| 30.14 | -5029 | 30.14 | -5064 |
| 30.15 | -4891 | 30.15 | -4929 |
| 30.16 | -4753 | 30.16 | -4793 |
| 30.17 | -4615 | 30.17 | -4658 |
| 30.18 | -4478 | 30.18 | -4523 |
| 30.18 | -4342 | 30.18 | -4388 |
| 30.19 | -4208 | 30.19 | -4255 |
| 30.20 | -4074 | 30.20 | -4124 |
| 30.21 | -3943 | 30.21 | -3994 |
| 30.22 | -3814 | 30.22 | -3865 |
| 30.23 | -3687 | 30.23 | -3738 |
| 30.23 | -3563 | 30.23 | -3614 |
| 30.24 | -3441 | 30.24 | -3493 |
| 30.25 | -3322 | 30.25 | -3374 |
| 30.26 | -3207 | 30.26 | -3258 |
| 30.27 | -3094 | 30.27 | -3144 |
| 30.28 | -2984 | 30.28 | -3033 |
| 30.28 | -2878 | 30.28 | -2925 |
| 30.29 | -2774 | 30.29 | -2820 |
| 30.30 | -2673 | 30.30 | -2717 |
| 30.31 | -2575 | 30.31 | -2619 |
| 30.32 | -2480 | 30.32 | -2523 |
| 30.33 | -2388 | 30.33 | -2430 |
| 30.33 | -2299 | 30.33 | -2340 |
| 30.34 | -2213 | 30.34 | -2253 |
| 30.35 | -2130 | 30.35 | -2169 |
| 30.36 | -2049 | 30.36 | -2087 |
| 30.37 | -1972 | 30.37 | -2009 |
| 30.38 | -1897 | 30.38 | -1933 |
| 30.38 | -1825 | 30.38 | -1860 |
| 30.39 | -1756 | 30.39 | -1789 |

|       |       |       |       |
|-------|-------|-------|-------|
| 30.40 | -1689 | 30.40 | -1721 |
| 30.41 | -1624 | 30.41 | -1656 |
| 30.42 | -1562 | 30.42 | -1593 |
| 30.43 | -1502 | 30.43 | -1532 |
| 30.43 | -1444 | 30.43 | -1474 |
| 30.44 | -1389 | 30.44 | -1417 |
| 30.45 | -1335 | 30.45 | -1364 |
| 30.46 | -1284 | 30.46 | -1312 |
| 30.47 | -1235 | 30.47 | -1262 |
| 30.48 | -1188 | 30.48 | -1214 |
| 30.48 | -1143 | 30.48 | -1167 |
| 30.49 | -1100 | 30.49 | -1123 |
| 30.50 | -1058 | 30.50 | -1080 |
| 30.51 | -1018 | 30.51 | -1039 |
| 30.52 | -979  | 30.52 | -1000 |
| 30.53 | -942  | 30.53 | -962  |
| 30.53 | -906  | 30.53 | -925  |
| 30.54 | -871  | 30.54 | -889  |
| 30.55 | -838  | 30.55 | -855  |
| 30.56 | -806  | 30.56 | -822  |
| 30.57 | -774  | 30.57 | -789  |
| 30.58 | -745  | 30.58 | -758  |
| 30.58 | -717  | 30.58 | -728  |
| 30.59 | -689  | 30.59 | -699  |
| 30.60 | -662  | 30.60 | -672  |
| 30.61 | -636  | 30.61 | -646  |
| 30.62 | -610  | 30.62 | -620  |
| 30.63 | -584  | 30.63 | -594  |
| 30.63 | -560  | 30.63 | -570  |
| 30.64 | -536  | 30.64 | -546  |
| 30.65 | -513  | 30.65 | -524  |
| 30.66 | -491  | 30.66 | -501  |
| 30.67 | -470  | 30.67 | -480  |
| 30.68 | -450  | 30.68 | -459  |
| 30.68 | -430  | 30.68 | -438  |
| 30.69 | -411  | 30.69 | -418  |
| 30.70 | -393  | 30.70 | -399  |
| 30.71 | -376  | 30.71 | -380  |
| 30.72 | -359  | 30.72 | -362  |
| 30.73 | -342  | 30.73 | -345  |
| 30.73 | -326  | 30.73 | -328  |
| 30.74 | -310  | 30.74 | -312  |
| 30.75 | -295  | 30.75 | -296  |

|       |      |       |      |
|-------|------|-------|------|
| 30.76 | -280 | 30.76 | -280 |
| 30.77 | -266 | 30.77 | -265 |
| 30.78 | -252 | 30.78 | -251 |
| 30.78 | -238 | 30.78 | -237 |
| 30.79 | -225 | 30.79 | -224 |
| 30.80 | -212 | 30.80 | -209 |
| 30.81 | -199 | 30.81 | -195 |
| 30.82 | -186 | 30.82 | -181 |
| 30.83 | -174 | 30.83 | -168 |
| 30.83 | -162 | 30.83 | -156 |
| 30.84 | -152 | 30.84 | -144 |
| 30.85 | -141 | 30.85 | -133 |
| 30.86 | -130 | 30.86 | -122 |
| 30.87 | -120 | 30.87 | -111 |
| 30.88 | -109 | 30.88 | -101 |
| 30.88 | -98  | 30.88 | -91  |
| 30.89 | -87  | 30.89 | -81  |
| 30.90 | -77  | 30.90 | -72  |
| 30.91 | -67  | 30.91 | -62  |
| 30.92 | -59  | 30.92 | -53  |
| 30.93 | -50  | 30.93 | -44  |
| 30.93 | -42  | 30.93 | -35  |
| 30.94 | -34  | 30.94 | -26  |
| 30.95 | -25  | 30.95 | -18  |
| 30.96 | -17  | 30.96 | -9   |
| 30.97 | -10  | 30.97 | -1   |
| 30.98 | -3   | 30.98 | 7    |
| 30.98 | 4    | 30.98 | 15   |
| 30.99 | 12   | 30.99 | 23   |
| 31.00 | 19   | 31.00 | 31   |
| 31.01 | 26   | 31.01 | 39   |
| 31.02 | 33   | 31.02 | 46   |
| 31.03 | 40   | 31.03 | 53   |
| 31.03 | 46   | 31.03 | 60   |
| 31.04 | 52   | 31.04 | 67   |
| 31.05 | 59   | 31.05 | 74   |
| 31.06 | 66   | 31.06 | 80   |
| 31.07 | 73   | 31.07 | 86   |
| 31.08 | 79   | 31.08 | 93   |
| 31.08 | 85   | 31.08 | 99   |
| 31.09 | 91   | 31.09 | 104  |
| 31.10 | 97   | 31.10 | 110  |
| 31.11 | 104  | 31.11 | 116  |

|       |     |       |     |
|-------|-----|-------|-----|
| 31.12 | 109 | 31.12 | 121 |
| 31.13 | 114 | 31.13 | 126 |
| 31.13 | 119 | 31.13 | 130 |
| 31.14 | 124 | 31.14 | 136 |
| 31.15 | 129 | 31.15 | 141 |
| 31.16 | 134 | 31.16 | 145 |
| 31.17 | 139 | 31.17 | 150 |
| 31.18 | 144 | 31.18 | 155 |
| 31.18 | 149 | 31.18 | 160 |
| 31.19 | 153 | 31.19 | 166 |
| 31.20 | 157 | 31.20 | 171 |
| 31.21 | 161 | 31.21 | 175 |
| 31.22 | 165 | 31.22 | 179 |
| 31.23 | 169 | 31.23 | 183 |
| 31.23 | 172 | 31.23 | 188 |
| 31.24 | 176 | 31.24 | 192 |
| 31.25 | 180 | 31.25 | 196 |
| 31.26 | 184 | 31.26 | 200 |
| 31.27 | 188 | 31.27 | 204 |
| 31.28 | 192 | 31.28 | 207 |
| 31.28 | 195 | 31.28 | 211 |
| 31.29 | 199 | 31.29 | 215 |
| 31.30 | 202 | 31.30 | 219 |
| 31.31 | 205 | 31.31 | 222 |
| 31.32 | 208 | 31.32 | 225 |
| 31.33 | 211 | 31.33 | 229 |
| 31.33 | 214 | 31.33 | 232 |
| 31.34 | 217 | 31.34 | 235 |
| 31.35 | 220 | 31.35 | 238 |
| 31.36 | 223 | 31.36 | 241 |
| 31.37 | 225 | 31.37 | 243 |
| 31.38 | 228 | 31.38 | 246 |
| 31.38 | 231 | 31.38 | 248 |
| 31.39 | 233 | 31.39 | 250 |
| 31.40 | 236 | 31.40 | 253 |
| 31.41 | 240 | 31.41 | 255 |
| 31.42 | 243 | 31.42 | 258 |
| 31.43 | 246 | 31.43 | 261 |
| 31.43 | 248 | 31.43 | 263 |
| 31.44 | 251 | 31.44 | 266 |
| 31.45 | 252 | 31.45 | 268 |
| 31.46 | 254 | 31.46 | 269 |
| 31.47 | 255 | 31.47 | 271 |

|       |     |       |     |
|-------|-----|-------|-----|
| 31.48 | 256 | 31.48 | 273 |
| 31.48 | 258 | 31.48 | 275 |
| 31.49 | 259 | 31.49 | 277 |
| 31.50 | 261 | 31.50 | 279 |
| 31.51 | 264 | 31.51 | 280 |
| 31.52 | 266 | 31.52 | 281 |
| 31.53 | 268 | 31.53 | 283 |
| 31.53 | 270 | 31.53 | 284 |
| 31.54 | 272 | 31.54 | 285 |
| 31.55 | 274 | 31.55 | 287 |
| 31.56 | 275 | 31.56 | 288 |
| 31.57 | 276 | 31.57 | 290 |
| 31.58 | 273 | 31.58 | 291 |
| 31.58 | 270 | 31.58 | 292 |
| 31.59 | 270 | 31.59 | 294 |
| 31.60 | 272 | 31.60 | 295 |
| 31.61 | 274 | 31.61 | 297 |
| 31.62 | 276 | 31.62 | 298 |
| 31.63 | 278 | 31.63 | 299 |
| 31.63 | 281 | 31.63 | 300 |
| 31.64 | 283 | 31.64 | 301 |
| 31.65 | 285 | 31.65 | 302 |
| 31.66 | 287 | 31.66 | 303 |
| 31.67 | 288 | 31.67 | 303 |
| 31.68 | 289 | 31.68 | 303 |
| 31.68 | 290 | 31.68 | 304 |
| 31.69 | 291 | 31.69 | 304 |
| 31.70 | 292 | 31.70 | 305 |
| 31.71 | 292 | 31.71 | 305 |
| 31.72 | 293 | 31.72 | 306 |
| 31.73 | 293 | 31.73 | 308 |
| 31.73 | 294 | 31.73 | 309 |
| 31.74 | 295 | 31.74 | 309 |
| 31.75 | 295 | 31.75 | 310 |
| 31.76 | 296 | 31.76 | 310 |
| 31.77 | 297 | 31.77 | 310 |
| 31.78 | 297 | 31.78 | 311 |
| 31.78 | 297 | 31.78 | 311 |
| 31.79 | 298 | 31.79 | 311 |
| 31.80 | 299 | 31.80 | 312 |
| 31.81 | 300 | 31.81 | 312 |
| 31.82 | 300 | 31.82 | 312 |
| 31.83 | 301 | 31.83 | 313 |

|       |     |       |     |
|-------|-----|-------|-----|
| 31.83 | 302 | 31.83 | 314 |
| 31.84 | 303 | 31.84 | 314 |
| 31.85 | 303 | 31.85 | 315 |
| 31.86 | 304 | 31.86 | 316 |
| 31.87 | 305 | 31.87 | 316 |
| 31.88 | 305 | 31.88 | 317 |
| 31.88 | 306 | 31.88 | 318 |
| 31.89 | 306 | 31.89 | 318 |
| 31.90 | 307 | 31.90 | 318 |
| 31.91 | 307 | 31.91 | 318 |
| 31.92 | 307 | 31.92 | 319 |
| 31.93 | 308 | 31.93 | 319 |
| 31.93 | 308 | 31.93 | 319 |
| 31.94 | 309 | 31.94 | 319 |
| 31.95 | 309 | 31.95 | 320 |
| 31.96 | 308 | 31.96 | 320 |
| 31.97 | 308 | 31.97 | 320 |
| 31.98 | 308 | 31.98 | 319 |
| 31.98 | 309 | 31.98 | 319 |
| 31.99 | 310 | 31.99 | 319 |
| 32.00 | 311 | 32.00 | 320 |
| 32.01 | 311 | 32.01 | 321 |
| 32.02 | 311 | 32.02 | 321 |
| 32.03 | 312 | 32.03 | 321 |
| 32.03 | 312 | 32.03 | 322 |
| 32.04 | 313 | 32.04 | 323 |
| 32.05 | 314 | 32.05 | 323 |
| 32.06 | 315 | 32.06 | 323 |
| 32.07 | 316 | 32.07 | 323 |
| 32.08 | 317 | 32.08 | 323 |
| 32.08 | 318 | 32.08 | 324 |
| 32.09 | 318 | 32.09 | 324 |
| 32.10 | 318 | 32.10 | 324 |
| 32.11 | 319 | 32.11 | 324 |
| 32.12 | 320 | 32.12 | 325 |
| 32.13 | 321 | 32.13 | 325 |
| 32.13 | 321 | 32.13 | 326 |
| 32.14 | 321 | 32.14 | 326 |
| 32.15 | 322 | 32.15 | 326 |
| 32.16 | 322 | 32.16 | 327 |
| 32.17 | 322 | 32.17 | 328 |
| 32.18 | 322 | 32.18 | 328 |
| 32.18 | 322 | 32.18 | 328 |



|       |     |       |     |
|-------|-----|-------|-----|
| 32.19 | 322 | 32.19 | 329 |
| 32.20 | 321 | 32.20 | 329 |
| 32.21 | 322 | 32.21 | 329 |
| 32.22 | 323 | 32.22 | 330 |
| 32.23 | 323 | 32.23 | 330 |
| 32.23 | 323 | 32.23 | 330 |
| 32.24 | 323 | 32.24 | 330 |
| 32.25 | 324 | 32.25 | 330 |
| 32.26 | 325 | 32.26 | 330 |
| 32.27 | 325 | 32.27 | 330 |
| 32.28 | 327 | 32.28 | 331 |
| 32.28 | 327 | 32.28 | 331 |
| 32.29 | 328 | 32.29 | 332 |
| 32.30 | 329 | 32.30 | 333 |
| 32.31 | 330 | 32.31 | 333 |
| 32.32 | 331 | 32.32 | 333 |
| 32.33 | 331 | 32.33 | 333 |
| 32.33 | 331 | 32.33 | 333 |
| 32.34 | 331 | 32.34 | 333 |
| 32.35 | 332 | 32.35 | 333 |
| 32.36 | 332 | 32.36 | 333 |
| 32.37 | 332 | 32.37 | 332 |
| 32.38 | 332 | 32.38 | 332 |
| 32.38 | 333 | 32.38 | 333 |
| 32.39 | 333 | 32.39 | 333 |
| 32.40 | 333 | 32.40 | 333 |
| 32.41 | 333 | 32.41 | 333 |
| 32.42 | 333 | 32.42 | 332 |
| 32.43 | 333 | 32.43 | 332 |
| 32.43 | 334 | 32.43 | 332 |
| 32.44 | 334 | 32.44 | 332 |
| 32.45 | 335 | 32.45 | 332 |
| 32.46 | 335 | 32.46 | 332 |
| 32.47 | 336 | 32.47 | 332 |
| 32.48 | 335 | 32.48 | 333 |
| 32.48 | 335 | 32.48 | 333 |
| 32.49 | 334 | 32.49 | 333 |
| 32.50 | 334 | 32.50 | 334 |
| 32.51 | 334 | 32.51 | 334 |
| 32.52 | 333 | 32.52 | 334 |
| 32.53 | 334 | 32.53 | 335 |
| 32.53 | 334 | 32.53 | 335 |
| 32.54 | 334 | 32.54 | 334 |

|       |     |       |     |
|-------|-----|-------|-----|
| 32.55 | 334 | 32.55 | 334 |
| 32.56 | 333 | 32.56 | 334 |
| 32.57 | 332 | 32.57 | 333 |
| 32.58 | 332 | 32.58 | 332 |
| 32.58 | 331 | 32.58 | 331 |
| 32.59 | 330 | 32.59 | 329 |
| 32.60 | 329 | 32.60 | 328 |
| 32.61 | 328 | 32.61 | 327 |
| 32.62 | 327 | 32.62 | 326 |
| 32.63 | 327 | 32.63 | 325 |
| 32.63 | 326 | 32.63 | 324 |
| 32.64 | 325 | 32.64 | 324 |
| 32.65 | 323 | 32.65 | 323 |
| 32.66 | 320 | 32.66 | 323 |
| 32.67 | 319 | 32.67 | 321 |
| 32.68 | 317 | 32.68 | 320 |
| 32.68 | 316 | 32.68 | 318 |
| 32.69 | 314 | 32.69 | 317 |
| 32.70 | 312 | 32.70 | 316 |
| 32.71 | 310 | 32.71 | 314 |
| 32.72 | 308 | 32.72 | 312 |
| 32.73 | 306 | 32.73 | 310 |
| 32.73 | 304 | 32.73 | 308 |
| 32.74 | 301 | 32.74 | 306 |
| 32.75 | 299 | 32.75 | 303 |
| 32.76 | 297 | 32.76 | 299 |
| 32.77 | 294 | 32.77 | 296 |
| 32.78 | 291 | 32.78 | 293 |
| 32.78 | 287 | 32.78 | 290 |
| 32.79 | 282 | 32.79 | 286 |
| 32.80 | 277 | 32.80 | 283 |
| 32.81 | 272 | 32.81 | 278 |
| 32.82 | 266 | 32.82 | 274 |
| 32.83 | 262 | 32.83 | 269 |
| 32.83 | 257 | 32.83 | 264 |
| 32.84 | 251 | 32.84 | 259 |
| 32.85 | 245 | 32.85 | 253 |
| 32.86 | 239 | 32.86 | 248 |
| 32.87 | 233 | 32.87 | 243 |
| 32.88 | 226 | 32.88 | 237 |
| 32.88 | 219 | 32.88 | 232 |
| 32.89 | 212 | 32.89 | 226 |
| 32.90 | 205 | 32.90 | 219 |

|       |      |       |      |
|-------|------|-------|------|
| 32.91 | 198  | 32.91 | 213  |
| 32.92 | 190  | 32.92 | 206  |
| 32.93 | 183  | 32.93 | 198  |
| 32.93 | 174  | 32.93 | 191  |
| 32.94 | 166  | 32.94 | 183  |
| 32.95 | 158  | 32.95 | 175  |
| 32.96 | 150  | 32.96 | 168  |
| 32.97 | 141  | 32.97 | 160  |
| 32.98 | 133  | 32.98 | 152  |
| 32.98 | 125  | 32.98 | 143  |
| 32.99 | 117  | 32.99 | 135  |
| 33.00 | 108  | 33.00 | 127  |
| 33.01 | 99   | 33.01 | 118  |
| 33.02 | 89   | 33.02 | 108  |
| 33.03 | 80   | 33.03 | 98   |
| 33.03 | 71   | 33.03 | 89   |
| 33.04 | 62   | 33.04 | 80   |
| 33.05 | 52   | 33.05 | 71   |
| 33.06 | 43   | 33.06 | 62   |
| 33.07 | 34   | 33.07 | 52   |
| 33.08 | 24   | 33.08 | 43   |
| 33.08 | 15   | 33.08 | 34   |
| 33.09 | 5    | 33.09 | 24   |
| 33.10 | -4   | 33.10 | 16   |
| 33.11 | -13  | 33.11 | 7    |
| 33.12 | -22  | 33.12 | -2   |
| 33.13 | -31  | 33.13 | -12  |
| 33.13 | -40  | 33.13 | -21  |
| 33.14 | -49  | 33.14 | -31  |
| 33.15 | -58  | 33.15 | -40  |
| 33.16 | -67  | 33.16 | -49  |
| 33.17 | -75  | 33.17 | -57  |
| 33.18 | -83  | 33.18 | -65  |
| 33.18 | -90  | 33.18 | -72  |
| 33.19 | -97  | 33.19 | -79  |
| 33.20 | -105 | 33.20 | -86  |
| 33.21 | -111 | 33.21 | -93  |
| 33.22 | -117 | 33.22 | -99  |
| 33.23 | -123 | 33.23 | -105 |
| 33.23 | -129 | 33.23 | -111 |
| 33.24 | -134 | 33.24 | -116 |
| 33.25 | -138 | 33.25 | -122 |
| 33.26 | -141 | 33.26 | -127 |

|       |      |       |      |
|-------|------|-------|------|
| 33.27 | -144 | 33.27 | -132 |
| 33.28 | -147 | 33.28 | -137 |
| 33.28 | -150 | 33.28 | -141 |
| 33.29 | -154 | 33.29 | -144 |
| 33.30 | -157 | 33.30 | -147 |
| 33.31 | -159 | 33.31 | -150 |
| 33.32 | -161 | 33.32 | -153 |
| 33.33 | -162 | 33.33 | -155 |
| 33.33 | -163 | 33.33 | -157 |
| 33.34 | -163 | 33.34 | -158 |
| 33.35 | -162 | 33.35 | -158 |
| 33.36 | -162 | 33.36 | -159 |
| 33.37 | -162 | 33.37 | -159 |
| 33.38 | -161 | 33.38 | -158 |
| 33.38 | -160 | 33.38 | -158 |
| 33.39 | -160 | 33.39 | -156 |
| 33.40 | -158 | 33.40 | -154 |
| 33.41 | -154 | 33.41 | -152 |
| 33.42 | -151 | 33.42 | -150 |
| 33.43 | -148 | 33.43 | -147 |
| 33.43 | -144 | 33.43 | -145 |
| 33.44 | -140 | 33.44 | -142 |
| 33.45 | -135 | 33.45 | -139 |
| 33.46 | -131 | 33.46 | -136 |
| 33.47 | -127 | 33.47 | -133 |
| 33.48 | -122 | 33.48 | -129 |
| 33.48 | -117 | 33.48 | -126 |
| 33.49 | -112 | 33.49 | -121 |
| 33.50 | -106 | 33.50 | -117 |
| 33.51 | -101 | 33.51 | -112 |
| 33.52 | -95  | 33.52 | -108 |
| 33.53 | -89  | 33.53 | -103 |
| 33.53 | -83  | 33.53 | -97  |
| 33.54 | -78  | 33.54 | -91  |
| 33.55 | -73  | 33.55 | -86  |
| 33.56 | -66  | 33.56 | -80  |
| 33.57 | -60  | 33.57 | -74  |
| 33.58 | -53  | 33.58 | -67  |
| 33.58 | -47  | 33.58 | -60  |
| 33.59 | -39  | 33.59 | -54  |
| 33.60 | -32  | 33.60 | -47  |
| 33.61 | -26  | 33.61 | -40  |
| 33.62 | -18  | 33.62 | -33  |

|       |     |       |     |
|-------|-----|-------|-----|
| 33.63 | -11 | 33.63 | -26 |
| 33.63 | -3  | 33.63 | -19 |
| 33.64 | 4   | 33.64 | -12 |
| 33.65 | 10  | 33.65 | -5  |
| 33.66 | 17  | 33.66 | 3   |
| 33.67 | 23  | 33.67 | 11  |
| 33.68 | 30  | 33.68 | 18  |
| 33.68 | 36  | 33.68 | 24  |
| 33.69 | 43  | 33.69 | 30  |
| 33.70 | 49  | 33.70 | 36  |
| 33.71 | 56  | 33.71 | 42  |
| 33.72 | 63  | 33.72 | 48  |
| 33.73 | 70  | 33.73 | 54  |
| 33.73 | 77  | 33.73 | 60  |
| 33.74 | 82  | 33.74 | 66  |
| 33.75 | 88  | 33.75 | 72  |
| 33.76 | 93  | 33.76 | 78  |
| 33.77 | 99  | 33.77 | 83  |
| 33.78 | 106 | 33.78 | 89  |
| 33.78 | 112 | 33.78 | 96  |
| 33.79 | 118 | 33.79 | 102 |
| 33.80 | 124 | 33.80 | 108 |
| 33.81 | 130 | 33.81 | 114 |
| 33.82 | 135 | 33.82 | 119 |
| 33.83 | 140 | 33.83 | 125 |
| 33.83 | 145 | 33.83 | 130 |
| 33.84 | 150 | 33.84 | 135 |
| 33.85 | 156 | 33.85 | 140 |
| 33.86 | 162 | 33.86 | 144 |
| 33.87 | 168 | 33.87 | 149 |
| 33.88 | 173 | 33.88 | 153 |
| 33.88 | 177 | 33.88 | 157 |
| 33.89 | 182 | 33.89 | 161 |
| 33.90 | 186 | 33.90 | 166 |
| 33.91 | 191 | 33.91 | 171 |
| 33.92 | 195 | 33.92 | 176 |
| 33.93 | 199 | 33.93 | 179 |
| 33.93 | 204 | 33.93 | 183 |
| 33.94 | 208 | 33.94 | 187 |
| 33.95 | 213 | 33.95 | 191 |
| 33.96 | 217 | 33.96 | 195 |
| 33.97 | 220 | 33.97 | 199 |
| 33.98 | 224 | 33.98 | 203 |

|       |     |       |     |
|-------|-----|-------|-----|
| 33.98 | 227 | 33.98 | 206 |
| 33.99 | 231 | 33.99 | 210 |
| 34.00 | 234 | 34.00 | 213 |
| 34.01 | 237 | 34.01 | 216 |
| 34.02 | 240 | 34.02 | 219 |
| 34.03 | 244 | 34.03 | 222 |
| 34.03 | 247 | 34.03 | 224 |
| 34.04 | 249 | 34.04 | 228 |
| 34.05 | 252 | 34.05 | 232 |
| 34.06 | 255 | 34.06 | 235 |
| 34.07 | 258 | 34.07 | 238 |
| 34.08 | 260 | 34.08 | 240 |
| 34.08 | 263 | 34.08 | 242 |
| 34.09 | 265 | 34.09 | 244 |
| 34.10 | 267 | 34.10 | 246 |
| 34.11 | 270 | 34.11 | 248 |
| 34.12 | 273 | 34.12 | 250 |
| 34.13 | 276 | 34.13 | 253 |
| 34.13 | 278 | 34.13 | 256 |
| 34.14 | 281 | 34.14 | 258 |
| 34.15 | 284 | 34.15 | 261 |
| 34.16 | 286 | 34.16 | 263 |
| 34.17 | 289 | 34.17 | 265 |
| 34.18 | 290 | 34.18 | 268 |
| 34.18 | 292 | 34.18 | 269 |
| 34.19 | 294 | 34.19 | 271 |
| 34.20 | 297 | 34.20 | 273 |
| 34.21 | 299 | 34.21 | 275 |
| 34.22 | 301 | 34.22 | 276 |
| 34.23 | 303 | 34.23 | 278 |
| 34.23 | 305 | 34.23 | 280 |
| 34.24 | 307 | 34.24 | 282 |
| 34.25 | 310 | 34.25 | 284 |
| 34.26 | 312 | 34.26 | 286 |
| 34.27 | 314 | 34.27 | 287 |
| 34.28 | 316 | 34.28 | 290 |
| 34.28 | 317 | 34.28 | 292 |
| 34.29 | 319 | 34.29 | 295 |
| 34.30 | 320 | 34.30 | 297 |
| 34.31 | 322 | 34.31 | 298 |
| 34.32 | 323 | 34.32 | 300 |
| 34.33 | 325 | 34.33 | 302 |
| 34.33 | 327 | 34.33 | 304 |

|       |     |       |     |
|-------|-----|-------|-----|
| 34.34 | 328 | 34.34 | 306 |
| 34.35 | 330 | 34.35 | 307 |
| 34.36 | 331 | 34.36 | 308 |
| 34.37 | 332 | 34.37 | 309 |
| 34.38 | 334 | 34.38 | 309 |
| 34.38 | 336 | 34.38 | 310 |
| 34.39 | 337 | 34.39 | 311 |
| 34.40 | 338 | 34.40 | 312 |
| 34.41 | 340 | 34.41 | 313 |
| 34.42 | 341 | 34.42 | 315 |
| 34.43 | 342 | 34.43 | 316 |
| 34.43 | 343 | 34.43 | 317 |
| 34.44 | 345 | 34.44 | 317 |
| 34.45 | 347 | 34.45 | 318 |
| 34.46 | 348 | 34.46 | 318 |
| 34.47 | 349 | 34.47 | 319 |
| 34.48 | 350 | 34.48 | 321 |
| 34.48 | 351 | 34.48 | 322 |
| 34.49 | 352 | 34.49 | 324 |
| 34.50 | 354 | 34.50 | 325 |
| 34.51 | 356 | 34.51 | 327 |
| 34.52 | 357 | 34.52 | 328 |
| 34.53 | 358 | 34.53 | 329 |
| 34.53 | 359 | 34.53 | 330 |
| 34.54 | 360 | 34.54 | 331 |
| 34.55 | 361 | 34.55 | 332 |
| 34.56 | 362 | 34.56 | 334 |
| 34.57 | 363 | 34.57 | 334 |
| 34.58 | 363 | 34.58 | 335 |
| 34.58 | 364 | 34.58 | 336 |
| 34.59 | 365 | 34.59 | 337 |
| 34.60 | 366 | 34.60 | 339 |
| 34.61 | 366 | 34.61 | 340 |
| 34.62 | 367 | 34.62 | 341 |
| 34.63 | 368 | 34.63 | 342 |
| 34.63 | 369 | 34.63 | 343 |
| 34.64 | 370 | 34.64 | 343 |
| 34.65 | 371 | 34.65 | 344 |
| 34.66 | 372 | 34.66 | 345 |
| 34.67 | 373 | 34.67 | 346 |
| 34.68 | 373 | 34.68 | 346 |
| 34.68 | 373 | 34.68 | 347 |
| 34.69 | 374 | 34.69 | 348 |

|       |     |       |     |
|-------|-----|-------|-----|
| 34.70 | 374 | 34.70 | 350 |
| 34.71 | 375 | 34.71 | 351 |
| 34.72 | 376 | 34.72 | 352 |
| 34.73 | 377 | 34.73 | 353 |
| 34.73 | 377 | 34.73 | 354 |
| 34.74 | 378 | 34.74 | 356 |
| 34.75 | 379 | 34.75 | 356 |
| 34.76 | 380 | 34.76 | 357 |
| 34.77 | 381 | 34.77 | 358 |
| 34.78 | 382 | 34.78 | 358 |
| 34.78 | 382 | 34.78 | 359 |
| 34.79 | 383 | 34.79 | 359 |
| 34.80 | 384 | 34.80 | 360 |
| 34.81 | 384 | 34.81 | 361 |
| 34.82 | 385 | 34.82 | 361 |
| 34.83 | 385 | 34.83 | 362 |
| 34.83 | 386 | 34.83 | 363 |
| 34.84 | 387 | 34.84 | 363 |
| 34.85 | 388 | 34.85 | 364 |
| 34.86 | 388 | 34.86 | 364 |
| 34.87 | 389 | 34.87 | 365 |
| 34.88 | 390 | 34.88 | 366 |
| 34.88 | 390 | 34.88 | 366 |
| 34.89 | 390 | 34.89 | 366 |
| 34.90 | 391 | 34.90 | 367 |
| 34.91 | 392 | 34.91 | 367 |
| 34.92 | 393 | 34.92 | 368 |
| 34.93 | 394 | 34.93 | 368 |
| 34.93 | 394 | 34.93 | 369 |
| 34.94 | 395 | 34.94 | 369 |
| 34.95 | 395 | 34.95 | 369 |
| 34.96 | 395 | 34.96 | 369 |
| 34.97 | 395 | 34.97 | 369 |
| 34.98 | 395 | 34.98 | 369 |
| 34.98 | 396 | 34.98 | 370 |
| 34.99 | 397 | 34.99 | 371 |
| 35.00 | 398 | 35.00 | 372 |

Table S4. Experimental data for Figure 3.



| $\Delta\text{TMP}/\Delta t$ (mbar/min) |         |         |         |         |         |         |         |         |         |          |
|----------------------------------------|---------|---------|---------|---------|---------|---------|---------|---------|---------|----------|
| Ster. 0                                | Ster. 1 | Ster. 2 | Ster. 3 | Ster. 4 | Ster. 5 | Ster. 6 | Ster. 7 | Ster. 8 | Ster. 9 | Ster. 10 |
| -11.568                                | -7.243  | -4.012  | -6.566  | -8.754  | -4.963  | -4.299  | -5.002  | -10.630 | -3.635  | -5.940   |
| -10.005                                | -6.462  | -1.837  | -5.003  | -6.722  | -3.088  | -3.752  | -2.423  | -2.501  | -2.579  | -1.368   |
| -9.797                                 | -5.784  | -1.798  | -1.290  | -4.377  | -3.087  | -2.619  | -1.876  | -2.423  | -2.501  | -1.290   |
| -9.692                                 | -4.898  | -1.251  | -1.251  | -4.338  | -2.501  | -1.876  | -1.876  | -2.345  | -2.501  | -1.212   |
| -9.015                                 | -4.117  | -1.251  | -1.251  | -4.260  | -2.423  | -1.876  | -1.876  | -1.876  | -1.915  | -0.743   |
| -8.963                                 | -4.012  | -1.172  | -1.251  | -3.713  | -2.423  | -1.837  | -1.759  | -1.251  | -1.876  | -0.664   |
| -8.233                                 | -3.335  | -1.133  | -1.172  | -3.713  | -2.345  | -1.837  | -1.212  | -1.251  | -1.876  | -0.664   |
| -8.233                                 | -3.283  | -0.664  | -0.625  | -3.127  | -2.306  | -1.798  | -1.172  | -1.212  | -1.837  | -0.664   |
| -8.181                                 | -3.283  | -0.625  | -0.625  | -3.087  | -0.664  | -1.251  | -0.625  | -1.172  | -1.837  | -0.664   |
| -8.077                                 | -3.231  | -0.625  | -0.625  | -3.048  | -0.664  | -1.251  | -0.625  | -1.172  | -1.798  | -0.625   |
| -8.077                                 | -2.553  | -0.625  | -0.625  | -2.970  | -0.625  | -0.782  | -0.586  | -0.664  | -1.798  | -0.625   |
| -7.973                                 | -2.501  | -0.625  | -0.586  | -2.540  | -0.625  | -0.703  | -0.547  | -0.625  | -1.798  | -0.625   |
| -7.504                                 | -2.501  | -0.586  | -0.078  | -2.501  | -0.625  | -0.625  | -0.508  | -0.625  | -1.329  | -0.547   |
| -7.295                                 | -2.501  | -0.586  | -0.078  | -2.501  | -0.625  | -0.625  | -0.039  | -0.625  | -1.329  | -0.039   |
| -7.191                                 | -2.449  | -0.078  | 0.000   | -2.462  | -0.625  | -0.625  | -0.039  | -0.625  | -1.290  | -0.039   |
| -6.618                                 | -2.293  | -0.078  | 0.000   | -2.462  | -0.117  | -0.625  | 0.000   | -0.586  | -1.212  | -0.039   |
| -6.462                                 | -1.668  | -0.074  | 0.000   | -2.423  | -0.117  | -0.586  | 0.000   | -0.547  | -0.782  | -0.039   |
| -6.409                                 | -1.667  | -0.039  | 0.000   | -2.384  | -0.039  | -0.586  | 0.000   | -0.078  | -0.703  | 0.039    |
| -5.862                                 | -1.615  | -0.039  | 0.000   | -2.384  | -0.039  | -0.508  | 0.000   | -0.078  | -0.703  | 0.039    |
| -5.680                                 | -1.563  | 0.000   | 0.000   | -2.384  | 0.000   | -0.117  | 0.000   | -0.039  | -0.664  | 0.039    |
| -5.002                                 | -1.511  | 0.000   | 0.078   | -1.212  | 0.000   | -0.039  | 0.000   | -0.039  | -0.664  | 0.039    |
| -4.898                                 | -1.459  | 0.000   | 0.078   | -0.664  | 0.000   | -0.039  | 0.000   | 0.000   | -0.625  | 0.078    |
| -4.846                                 | -0.938  | 0.039   | 0.078   | -0.625  | 0.625   | -0.039  | 0.039   | 0.000   | -0.625  | 0.078    |
| -4.794                                 | -0.938  | 0.039   | 0.625   | -0.078  |         | -0.039  | 0.039   | 0.000   | -0.039  | 0.547    |
| -4.117                                 | -0.834  | 0.117   | 0.625   |         |         | 0.000   | 0.078   | 0.000   | 0.000   | 0.625    |
| -4.064                                 | -0.782  |         | 0.625   |         |         | 0.000   | 0.117   | 0.039   | 0.000   | 1.172    |
| -3.596                                 | -0.104  |         |         |         |         | 0.000   | 0.508   | 0.039   | 0.000   |          |
| -2.501                                 |         |         |         |         |         | 0.039   | 1.094   | 0.039   | 0.000   |          |
|                                        |         |         |         |         |         |         |         | 0.039   | 0.000   |          |
|                                        |         |         |         |         |         |         |         | 0.625   | 0.039   |          |
|                                        |         |         |         |         |         |         |         | 1.329   | 0.039   |          |
|                                        |         |         |         |         |         |         |         | 1.368   |         |          |

Table S5. Experimental data for Figure 4.

| (a)           |               |               |               |               |               | (b)           |               |               |               |               |               |
|---------------|---------------|---------------|---------------|---------------|---------------|---------------|---------------|---------------|---------------|---------------|---------------|
| Ster. 0       |               | Ster. 5       |               | Ster. 10      |               | Ster. 0       |               | Ster. 5       |               | Ster. 10      |               |
| TMP<br>(mbar) | Time<br>(min) |
| 0.00          | 0.00          | 0.00          | 0.00          | 0.00          | 0.00          | 0.00          | 0.00          | 0.00          | 0.00          | 0.00          | 0.00          |
| 0.63          | 0.17          | 0.63          | 0.17          | -6.25         | 0.00          | 0.63          | 0.18          | 0.00          | 0.17          | -1.88         | 0.25          |
| -0.63         | 0.47          | 0.00          | 0.35          | -6.25         | 0.25          | -15.01        | 0.35          | -13.13        | 0.35          | -15.01        | 0.52          |
| -6.88         | 0.65          | -4.38         | 0.52          | -6.25         | 0.50          | -18.76        | 0.52          | -13.13        | 0.52          | -14.38        | 0.77          |
| -11.88        | 0.82          | -8.75         | 0.70          | -7.50         | 0.77          | -18.76        | 0.70          | -13.76        | 0.68          | -15.01        | 1.02          |
| -12.51        | 0.98          | -7.50         | 0.87          | -6.25         | 1.02          | -18.13        | 0.87          | -13.76        | 0.87          | -15.01        | 1.27          |
| -11.88        | 1.17          | -7.50         | 1.03          | -8.13         | 1.27          | -18.76        | 1.03          | -13.13        | 1.03          | -15.01        | 1.53          |
| -11.88        | 1.33          | -8.75         | 1.20          | -8.13         | 1.53          | -18.76        | 1.22          | -13.13        | 1.20          | -15.01        | 1.78          |
| -11.88        | 1.50          | -8.75         | 1.38          | -7.50         | 1.78          | -18.76        | 1.38          | -13.76        | 1.37          | -14.38        | 2.03          |
| -12.51        | 1.68          | -9.38         | 1.55          | -8.13         | 2.03          | -18.76        | 1.55          | -13.76        | 1.55          | -15.01        | 2.30          |
| -12.51        | 1.85          | -8.75         | 1.73          | -8.13         | 2.30          | -18.76        | 1.72          | -13.76        | 1.72          | -15.01        | 2.55          |
| -12.51        | 2.02          | -7.50         | 1.90          | -7.50         | 2.55          | -18.13        | 1.92          | -13.76        | 1.88          | -15.63        | 2.80          |
| -12.51        | 2.18          | -9.38         | 2.07          | -8.75         | 2.82          | -18.76        | 2.08          | -13.76        | 2.07          | -15.01        | 3.07          |
| -12.51        | 2.37          | -8.75         | 2.23          | -7.50         | 3.07          | -18.76        | 2.25          | -13.76        | 2.23          | -15.01        | 3.32          |
| -11.88        | 2.53          | -9.38         | 2.42          | -8.13         | 3.32          | -18.76        | 2.43          | -15.01        | 2.40          | -15.01        | 3.58          |
| -12.51        | 2.70          | -7.50         | 2.58          | -8.75         | 3.58          | -18.13        | 2.60          | -15.01        | 2.57          | -15.01        | 3.83          |
| -11.88        | 2.88          | -8.75         | 2.75          | -8.13         | 3.83          | -18.76        | 2.77          | -15.01        | 2.75          | -15.01        | 4.10          |
| -13.13        | 3.05          | -8.75         | 2.93          | -8.13         | 4.10          | -19.38        | 2.95          | -13.76        | 2.92          | -15.01        | 4.35          |
| -12.51        | 3.23          | -7.50         | 3.10          | -8.75         | 4.35          | -18.76        | 3.12          | -13.76        | 3.08          | -15.01        | 4.60          |
| -13.13        | 3.42          | -9.38         | 3.27          | -8.13         | 4.60          | -19.38        | 3.28          | -13.76        | 3.27          | -15.01        | 4.85          |
| -12.51        | 3.58          | -8.75         | 3.45          | -8.75         | 4.87          | -19.38        | 3.45          | -13.76        | 3.43          | -15.63        | 5.12          |

|        |      |        |      |       |       |        |      |        |      |        |       |
|--------|------|--------|------|-------|-------|--------|------|--------|------|--------|-------|
| -12.51 | 3.77 | -8.75  | 3.62 | -8.75 | 5.12  | -18.76 | 3.63 | -13.76 | 3.60 | -15.01 | 5.37  |
| -13.13 | 3.93 | -9.38  | 3.78 | -8.75 | 5.37  | -18.76 | 3.80 | -13.76 | 3.78 | -15.01 | 5.62  |
| -12.51 | 4.12 | -9.38  | 3.95 | -8.75 | 5.63  | -18.76 | 3.97 | -13.76 | 3.95 | -15.01 | 5.88  |
| -13.13 | 4.28 | -9.38  | 4.13 | -7.50 | 5.88  | -18.76 | 4.15 | -15.01 | 4.12 | -15.01 | 6.13  |
| -13.13 | 4.47 | -9.38  | 4.30 | -8.13 | 6.13  | -18.76 | 4.32 | -15.01 | 4.30 | -15.01 | 6.38  |
| -13.13 | 4.63 | -10.01 | 4.47 | -8.75 | 6.40  | -18.76 | 4.48 | -13.76 | 4.47 | -15.01 | 6.65  |
| -13.13 | 4.82 | -9.38  | 4.65 | -8.13 | 6.65  | -18.76 | 4.65 | -15.01 | 4.63 | -15.63 | 6.90  |
| -12.51 | 4.98 | -8.75  | 4.82 | -8.75 | 6.92  | -18.76 | 4.83 | -13.76 | 4.80 | -15.63 | 7.15  |
| -12.51 | 5.17 | -9.38  | 4.98 | -8.13 | 7.17  | -19.38 | 5.00 | -15.01 | 4.98 | -15.63 | 7.42  |
| -13.13 | 5.33 | -9.38  | 5.17 | -8.75 | 7.42  | -18.76 | 5.18 | -13.76 | 5.15 | -15.01 | 7.67  |
| -13.13 | 5.50 | -9.38  | 5.33 | -8.13 | 7.67  | -18.76 | 5.35 | -13.76 | 5.32 | -15.63 | 7.92  |
| -12.51 | 5.68 | -9.38  | 5.50 | -8.75 | 7.93  | -18.76 | 5.52 | -13.76 | 5.50 | -15.63 | 8.18  |
| -12.51 | 5.85 | -9.38  | 5.68 | -8.13 | 8.18  | -18.76 | 5.70 | -13.76 | 5.67 | -9.38  | 8.43  |
| -12.51 | 6.03 | -9.38  | 5.85 | -8.75 | 8.45  | -18.76 | 5.87 | -15.01 | 5.83 | 0.00   | 8.70  |
| -12.51 | 6.20 | -9.38  | 6.03 | -8.75 | 8.70  | -18.76 | 6.03 | -13.76 | 6.02 | 0.63   | 8.95  |
| -13.13 | 6.37 | -9.38  | 6.20 | -8.75 | 8.95  | -18.13 | 6.22 | -15.01 | 6.18 | 0.63   | 9.22  |
| -13.13 | 6.55 | -9.38  | 6.37 | -8.75 | 9.22  | -18.13 | 6.38 | -15.63 | 6.35 | 0.00   | 9.47  |
| -13.13 | 6.72 | -9.38  | 6.55 | -8.13 | 9.47  | -19.38 | 6.55 | -13.76 | 6.53 | 0.63   | 9.72  |
| -12.51 | 6.88 | -10.01 | 6.72 | -8.13 | 9.72  | -18.76 | 6.73 | -13.76 | 6.70 | 0.00   | 9.98  |
| -12.51 | 7.07 | -9.38  | 6.90 | -8.75 | 9.98  | -18.76 | 6.90 | -15.01 | 6.87 | 0.63   | 10.23 |
| -12.51 | 7.25 | -10.01 | 7.07 | -8.75 | 10.23 | -18.76 | 7.07 | -15.01 | 7.05 | 1.25   | 10.50 |
| -13.13 | 7.42 | -10.01 | 7.23 | -8.75 | 10.50 | -18.76 | 7.23 | -13.76 | 7.22 | -1.25  | 10.75 |
| -13.13 | 7.60 | -8.75  | 7.42 | 0.00  | 10.75 | -18.76 | 7.42 | -15.63 | 7.38 | -15.63 | 11.00 |
| -12.51 | 7.77 | -10.01 | 7.58 | 0.00  | 11.00 | -19.38 | 7.58 | -15.63 | 7.57 | -15.01 | 11.27 |
| -12.51 | 7.95 | -9.38  | 7.75 | 0.63  | 11.27 | -18.76 | 7.77 | -15.01 | 7.73 | -15.01 | 11.52 |
| -11.88 | 8.12 | -9.38  | 7.93 | 0.63  | 11.52 | -19.38 | 7.93 | -15.01 | 7.92 | -15.01 | 11.77 |
| -13.13 | 8.30 | -9.38  | 8.10 | 0.63  | 11.77 | -18.76 | 8.10 | -15.01 | 8.08 | -16.88 | 12.03 |
| -13.13 | 8.48 | -8.75  | 8.28 | 0.63  | 12.02 | -18.76 | 8.28 | -13.76 | 8.25 | -15.63 | 12.28 |
| -12.51 | 8.65 | -8.75  | 8.45 | 0.63  | 12.28 | -3.75  | 8.45 | -15.01 | 8.42 | -15.63 | 12.53 |

|        |       |        |       |       |       |        |       |        |       |        |       |
|--------|-------|--------|-------|-------|-------|--------|-------|--------|-------|--------|-------|
| -13.13 | 8.82  | -9.38  | 8.62  | 0.00  | 12.53 | 0.63   | 8.63  | -0.63  | 8.60  | -15.63 | 12.80 |
| -13.13 | 9.00  | -10.01 | 8.80  | 0.00  | 12.78 | 0.63   | 8.80  | 0.00   | 8.77  | -15.63 | 13.05 |
| -13.13 | 9.17  | -10.01 | 8.97  | 0.00  | 13.03 | 0.00   | 8.97  | 0.00   | 8.93  | -15.63 | 13.30 |
| -12.51 | 9.33  | -9.38  | 9.13  | 0.63  | 13.30 | 0.63   | 9.15  | 0.00   | 9.13  | -15.01 | 13.57 |
| -13.13 | 9.52  | -8.75  | 9.30  | -8.75 | 13.55 | 0.00   | 9.32  | 0.00   | 9.30  | -15.01 | 13.82 |
| -13.13 | 9.68  | -9.38  | 9.48  | -8.75 | 13.80 | 0.00   | 9.48  | 0.00   | 9.47  | -15.63 | 14.07 |
| -13.13 | 9.85  | -10.01 | 9.65  | -8.75 | 14.07 | 0.63   | 9.67  | 0.00   | 9.65  | -15.63 | 14.32 |
| -13.13 | 10.03 | -9.38  | 9.82  | -8.13 | 14.32 | 0.00   | 9.83  | 0.63   | 9.82  | -15.63 | 14.58 |
| -12.51 | 10.22 | -9.38  | 10.00 | -8.13 | 14.57 | 0.63   | 10.00 | 0.63   | 9.98  | -15.63 | 14.83 |
| -3.75  | 10.38 | -9.38  | 10.17 | -8.75 | 14.83 | 0.00   | 10.18 | -0.63  | 10.15 | -15.63 | 15.08 |
| -0.63  | 10.55 | -9.38  | 10.33 | -8.75 | 15.08 | 0.63   | 10.35 | 0.00   | 10.33 | -15.63 | 15.35 |
| 0.00   | 10.73 | -4.38  | 10.52 | -9.38 | 15.33 | 0.00   | 10.53 | 0.00   | 10.50 | -16.88 | 15.60 |
| -0.63  | 10.90 | -0.63  | 10.68 | -8.13 | 15.58 | 0.63   | 10.70 | -0.63  | 10.68 | -16.88 | 15.85 |
| 0.00   | 11.07 | -0.63  | 10.85 | -8.13 | 15.85 | 0.00   | 10.87 | -9.38  | 10.87 | -16.88 | 16.12 |
| 0.00   | 11.25 | 0.00   | 11.03 | -8.75 | 16.10 | -15.63 | 11.03 | -13.76 | 11.03 | -16.88 | 16.37 |
| -0.63  | 11.42 | 0.00   | 11.20 | -8.75 | 16.35 | -18.13 | 11.22 | -15.63 | 11.22 | -15.63 | 16.62 |
| -0.63  | 11.58 | 0.00   | 11.37 | -8.75 | 16.60 | -18.76 | 11.38 | -13.76 | 11.38 | -15.63 | 16.88 |
| -0.63  | 11.77 | 0.63   | 11.53 | -8.13 | 16.85 | -18.76 | 11.55 | -15.01 | 11.55 | -15.63 | 17.13 |
| 0.00   | 11.93 | 0.00   | 11.72 | -8.13 | 17.12 | -18.76 | 11.73 | -13.76 | 11.73 | -16.88 | 17.38 |
| -0.63  | 12.10 | 0.00   | 11.88 | -8.75 | 17.37 | -18.76 | 11.90 | -15.01 | 11.90 | -15.63 | 17.63 |
| 0.00   | 12.27 | 0.00   | 12.05 | -8.75 | 17.63 | -18.13 | 12.07 | -15.01 | 12.07 | -16.88 | 17.90 |
| 0.00   | 12.45 | 0.00   | 12.22 | -8.75 | 17.88 | -18.76 | 12.25 | -15.01 | 12.25 | -16.88 | 18.15 |
| -0.63  | 12.63 | -0.63  | 12.40 | -8.75 | 18.13 | -18.76 | 12.42 | -15.01 | 12.42 | -16.88 | 18.40 |
| -11.88 | 12.82 | -0.63  | 12.57 | -8.75 | 18.40 | -19.38 | 12.60 | -15.01 | 12.58 | -16.88 | 18.65 |
| -13.13 | 12.98 | -0.63  | 12.75 | -9.38 | 18.65 | -18.76 | 12.77 | -13.76 | 12.77 | -11.88 | 18.92 |
| -13.13 | 13.17 | -8.75  | 12.92 | -9.38 | 18.90 | -18.76 | 12.93 | -15.63 | 12.93 | 0.00   | 19.17 |
| -13.13 | 13.33 | -8.75  | 13.08 | -8.13 | 19.17 | -18.76 | 13.12 | -15.63 | 13.10 | 0.63   | 19.42 |
| -13.13 | 13.50 | -9.38  | 13.27 | -9.38 | 19.42 | -18.76 | 13.28 | -15.01 | 13.27 | 0.63   | 19.68 |
| -12.51 | 13.68 | -9.38  | 13.43 | -9.38 | 19.67 | -18.76 | 13.45 | -15.63 | 13.45 | 0.63   | 19.93 |

|        |       |        |       |        |       |        |       |        |       |        |       |
|--------|-------|--------|-------|--------|-------|--------|-------|--------|-------|--------|-------|
| -13.13 | 13.85 | -9.38  | 13.62 | -8.75  | 19.93 | -18.76 | 13.63 | -15.01 | 13.62 | 0.00   | 20.20 |
| -13.13 | 14.03 | -8.75  | 13.78 | -8.75  | 20.18 | -18.76 | 13.80 | -15.01 | 13.80 | 0.00   | 20.45 |
| -12.51 | 14.20 | -10.01 | 13.95 | -8.75  | 20.43 | -19.38 | 13.97 | -15.01 | 13.97 | 0.63   | 20.70 |
| -13.13 | 14.37 | -9.38  | 14.13 | -8.75  | 20.70 | -18.76 | 14.15 | -15.63 | 14.13 | 0.63   | 20.97 |
| -13.13 | 14.53 | -10.01 | 14.30 | -8.75  | 20.95 | -18.76 | 14.32 | -15.01 | 14.32 | -3.13  | 21.22 |
| -13.13 | 14.72 | -9.38  | 14.47 | -8.75  | 21.20 | -18.76 | 14.48 | -15.63 | 14.48 | -15.63 | 21.47 |
| -13.13 | 14.88 | -9.38  | 14.65 | -3.13  | 21.45 | -18.76 | 14.67 | -15.01 | 14.65 | -16.88 | 21.72 |
| -13.13 | 15.05 | -9.38  | 14.82 | 0.63   | 21.72 | -18.76 | 14.83 | -15.63 | 14.83 | -15.63 | 21.98 |
| -13.13 | 15.23 | -10.01 | 14.98 | 0.63   | 21.97 | -18.76 | 15.00 | -15.01 | 15.00 | -16.88 | 22.23 |
| -13.13 | 15.40 | -8.75  | 15.17 | 0.63   | 22.23 | -18.76 | 15.17 | -15.01 | 15.17 | -16.88 | 22.48 |
| -13.13 | 15.57 | -8.75  | 15.33 | 0.63   | 22.48 | -18.76 | 15.35 | -15.63 | 15.35 | -16.88 | 22.75 |
| -13.13 | 15.75 | -10.01 | 15.50 | 0.63   | 22.73 | -18.76 | 15.52 | -15.63 | 15.52 | -15.63 | 23.00 |
| -12.51 | 15.92 | -8.75  | 15.68 | 0.63   | 23.00 | -18.76 | 15.68 | -15.63 | 15.68 | -16.88 | 23.25 |
| -12.51 | 16.08 | -10.01 | 15.85 | 0.63   | 23.25 | -18.76 | 15.87 | -15.63 | 15.87 | -15.63 | 23.52 |
| -13.13 | 16.27 | -9.38  | 16.03 | -5.00  | 23.50 | -18.76 | 16.03 | -15.63 | 16.03 | -15.63 | 23.77 |
| -12.51 | 16.43 | -9.38  | 16.20 | -9.38  | 23.77 | -19.38 | 16.20 | -15.63 | 16.20 | -17.51 | 24.03 |
| -13.13 | 16.60 | -8.75  | 16.37 | -9.38  | 24.02 | -19.38 | 16.38 | -15.01 | 16.38 | -16.88 | 24.28 |
| -13.13 | 16.78 | -10.01 | 16.55 | -9.38  | 24.27 | -18.76 | 16.55 | -15.63 | 16.55 | -16.88 | 24.53 |
| -12.51 | 16.95 | -10.01 | 16.72 | -8.75  | 24.53 | -18.76 | 16.73 | -15.63 | 16.72 | -16.88 | 24.80 |
| -13.13 | 17.12 | -9.38  | 16.88 | -9.38  | 24.78 | -18.76 | 16.90 | -15.01 | 16.90 | -16.88 | 25.05 |
| -13.13 | 17.30 | -10.01 | 17.07 | -9.38  | 25.03 | -19.38 | 17.07 | -15.63 | 17.07 | -16.88 | 25.30 |
| -12.51 | 17.47 | -8.75  | 17.23 | -9.38  | 25.30 | -18.76 | 17.25 | -15.63 | 17.23 | -16.88 | 25.55 |
| -13.13 | 17.63 | -9.38  | 17.40 | -9.38  | 25.55 | -19.38 | 17.42 | -15.63 | 17.42 | -16.88 | 25.82 |
| -13.13 | 17.82 | -9.38  | 17.57 | -9.38  | 25.80 | -18.76 | 17.58 | -13.76 | 17.58 | -17.51 | 26.07 |
| -13.13 | 17.98 | -10.01 | 17.75 | -8.75  | 26.05 | -19.38 | 17.75 | -15.63 | 17.75 | -17.51 | 26.33 |
| -13.13 | 18.15 | -10.01 | 17.92 | -9.38  | 26.32 | -18.76 | 17.93 | -15.63 | 17.93 | -16.88 | 26.58 |
| -13.13 | 18.33 | -10.01 | 18.08 | -9.38  | 26.57 | -18.76 | 18.10 | -15.01 | 18.10 | -17.51 | 26.83 |
| -12.51 | 18.50 | -9.38  | 18.27 | -9.38  | 26.82 | -19.38 | 18.28 | -15.01 | 18.27 | -17.51 | 27.08 |
| -13.13 | 18.67 | -10.01 | 18.43 | -10.63 | 27.08 | -18.76 | 18.45 | -15.63 | 18.45 | -18.13 | 27.35 |

|        |       |        |       |        |       |        |       |        |       |        |       |
|--------|-------|--------|-------|--------|-------|--------|-------|--------|-------|--------|-------|
| -13.13 | 18.85 | -9.38  | 18.60 | -10.63 | 27.33 | -18.76 | 18.62 | -15.63 | 18.62 | -18.13 | 27.60 |
| -13.76 | 19.02 | -10.01 | 18.77 | -9.38  | 27.58 | -19.38 | 18.80 | -3.13  | 18.78 | -18.13 | 27.85 |
| -13.13 | 19.18 | -9.38  | 18.95 | -10.63 | 27.83 | -19.38 | 18.97 | 0.63   | 18.97 | -18.13 | 28.12 |
| -13.13 | 19.35 | -10.01 | 19.12 | -9.38  | 28.10 | -14.38 | 19.15 | 0.00   | 19.13 | -16.88 | 28.37 |
| -12.51 | 19.53 | -10.01 | 19.28 | -9.38  | 28.35 | -1.88  | 19.32 | 0.63   | 19.30 | -18.13 | 28.62 |
| -13.13 | 19.70 | -10.01 | 19.47 | -10.63 | 28.62 | 0.00   | 19.48 | 0.63   | 19.47 | -18.13 | 28.88 |
| -13.13 | 19.88 | -9.38  | 19.63 | -10.63 | 28.87 | 0.63   | 19.67 | -0.63  | 19.65 | -17.51 | 29.13 |
| -13.13 | 20.05 | -9.38  | 19.80 | -9.38  | 29.12 | 0.63   | 19.83 | 0.63   | 19.82 | -1.25  | 29.40 |
| -13.76 | 20.22 | -9.38  | 19.98 | -8.75  | 29.38 | 0.63   | 20.02 | -0.63  | 19.98 | 0.63   | 29.65 |
| -13.13 | 20.40 | -10.01 | 20.15 | -9.38  | 29.63 | 0.63   | 20.18 | 0.00   | 20.15 | 0.00   | 29.90 |
| -13.13 | 20.57 | -9.38  | 20.32 | -10.63 | 29.88 | 0.00   | 20.35 | 0.00   | 20.33 | 0.00   | 30.17 |
| -13.13 | 20.73 | -9.38  | 20.48 | -9.38  | 30.13 | 0.63   | 20.53 | 0.00   | 20.50 | 0.63   | 30.42 |
| -3.75  | 20.92 | -9.38  | 20.67 | -9.38  | 30.40 | 0.63   | 20.70 | 0.00   | 20.67 | 0.63   | 30.67 |
| -1.25  | 21.08 | -10.01 | 20.83 | -9.38  | 30.65 | 0.63   | 20.87 | 0.00   | 20.85 | 0.63   | 30.93 |
| 0.00   | 21.25 | -9.38  | 21.02 | -9.38  | 30.90 | 0.00   | 21.05 | 0.63   | 21.02 | 0.00   | 31.18 |
| 0.00   | 21.43 | -2.50  | 21.20 | -10.63 | 31.17 | 0.00   | 21.22 | 0.63   | 21.18 | 0.00   | 31.43 |
| 0.00   | 21.60 | 0.00   | 21.37 | -9.38  | 31.42 | 0.63   | 21.38 | -13.13 | 21.35 | 0.63   | 31.70 |
| 0.00   | 21.77 | 0.00   | 21.55 | -9.38  | 31.67 | -10.00 | 21.57 | -15.01 | 21.53 | 0.00   | 31.95 |
| 0.00   | 21.95 | -0.63  | 21.72 | 0.00   | 31.93 | -18.76 | 21.73 | -15.63 | 21.70 | -15.63 | 32.20 |
| -0.63  | 22.12 | 0.00   | 21.90 | 0.63   | 32.18 | -18.76 | 21.92 | -15.01 | 21.88 | -16.88 | 32.47 |
| 0.00   | 22.30 | 0.00   | 22.07 | 0.63   | 32.43 | -19.38 | 22.08 | -15.01 | 22.05 | -16.88 | 32.72 |
| 0.00   | 22.47 | 0.00   | 22.25 | 0.00   | 32.70 | -19.38 | 22.25 | -15.01 | 22.22 | -16.88 | 32.97 |
| -0.63  | 22.63 | 0.00   | 22.42 | 0.63   | 32.95 | -19.38 | 22.43 | -15.63 | 22.40 | -17.51 | 33.23 |
| 0.00   | 22.82 | 0.63   | 22.60 | 0.63   | 33.20 | -18.76 | 22.60 | -15.01 | 22.57 | -16.88 | 33.48 |
| -0.63  | 22.98 | 0.63   | 22.77 | 0.63   | 33.47 | -18.76 | 22.77 | -15.01 | 22.73 | -17.51 | 33.75 |
| 0.00   | 23.15 | 0.00   | 22.95 | 0.00   | 33.72 | -18.76 | 22.95 | -15.01 | 22.92 | -18.13 | 34.00 |
| -11.88 | 23.33 | 0.00   | 23.12 | -7.50  | 33.98 | -18.76 | 23.12 | -15.01 | 23.08 | -16.88 | 34.25 |
| -13.13 | 23.50 | 0.00   | 23.28 | -9.38  | 34.23 | -18.76 | 23.28 | -15.01 | 23.25 | -18.13 | 34.52 |
| -13.76 | 23.67 | -3.75  | 23.47 | -9.38  | 34.48 | -19.38 | 23.47 | -15.63 | 23.43 | -18.13 | 34.77 |

|        |       |        |       |        |       |        |       |        |       |        |       |
|--------|-------|--------|-------|--------|-------|--------|-------|--------|-------|--------|-------|
| -13.13 | 23.85 | -9.38  | 23.63 | -9.38  | 34.75 | -18.76 | 23.63 | -15.01 | 23.60 | -17.51 | 35.03 |
| -13.76 | 24.02 | -9.38  | 23.80 | -9.38  | 35.00 | -18.76 | 23.80 | -15.63 | 23.77 | -17.51 | 35.28 |
| -13.13 | 24.18 | -10.01 | 23.98 | -9.38  | 35.25 | -18.76 | 23.97 | -15.63 | 23.95 | -18.13 | 35.53 |
| -13.13 | 24.37 | -8.75  | 24.15 | -8.75  | 35.52 | -19.38 | 24.15 | -15.63 | 24.12 | -17.51 | 35.80 |
| -13.76 | 24.53 | -9.38  | 24.32 | -9.38  | 35.77 | -18.76 | 24.32 | -15.63 | 24.28 | -18.13 | 36.05 |
| -13.13 | 24.70 | -9.38  | 24.50 | -9.38  | 36.02 | -19.38 | 24.48 | -15.01 | 24.47 | -17.51 | 36.30 |
| -13.76 | 24.88 | -9.38  | 24.67 | -9.38  | 36.28 | -18.76 | 24.65 | -15.63 | 24.63 | -17.51 | 36.55 |
| -13.76 | 25.05 | -9.38  | 24.83 | -9.38  | 36.53 | -19.38 | 24.83 | -15.63 | 24.80 | -18.13 | 36.82 |
| -13.13 | 25.23 | -9.38  | 25.00 | -9.38  | 36.78 | -18.76 | 25.00 | -15.01 | 24.98 | -17.51 | 37.07 |
| -13.13 | 25.40 | -9.38  | 25.18 | -9.38  | 37.05 | -18.76 | 25.17 | -15.63 | 25.15 | -18.13 | 37.33 |
| -13.13 | 25.57 | -9.38  | 25.35 | -9.38  | 37.30 | -18.76 | 25.35 | -15.63 | 25.32 | -18.13 | 37.58 |
| -13.13 | 25.75 | -9.38  | 25.53 | -10.63 | 37.60 | -19.38 | 25.52 | -15.63 | 25.50 | -18.13 | 37.85 |
| -13.13 | 25.92 | -9.38  | 25.70 | -10.63 | 37.87 | -19.38 | 25.68 | -15.01 | 25.67 | -17.51 | 38.10 |
| -13.76 | 26.10 | -10.01 | 25.88 | -9.38  | 38.13 | -19.38 | 25.87 | -15.63 | 25.83 | -18.13 | 38.35 |
| -13.13 | 26.27 | -10.01 | 26.05 | -10.63 | 38.38 | -18.76 | 26.03 | -15.63 | 26.02 | -18.13 | 38.62 |
| -13.13 | 26.43 | -9.38  | 26.22 | -9.38  | 38.63 | -18.76 | 26.20 | -15.01 | 26.18 | -18.76 | 38.87 |
| -12.51 | 26.62 | -10.01 | 26.40 | -8.75  | 38.88 | -19.38 | 26.38 | -15.01 | 26.35 | -18.13 | 39.12 |
| -13.13 | 26.78 | -9.38  | 26.57 | -9.38  | 39.15 | -18.76 | 26.55 | -15.01 | 26.52 | -18.13 | 39.38 |
| -13.13 | 26.95 | -9.38  | 26.73 | -9.38  | 39.40 | -19.38 | 26.72 | -15.63 | 26.70 | -18.76 | 39.63 |
| -13.13 | 27.12 | -10.01 | 26.92 | -9.38  | 39.65 | -18.76 | 26.90 | -16.26 | 26.87 | -18.13 | 39.88 |
| -13.13 | 27.30 | -10.01 | 27.08 | -9.38  | 39.92 | -19.38 | 27.07 | -16.26 | 27.03 | -18.13 | 40.15 |
| -13.13 | 27.47 | -10.01 | 27.25 | -10.63 | 40.17 | -19.38 | 27.25 | -15.01 | 27.20 | -1.25  | 40.40 |
| -13.13 | 27.65 | -9.38  | 27.43 | -10.63 | 40.42 | -18.76 | 27.42 | -16.26 | 27.38 | 0.00   | 40.65 |
| -13.13 | 27.82 | -10.01 | 27.60 | -10.63 | 40.67 | -19.38 | 27.58 | -16.26 | 27.55 | 0.00   | 40.90 |
| -13.13 | 27.98 | -9.38  | 27.77 | -9.38  | 40.93 | -19.38 | 27.75 | -16.26 | 27.72 | 0.63   | 41.17 |
| -13.13 | 28.15 | -9.38  | 27.93 | -10.63 | 41.18 | -19.38 | 27.93 | -15.63 | 27.88 | 0.00   | 41.42 |
| -13.13 | 28.33 | -9.38  | 28.12 | -9.38  | 41.45 | -19.38 | 28.10 | -16.26 | 28.07 | 0.63   | 41.67 |
| -13.13 | 28.52 | -9.38  | 28.28 | -9.38  | 41.70 | -19.38 | 28.28 | -15.63 | 28.23 | 0.63   | 41.93 |
| -13.13 | 28.68 | -10.01 | 28.47 | -9.38  | 41.95 | -18.76 | 28.45 | -15.63 | 28.42 | 0.63   | 42.18 |

|        |       |        |       |       |       |        |       |        |       |       |       |
|--------|-------|--------|-------|-------|-------|--------|-------|--------|-------|-------|-------|
| -13.13 | 28.87 | -9.38  | 28.63 | -3.13 | 42.22 | -18.76 | 28.62 | -15.63 | 28.58 | -3.13 | 42.43 |
| -13.13 | 29.03 | -9.38  | 28.80 | 0.00  | 42.47 | -19.38 | 28.80 | -16.26 | 28.75 |       |       |
| -13.13 | 29.20 | -9.38  | 28.98 |       |       | -18.76 | 28.97 | -15.63 | 28.92 |       |       |
| -13.13 | 29.38 | -10.01 | 29.17 |       |       | -18.76 | 29.13 | -15.63 | 29.10 |       |       |
| -13.13 | 29.55 | -10.01 | 29.33 |       |       | -18.76 | 29.32 | -7.50  | 29.27 |       |       |
| -13.13 | 29.73 | -10.01 | 29.50 |       |       | -18.76 | 29.48 | 0.00   | 29.43 |       |       |
| -13.13 | 29.90 | -9.38  | 29.67 |       |       | -18.76 | 29.65 | -0.63  | 29.60 |       |       |
| -13.13 | 30.08 | -10.01 | 29.85 |       |       | -3.75  | 29.83 | 0.00   | 29.78 |       |       |
| -13.13 | 30.25 | -9.38  | 30.02 |       |       | 0.63   | 30.00 | 0.63   | 29.95 |       |       |
| -13.76 | 30.42 | -10.01 | 30.18 |       |       | 0.63   | 30.17 | 0.00   | 30.12 |       |       |
| -13.13 | 30.60 | -10.01 | 30.37 |       |       | 0.00   | 30.35 | -0.63  | 30.30 |       |       |
| -13.13 | 30.77 | -10.01 | 30.53 |       |       | 0.00   | 30.52 | 0.00   | 30.47 |       |       |
| -13.13 | 30.93 | -8.75  | 30.70 |       |       | 0.63   | 30.68 | 0.00   | 30.63 |       |       |
| -12.51 | 31.12 | -9.38  | 30.87 |       |       | 0.00   | 30.87 | 0.63   | 30.82 |       |       |
| -13.13 | 31.28 | -10.01 | 31.05 |       |       | 0.00   | 31.03 | 0.00   | 30.98 |       |       |
| -6.88  | 31.47 | -10.01 | 31.22 |       |       | 0.00   | 31.22 | 0.00   | 31.15 |       |       |
| -0.63  | 31.63 | -10.01 | 31.38 |       |       | 0.63   | 31.38 | 0.00   | 31.33 |       |       |
| -0.63  | 31.80 | -10.01 | 31.58 |       |       | 0.63   | 31.55 | -13.76 | 31.50 |       |       |
| 0.00   | 31.97 | -1.25  | 31.75 |       |       | 0.63   | 31.73 | -15.01 | 31.67 |       |       |
| -0.63  | 32.15 | 0.00   | 31.93 |       |       | 0.00   | 31.90 | -15.63 | 31.85 |       |       |
| 0.00   | 32.32 | -0.63  | 32.10 |       |       | -13.13 | 32.07 | -15.01 | 32.02 |       |       |
| 0.00   | 32.48 | 0.63   | 32.28 |       |       | -18.76 | 32.25 | -15.63 | 32.20 |       |       |
| -0.63  | 32.67 | 0.00   | 32.45 |       |       | -18.76 | 32.42 | -15.63 | 32.37 |       |       |
| -0.63  | 32.83 | -0.63  | 32.62 |       |       | -19.38 | 32.58 | -15.63 | 32.53 |       |       |
| 0.00   | 33.00 | -0.63  | 32.80 |       |       | -19.38 | 32.77 | -16.26 | 32.72 |       |       |
| 0.00   | 33.18 | 0.63   | 32.97 |       |       | -18.76 | 32.93 | -16.26 | 32.88 |       |       |
| -0.63  | 33.35 | 0.00   | 33.13 |       |       | -19.38 | 33.12 | -16.26 | 33.05 |       |       |
| 0.00   | 33.53 | 0.00   | 33.32 |       |       | -19.38 | 33.28 | -15.63 | 33.23 |       |       |
| -6.88  | 33.70 | 0.00   | 33.48 |       |       | -19.38 | 33.45 | -16.26 | 33.40 |       |       |



|        |       |        |       |        |       |        |       |
|--------|-------|--------|-------|--------|-------|--------|-------|
| -12.51 | 33.87 | 0.00   | 33.67 | -19.38 | 33.63 | -16.26 | 33.58 |
| -13.13 | 34.03 | 0.63   | 33.83 | -19.38 | 33.80 | -16.26 | 33.75 |
| -13.13 | 34.22 | -8.75  | 34.00 | -18.76 | 33.97 | -15.63 | 33.92 |
| -13.13 | 34.38 | -9.38  | 34.18 | -19.38 | 34.13 | -15.63 | 34.08 |
| -13.13 | 34.55 | -9.38  | 34.35 | -19.38 | 34.32 | -15.63 | 34.27 |
| -13.13 | 34.73 | -9.38  | 34.52 | -19.38 | 34.48 | -15.63 | 34.43 |
| -13.13 | 34.90 | -9.38  | 34.70 | -19.38 | 34.65 | -15.63 | 34.60 |
| -13.13 | 35.08 | -10.01 | 34.87 | -19.38 | 34.83 | -15.63 | 34.77 |
| -13.13 | 35.25 | -10.01 | 35.03 | -19.38 | 35.00 | -15.63 | 34.95 |
| -13.13 | 35.43 | -10.01 | 35.22 | -19.38 | 35.17 | -15.63 | 35.12 |
| -13.13 | 35.60 | -9.38  | 35.38 | -19.38 | 35.35 | -16.26 | 35.28 |
| -13.13 | 35.78 | -9.38  | 35.55 | -19.38 | 35.52 | -16.26 | 35.47 |
| -12.51 | 35.95 | -10.01 | 35.73 | -19.38 | 35.68 | -16.26 | 35.63 |
| -13.13 | 36.12 | -9.38  | 35.90 | -18.76 | 35.87 | -15.63 | 35.80 |
| -13.13 | 36.30 | -10.01 | 36.07 | -18.76 | 36.03 | -16.26 | 35.97 |
| -13.13 | 36.47 | -10.01 | 36.23 | -19.38 | 36.20 | -15.63 | 36.15 |
| -13.13 | 36.63 | -9.38  | 36.42 | -18.76 | 36.37 | -16.26 | 36.32 |
| -13.13 | 36.82 | -9.38  | 36.58 | -19.38 | 36.55 | -16.26 | 36.50 |
| -13.13 | 36.98 | -9.38  | 36.77 | -18.76 | 36.72 | -16.26 | 36.67 |
| -13.76 | 37.17 | -8.75  | 36.93 | -19.38 | 36.88 | -15.63 | 36.83 |
| -13.13 | 37.33 | -10.01 | 37.10 | -19.38 | 37.05 | -16.26 | 37.02 |
| -13.13 | 37.50 | -9.38  | 37.27 | -19.38 | 37.23 | -16.26 | 37.18 |
| -13.76 | 37.67 | -10.01 | 37.45 | -19.38 | 37.40 | -16.26 | 37.35 |
| -13.13 | 37.85 | -10.01 | 37.62 | -19.38 | 37.58 | -16.26 | 37.53 |
| -13.13 | 38.02 | -9.38  | 37.78 | -19.38 | 37.75 | -16.88 | 37.70 |
| -13.13 | 38.18 | -9.38  | 37.97 | -18.76 | 37.92 | -16.26 | 37.87 |
| -13.13 | 38.37 | -10.01 | 38.13 | -19.38 | 38.10 | -16.26 | 38.05 |
| -13.76 | 38.53 | -9.38  | 38.30 | -19.38 | 38.27 | -16.26 | 38.22 |
| -13.13 | 38.70 | -9.38  | 38.48 | -19.38 | 38.43 | -16.88 | 38.38 |

|        |       |        |       |        |       |        |       |
|--------|-------|--------|-------|--------|-------|--------|-------|
| -13.13 | 38.88 | -10.01 | 38.65 | -19.38 | 38.62 | -16.26 | 38.57 |
| -13.76 | 39.05 | -9.38  | 38.82 | -19.38 | 38.78 | -16.26 | 38.73 |
| -13.13 | 39.22 | -9.38  | 39.00 | -19.38 | 38.95 | -16.26 | 38.92 |
| -13.13 | 39.40 | -10.01 | 39.17 | -19.38 | 39.13 | -16.88 | 39.08 |
| -13.13 | 39.57 | -10.01 | 39.33 | -18.76 | 39.30 | -16.26 | 39.25 |
| -13.13 | 39.75 | -10.01 | 39.52 | -19.38 | 39.47 | -16.26 | 39.43 |
| -13.13 | 39.92 | -9.38  | 39.68 | -19.38 | 39.65 | -15.63 | 39.62 |
| -13.13 | 40.08 | -8.75  | 39.85 | -19.38 | 39.82 | -1.25  | 39.78 |
| -13.13 | 40.27 | -10.01 | 40.03 | -19.38 | 39.98 | -0.63  | 39.97 |
| -13.13 | 40.43 | -10.01 | 40.20 | -19.38 | 40.17 | 0.00   | 40.13 |
| -13.76 | 40.60 | -10.01 | 40.37 | -6.25  | 40.33 | 0.00   | 40.30 |
| -13.76 | 40.77 | -10.01 | 40.55 | 0.00   | 40.50 |        |       |
| -13.13 | 40.95 | -10.01 | 40.72 |        |       |        |       |
| -13.76 | 41.12 | -10.01 | 40.88 |        |       |        |       |
| -13.13 | 41.28 | -10.01 | 41.07 |        |       |        |       |
| -13.76 | 41.47 | -9.38  | 41.23 |        |       |        |       |
| -13.13 | 41.63 | -9.38  | 41.40 |        |       |        |       |
| -13.13 | 41.80 | -10.01 | 41.57 |        |       |        |       |
| -0.63  | 41.97 | -10.01 | 41.75 |        |       |        |       |
| -0.63  | 42.15 | -9.38  | 41.92 |        |       |        |       |
| 0.00   | 42.32 | 0.00   | 42.10 |        |       |        |       |

Table S6. Experimental data for Figure 5.
